# Supplementary material for: Large-scale insect outbreak homogenizes the spatial structure of ectomycorrhizal fungal communities
Source: PeerJ. 2019 May 10;7:e6895. doi: 10.7717/peerj.6895 (PMC6512761; doi:10.7717/peerj.6895)
Supplement: Dataset S1 — Three data sets are shown, (i) raw OTU data table, (ii) final OTU data matrix, (iii) site-level properties matrix. [file peerj-07-6895-s004.xlsx]

## Sheet: raw_otu_table
OUT ID	c1	c2	c3	c4	c5	c6	c7	c8	c9	c10	c11	c12	c13	c14	c15	c16	c17	c18	c19	c20	c21	c22	c23	c24	c25	c26	c27	c28	c29	c30	c31	c32	c33	c34	c35	c36	c37	c38	c39	c40	c41	c42	c43	c44	c45	c46	c47	c48	c49
O_06	3	1	9	6	1	19	51	137	10	0	1	0	4	0	3	8	4	12	36	149	1	0	45	7	32	70	5	32	11	1	2	30	1	0	35	116	0	1	1	7	1	0	0	3	2	0	0	1	0
O_10	2	2	10	5	0	2	36	142	1	0	1	2	0	0	2	2	10	3	0	56	0	0	45	0	17	11	12	3	19	6	3	15	1	1	2	39	1	0	1	2	0	0	0	2	4	0	1	0	0
O_103	1	0	0	1	0	0	1	1	1	0	0	0	0	0	0	0	0	0	0	13	0	0	6	0	0	8	0	0	1	0	0	1	0	1	0	2	0	0	0	4	0	0	0	0	0	0	0	0	0
O_113	3	1	12	6	2	1	171	211	3	0	1	2	1	13	2	3	15	7	2	570	1	0	23	2	50	30	9	1	5	3	4	20	1	10	2	117	16	3	1	399	2	1	2	0	2	0	0	1	0
O_13	0	2	2	160	0	1	238	285	1	0	3	1	0	1	4	1	0	6	23	7	1	0	6	0	6	39	0	53	9	0	2	8	19	1	2	48	1	1	0	3	0	0	1	2	0	0	0	0	0
O_133	0	0	0	0	0	0	1	1	0	0	0	0	0	0	1	0	0	0	0	0	0	0	0	0	0	0	0	0	0	0	0	0	0	0	0	4	0	0	0	0	0	0	2	0	0	0	0	0	0
O_134	0	1	3	21	0	3	35	37	0	0	4	0	1	0	0	1	1	0	1	7	0	0	6	2	9	3	7	0	1	0	1	8	0	0	3	24	0	0	1	0	1	1	0	1	3	0	0	0	0
O_160	0	0	0	0	0	0	1	2	0	0	0	0	0	0	0	0	0	0	0	0	0	0	0	0	0	0	2	0	0	0	0	0	0	0	0	4	0	0	0	0	0	0	0	0	0	0	0	0	0
O_169	230	1577	281	3345	673	1410	4415	14869	475	1	975	302	426	205	1123	1183	937	1588	1783	45355	407	0	41037	2413	1313	41628	1369	2555	12535	741	3710	1389	3408	149	29133	5976	204	227	625	358	147	201	155	526	268	0	257	164	2
O_182	0	1	0	1	0	1	0	10	0	0	0	0	1	0	0	1	0	0	0	17	0	0	18	0	9	7	0	0	0	0	2	0	0	0	0	45	0	0	2	0	0	0	0	0	0	0	0	0	0
O_183	1	1	13	4	0	1	32	55	1	0	0	0	0	1	1	0	9	1	1	14	1	0	6	0	19	11	11	1	0	2	0	1	0	2	1	30	1	0	1	0	0	0	0	0	0	0	0	0	0
O_184	0	0	0	0	0	0	3	0	0	0	2	0	0	0	0	0	0	0	0	0	2	0	0	0	1	23	2	0	0	0	1	0	0	0	1	4	0	0	0	0	0	0	0	0	0	0	0	0	0
O_189	0	0	2	22	1	2	22	33	1	0	1	0	2	0	12	4	1	26	23	37	1	0	129	1	26	31	1	11	6	1	15	4	0	3	7	148	0	0	2	3	2	0	1	1	4	0	0	0	0
O_192	1	0	4	9	0	0	9	8	20	0	74	1	2	0	1	1	6	2	4	5	23	0	6	3	4	12	6	1	1	1	0	5	0	2	3	14	0	0	1	2	0	0	0	0	0	0	1	1	0
O_203	0	0	1	1	0	1	0	6	0	0	0	0	0	0	0	0	0	0	0	9	1	0	2	0	2	10	1	0	0	0	1	0	0	0	3	8	0	0	0	0	0	0	0	0	0	0	0	0	0
O_217	1	0	2	52	0	2	36	30	1	0	0	0	1	0	1	1	1	0	0	10	0	0	7	0	5	82	1	1	0	0	1	18	0	2	0	6	1	0	0	6	0	0	0	0	0	0	0	0	0
O_231	0	2	4	7	1	2	12	36	0	0	0	1	0	1	0	0	3	1	0	7	0	0	28	0	4	11	10	6	4	0	0	3	0	0	6	24	1	0	3	3	0	0	0	0	0	0	0	0	0
O_235	4	3	25	36	3	8	132	435	7	0	5	3	6	4	9	5	8	7	3	205	4	0	137	1	54	254	549	5	13	6	9	31	1	5	16	265	0	0	130	28	3	1	2	6	1	0	5	3	0
O_24	0	0	0	0	0	0	2	0	0	0	0	0	1	0	0	0	0	0	0	0	0	0	0	0	0	0	0	0	0	0	0	0	0	0	0	0	0	0	0	0	0	0	0	0	0	0	0	0	0
O_243	4	0	2	3	0	4	11	18	6	0	5	1	1	1	1	0	2	16	31	2	1	0	50	1	259	0	0	2	0	5	4	7	1	0	1	876	0	2	2	3	1	0	0	1	3	0	1	0	0
O_254	1	0	0	0	0	0	2	18	0	0	0	0	0	0	0	0	0	0	0	18	0	0	3	0	0	17	0	0	0	0	0	1	1	0	0	2	1	0	1	6	0	0	0	0	0	0	0	0	0
O_263	1	1	2	10	1	2	3	18	0	0	1	0	0	2	1	2	2	0	1	942	0	0	1	0	2	4	0	2	1	0	0	1	2	0	0	5	0	0	0	3	0	0	0	1	0	0	1	1	0
O_284	4	2	6	25	0	3	23	45	0	0	0	0	1	0	0	1	4	0	0	18	0	0	8	0	17	8	2	0	1	2	1	3	1	0	2	52	2	0	1	7	0	0	1	0	0	0	0	0	0
O_286	18	33	69	37	2	57	322	564	8	0	15	11	10	9	7	21	40	44	54	154	7	0	366	15	95	532	4669	17	49	26	40	23	17	21	86	220	14	5	1117	16	13	7	5	9	7	0	6	5	0
O_287	1	2	0	0	0	0	2	5	0	0	1	1	0	0	1	0	0	0	1	5	1	0	5	2	0	1	7	0	5	0	1	4	1	0	5	2	0	0	3	0	0	0	0	1	0	0	0	0	0
O_29	0	0	1	1	0	1	2	38	0	0	0	0	0	0	2	0	0	3	0	6	0	0	5	0	2	3	0	0	0	0	1	0	0	2	1	11	0	0	0	1	0	0	0	0	0	0	0	0	0
O_291	2	2	4	31	0	2	8	22	44	0	2	0	2	0	2	0	1	254	25	24	0	0	26	2	13	20	2	12	1	2	1	3	0	1	0	38	1	0	0	12	0	0	0	2	0	0	1	7	0
O_294	3	0	6	9	0	3	21	2581	3	0	0	2	2	2	3	2	4	35	6	6	0	0	6	1	95	2	4	2	2	2	4	9	1	2	1	444	3	3	0	3	2	0	4	3	2	0	13	0	0
O_295	0	1	0	0	0	0	0	1	0	0	1	0	0	0	0	0	0	6	0	5	1	0	1	0	0	32	0	1	0	0	0	1	0	0	0	0	0	0	0	0	0	0	0	0	0	0	0	0	0
O_296	0	4	5	3	13	0	3	29	0	0	0	0	0	0	1	1	28	0	13	13	0	0	56	1	1	2	1	2	0	6	5	2	0	1	0	6	0	1	0	9	0	1	1	0	0	0	0	0	0
O_297	0	0	0	1	0	0	23	0	0	0	1	0	0	0	0	1	0	2	0	3	2	0	1	0	5	4	3	7	0	0	0	0	0	0	2	9	0	0	2	0	0	0	0	0	0	0	0	0	0
O_298	0	0	0	2	0	1	16	0	1	0	0	0	93	0	1	0	0	3	3	0	0	0	25	1	2	0	0	1	0	0	1	3	0	0	1	10	0	1	0	3	0	0	0	0	0	0	0	0	0
O_299	32	181	58	201	14	65	341	594	20	0	39	23	31	18	52	524	65	39	23	1007	16	0	147	14	182	185	13009	52	121	31	26	93	18	26	40	530	27	27	2454	80	18	43	16	15	16	0	18	20	0
O_30	0	0	3	13	0	0	17	45	0	0	0	0	0	0	0	2	3	2	9	9	0	0	7	0	7	16	1	1	0	0	1	3	0	2	1	13	0	0	0	0	0	1	0	0	0	0	0	0	0
O_319	0	1	0	8	0	3	66	96	2	0	0	0	0	1	0	6	0	7	3	188	1	0	48	3	7	23	11	2	6	4	7	3	2	0	24	48	1	0	0	21	0	0	1	0	2	0	0	0	0
O_322	4	4	41	69	6	8	289	569	10	0	30	8	6	8	18	28	46	138	134	761	6	0	238	22	168	321	256	20	16	27	32	37	11	11	38	1009	12	2	86	66	5	3	4	9	5	0	8	5	0
O_329	0	0	0	0	0	1	1	0	0	0	0	0	1	1	0	0	0	2	0	6	0	0	1	0	0	0	0	0	1	0	0	2	0	0	0	1	0	0	0	1	0	0	0	0	0	0	0	0	0
O_339	0	0	0	1	0	0	1	0	0	0	0	0	0	0	1	0	0	0	0	3	1	0	14	0	0	0	0	0	5	0	0	4	0	0	0	3	0	0	0	0	0	0	0	1	1	0	0	0	0
O_340	0	0	0	1	0	3	0	0	0	0	0	0	0	0	0	0	0	0	0	17	0	0	0	0	0	4	22	0	0	0	0	0	0	0	0	0	0	0	3	0	0	0	0	0	0	0	0	0	0
O_341	0	1	2	3	0	2	11	113	0	0	1	0	0	0	0	0	1	0	0	31	1	0	27	0	0	35	3	1	5	1	1	0	3	0	17	7	0	0	0	3	0	0	0	2	1	0	0	0	0
O_342	1	2	0	13	1	144	1	5	0	0	1	1	0	0	1	1	0	4	1	10	0	0	3	0	0	2	0	1	0	0	2	0	0	0	7	2	0	0	0	1	1	1	0	0	0	0	0	1	0
O_347	0	0	0	0	0	1	0	3	0	0	0	0	0	0	0	0	0	0	0	0	0	0	1	0	0	1	0	2	2	0	0	0	0	0	0	1	0	0	0	0	0	0	0	0	1	0	0	0	0
O_349	0	0	0	0	0	0	5	0	0	0	0	0	0	0	0	0	0	0	0	13	0	0	1	0	0	4	0	1	0	0	0	0	0	0	1	0	1	0	0	1	0	0	0	0	0	0	0	0	0
O_372	0	0	0	0	0	1	2	0	0	0	0	0	0	0	0	0	0	8	0	0	0	0	0	0	0	1	0	0	0	0	0	0	0	0	0	0	0	0	0	0	0	0	0	0	0	0	0	0	0
O_374	9	3	47	40	1	13	117	244	2	0	4	2	3	2	3	6	24	12	16	119	1	0	194	6	70	97	136	11	44	17	17	22	6	6	43	210	2	1	28	16	1	1	5	2	4	0	2	1	0
O_376	0	4	4	0	0	19	5	9	2	0	3	1	0	0	0	1	1	0	2	6	0	0	22	0	9	1	18	2	10	0	1	27	0	0	5	15	1	0	3	8	0	0	0	1	7	0	0	0	0
O_379	0	0	0	0	0	1	1	3	0	0	0	0	0	0	0	0	0	0	0	24	0	0	9	0	1	0	12	0	0	0	1	0	0	0	1	13	0	1	1	1	0	0	0	0	0	0	0	0	0
O_438	0	0	1	7	0	0	0	3	0	0	0	0	0	0	0	1	0	1	0	8	0	0	15	1	0	2	0	0	5	1	0	2	0	0	2	1	0	1	0	2	0	0	0	0	0	0	0	0	0
O_439	22	17	205	90	55	76	260	1335	24	0	19	27	17	15	18	24	40	93	304	1447	8	0	771	17	686	386	359	57	72	23	78	201	36	53	342	2393	10	8	92	78	7	6	7	13	27	0	12	4	0
O_442	37	39	221	564	40	216	4850	10852	130	0	166	35	115	88	79	71	103	830	1852	6143	47	0	1783	29	605	5366	515	488	89	83	183	217	51	75	224	4448	82	39	136	1323	39	19	26	101	41	1	52	40	1
O_45	0	2	0	59	0	0	1	0	1	0	0	0	0	3	3	0	1	0	0	7	0	0	2	0	0	11	2	10	0	0	0	38	1	0	0	0	0	1	0	4	0	0	0	0	1	0	0	0	0
O_454	8	0	20	8	1	3	81	185	1	0	5	1	1	2	4	3	25	2	4	14	0	0	24	1	58	21	23	4	2	2	0	7	0	9	0	70	1	1	3	7	1	1	1	1	2	0	1	0	0
O_455	0	0	0	0	2	0	0	6	0	0	1	0	0	0	0	0	0	2	0	42	0	0	39	0	0	13	2	0	0	1	1	0	0	0	1	3	0	0	2	0	0	0	0	0	0	0	0	0	0
O_459	1	0	7	3	0	1	16	33	2	0	0	1	1	0	0	0	0	2	1	335	0	0	43	0	1	85	1	2	0	0	1	1	0	0	23	6	0	0	0	7	1	0	0	0	1	0	1	1	0
O_46	1	0	2	0	0	0	6	12	0	0	0	1	0	0	0	0	0	0	0	1	0	0	3	0	5	1	4	0	0	0	0	0	0	0	0	6	1	0	1	0	0	0	0	0	0	0	0	0	0
O_466	0	0	0	0	0	0	0	3	0	0	0	0	0	0	0	0	0	1	0	3	0	0	1	0	0	0	0	0	0	0	1	2	0	0	0	5	0	0	0	0	0	0	0	0	0	0	0	0	0
O_468	0	0	1	1	0	2	2	0	0	0	0	0	0	1	0	0	0	0	0	0	0	0	11	0	0	0	0	1	0	0	0	0	0	2	0	1	0	1	0	0	0	0	0	0	0	0	0	0	0
O_484	0	0	0	2	0	0	1	0	0	0	1	0	0	1	0	0	5	0	1	4	0	0	9	0	1	0	0	0	9	2	2	4	0	0	1	14	0	0	0	4	0	0	0	0	0	0	0	0	0
O_492	1	5	17	23	7	13	99	110	22	0	4	4	12	2	4	7	7	44	71	127	3	0	218	8	26	100	534	22	27	11	20	12	10	5	100	96	5	3	176	7	2	2	3	2	1	0	3	4	0
O_495	0	0	2	0	0	0	94	0	0	0	1	0	0	1	1	0	0	0	0	0	0	0	1	0	0	0	1	0	0	0	0	0	0	0	0	18	0	0	0	1	0	0	0	0	0	0	0	0	0
O_503	0	0	1	0	0	20	2	17	0	0	0	0	0	0	0	0	0	2	0	0	0	0	2	0	4	2	0	0	0	0	0	1	0	0	0	18	0	0	0	0	0	0	0	0	0	0	0	0	0
O_509	0	0	2	6	0	4	43	15	0	0	1	2	0	0	0	1	0	23	3	28	1	0	13	0	4	33	15	3	2	0	1	1	0	0	0	58	0	0	6	3	1	0	0	0	0	0	0	2	0
O_511	0	0	1	1	0	0	1	4	0	0	0	1	0	0	0	0	0	1	0	0	0	0	1	0	1	1	0	0	2	0	0	1	0	0	0	0	1	0	0	0	0	0	0	0	0	0	0	0	0
O_516	15	3	61	199	12	10	707	265	12	0	10	6	8	4	15	17	26	41	162	411	7	0	167	3	178	148	79	7	3	5	18	59	5	10	8	887	5	3	15	30	5	6	1	2	5	0	6	2	0
O_520	1	0	1	1	0	2	2	3	2	0	0	1	3	2	1	4	1	54	1549	0	0	0	0	0	0	0	11	1	1	0	45	3	2	0	0	4	2	0	5	2	4	1	0	1	2	0	0	5	0
O_521	17	5	33	26	4	23	419	115	25	0	25	12	25	109	17	15	18	41	43	735	10	0	9030	13	49	52	35	4	18	12	619	38	4	1	886	243	84	11	18	715	8	4	10	7	12	0	8	4	1
O_522	0	0	1	0	0	0	0	1	0	0	0	0	0	0	0	0	1	0	0	0	0	0	3	0	1	2	0	1	0	0	1	0	0	0	0	1	0	1	0	1	0	0	0	0	0	0	0	0	0
O_523	7	9	19	465	3	11	205	267	4	0	3	4	8	1	92	13	23	8	140	356	3	0	82	2	40	158	34	21	35	4	8	122	5	13	27	154	5	3	17	8	0	2	2	4	5	0	5	3	1
O_525	0	2	0	4	0	0	2	18	1	0	0	1	0	0	0	0	0	1	1	76	0	0	3	0	0	2	1	5	0	0	1	0	0	0	0	5	0	0	1	5	0	1	1	0	0	0	0	0	0
O_526	0	1	0	0	0	1	1	5	0	0	0	0	0	0	0	0	1	1	0	14	0	0	16	3	2	14	2	2	2	0	1	0	2	0	9	7	0	1	2	0	0	0	0	0	0	0	0	0	0
O_527	3	3	2	5	4	2	16	2	20	0	4	4	2	25	4	1	1	118	18	0	1	0	2753	0	2	8	2	2	2	0	216	7	3	2	633	14	18	1	2	372	0	0	1	2	2	0	2	2	0
O_529	62	13	194	103	1	39	697	2361	22	0	1199	22	16	14	14	27	167	111	145	140	305	0	164	6	432	399	220	23	36	68	40	71	38	59	11	790	14	7	39	93	9	8	13	28	15	0	7	11	0
O_530	0	1	1	0	0	3	0	0	0	0	0	0	0	0	0	0	1	0	0	0	0	0	1	0	1	0	0	0	0	0	0	2	0	0	0	5	0	0	0	0	0	0	0	0	0	0	0	0	0
O_531	1	0	0	1	0	1	1	3	3	0	0	0	0	0	0	0	0	2	0	0	0	0	0	0	1	5	1	0	0	0	0	0	0	0	0	1	0	0	0	0	0	0	0	0	0	0	0	0	0
O_532	0	0	0	0	0	0	3	9	0	0	0	0	0	0	0	0	0	0	0	2	0	0	2	0	4	12	0	0	0	0	0	1	0	0	0	11	0	0	0	0	0	1	0	0	0	0	0	0	0
O_534	0	1	1	0	0	1	81	65	3	0	2	0	1	2	1	1	0	13	0	179	1	0	17	0	23	8	0	6	0	1	1	1	2	0	0	53	0	2	1	1	1	0	0	0	0	0	0	0	0
O_535	1	0	7	499	1	2	12	45	0	0	11	0	1	1	0	3	2	5	4	8	22	0	30	0	8	106	8	3	1	0	3	3	5	0	16	45	2	0	2	1	0	1	0	2	1	0	0	0	0
O_536	62	15	225	172	10	103	913	2669	21	0	36	32	20	6	28	52	208	533	70	368	12	0	338	11	576	371	349	32	41	75	36	170	23	83	25	1166	16	5	64	71	13	10	8	12	33	0	13	16	1
O_537	1	0	3	1	0	0	4	7	0	0	0	0	0	0	0	0	0	0	0	0	0	0	8	0	4	1	0	1	0	1	0	0	0	1	0	10	0	1	0	1	0	0	0	0	0	0	0	0	0
O_539	0	0	0	3	0	0	1	0	0	0	2	0	0	0	0	0	0	1	1	2	0	0	0	0	1	2	0	0	1	0	0	0	0	0	1	2	0	0	0	0	0	1	0	0	0	0	0	0	0
O_540	0	0	1	0	0	12	0	0	0	0	0	0	0	0	0	0	1	0	0	4	0	0	4	0	2	0	0	0	0	0	0	0	0	0	0	1	0	0	2	0	0	0	0	0	0	0	0	0	0
O_541	0	0	1	8	0	12	5	75	1	0	1	4	0	1	2	2	1	10	1	217	0	0	15	0	2	2	0	6	0	0	0	66	1	0	0	18	0	1	2	0	0	0	0	0	6	0	1	0	0
O_543	0	0	0	0	0	0	1	3	0	0	0	0	0	1	0	0	0	0	0	2	0	0	2	0	2	0	0	1	0	0	2	0	0	1	2	1	0	0	0	0	0	0	0	0	1	0	0	0	0
O_545	0	0	0	1	0	1	18	25	0	0	0	0	0	1	0	0	4	1	4	48	0	0	4	0	2	14	1	0	0	1	2	2	0	0	0	6	0	0	0	0	1	0	0	0	1	0	0	0	0
O_548	0	0	4	24	0	3	18	64	1	0	0	1	0	2	2	1	5	1	0	8	0	0	98	1	16	10	4	0	0	0	6	2	2	1	0	57	2	0	0	22	0	1	0	0	1	0	1	0	0
O_549	0	0	0	0	0	0	0	0	0	0	0	0	0	0	0	0	0	6	0	1	0	0	0	0	0	0	0	1	0	0	0	0	0	0	0	0	0	0	0	0	0	0	0	0	0	0	0	0	0
O_552	7	2	19	10	0	2	211	170	0	0	4	2	0	0	1	5	17	5	3	536	1	0	11	1	45	26	16	16	9	4	2	16	1	3	2	92	0	0	7	4	0	1	0	2	6	0	0	0	0
O_554	2	3	8	14	1	4	34	115	8	0	2	1	2	1	1	4	8	25	5	277	0	0	176	4	19	108	1	5	25	1	26	3	12	3	67	124	1	0	1	6	1	0	1	1	0	0	4	1	0
O_555	0	0	5	2	6	0	2	15	0	0	0	0	0	0	0	0	0	0	0	1	0	0	4	0	3	6	2	1	0	1	0	1	0	2	0	12	0	0	0	0	0	0	0	1	0	0	0	0	0
O_59	9	36	17	66	9	13	94	609	3	0	5	9	4	103	14	8	5	4	6	21	8	0	8	3	1	9	9	42	21	9	9	49	5	3	5	75	122	2	4	2446	8	7	4	4	7	0	6	3	0
O_637	0	1	0	1	1	0	2	6	1	0	6	0	0	0	0	0	3	2	0	0	11	0	1	0	43	266	8	0	2	0	1	2	0	1	11	66	0	0	3	2	0	0	0	2	2	0	0	0	0
O_642	0	0	2	13	0	0	8	26	1	0	0	1	0	0	0	0	2	1	0	4	1	0	4	0	7	0	1	0	0	0	1	5	0	1	0	11	0	0	4	1	0	0	0	0	0	0	0	1	0
O_653	0	0	0	1	0	0	0	9	0	0	2	0	0	0	0	0	0	0	1	8	0	0	2	0	1	0	0	0	0	0	0	1	0	0	0	5	0	0	1	0	0	0	0	0	0	0	0	0	0
O_655	0	0	1	1	0	0	2	0	0	0	0	1	0	0	0	0	0	0	0	3	0	0	1	0	0	34	0	0	0	0	0	0	0	0	0	0	0	0	0	0	0	0	0	0	0	0	0	0	0
O_656	0	0	0	2	0	1	0	0	0	0	0	0	0	0	0	0	0	2	0	27	0	0	0	0	0	1	0	0	0	0	0	0	0	0	0	0	0	0	0	0	0	0	0	0	0	0	0	0	0
O_658	0	1	0	3	0	1	1	8	0	0	0	0	0	0	0	0	0	0	0	3	0	0	0	0	0	0	0	0	0	0	0	0	0	0	0	4	0	0	0	0	0	0	0	0	0	0	0	0	0
O_66	2	0	1	7	1	9	5	2	4	0	41	2	1	4	1	2	0	3	4	4	56	0	5	0	0	369	0	2	10	1	2	3	0	0	55	2	3	2	1	1	0	2	1	2	0	0	1	0	0
O_674	0	0	1	6	17	0	1	1	0	0	0	0	0	0	0	0	0	1	1	41	0	0	18	1	2	0	0	1	0	0	0	1	0	0	0	17	0	0	0	0	0	0	0	0	0	0	0	0	0
O_69	1	4	1	5	2	7	3	263	0	0	5	5	4	5	3	3	1	4	0	3464	2	0	4	3	2	3	4	2	1	5	5	4	3	0	0	6	8	5	2	16	3	1	2	1	0	0	3	3	0
O_731	6	9	33	369	6	15	160	219	6	0	6	1	4	6	17	3	19	23	4	713	1	0	247	6	74	33	79	156	8	4	20	11	6	3	2	331	4	1	27	46	3	2	3	2	3	0	3	4	0
O_736	1	2	3	0	0	0	11	11	0	0	3	0	2	0	0	2	10	2	1	2	1	0	84	0	4	12	2	1	5	8	9	5	0	2	4	20	0	0	0	4	0	0	1	3	1	0	0	0	0
O_738	0	1	2	0	0	0	1	0	0	0	0	0	0	0	0	0	0	5	0	0	0	0	0	0	0	4	0	0	0	0	0	0	0	0	1	2	0	1	0	0	0	0	0	0	0	0	0	0	0
O_739	0	0	0	0	0	0	0	1	0	0	0	0	0	0	1	0	0	2	0	2	0	0	2	0	2	2	0	0	0	0	0	0	0	0	0	9	0	0	0	0	0	0	0	0	0	0	0	1	0
O_74	1	1	8	6	0	2	37	49	3	0	0	8	1	0	1	0	1	0	0	43	0	0	29	0	16	5	2	0	3	1	3	164	1	2	2	58	1	0	0	11	0	0	0	0	7	0	0	1	0
O_740	3	0	8	114	1	3	12	59	3	0	2	1	6	3	6	1	2	4	2	58	2	0	75	1	2	878	4	8	1	0	2	29	7	5	1	15	4	2	5	88	0	1	1	2	1	1	1	0	0
O_741	1	0	1	0	0	0	1	1	0	0	0	0	0	0	0	0	0	0	0	0	0	0	1	0	0	0	0	0	0	0	0	0	0	0	0	1	0	0	0	1	0	0	0	0	0	0	0	0	0
O_792	0	0	12	1	0	0	2	2	0	0	0	0	0	0	0	0	0	0	0	0	0	0	1	0	0	2	0	0	1	0	0	1	0	7	0	2	0	0	0	0	0	0	0	0	0	0	0	0	0
O_794	0	0	1	1	1	0	2	19	0	0	1	0	0	0	1	2	0	8	153	0	0	0	0	0	0	0	0	0	1	0	5	1	1	0	1	5	3	0	0	1	1	0	0	0	0	0	1	0	0
O_82	0	0	0	1	0	1	0	6	0	0	0	0	0	0	0	0	0	5	1	1	1	0	0	0	1	3	1	0	3	0	0	1	0	1	2	1	0	0	1	0	0	0	0	0	0	0	0	0	0
O_823	3	2	2	21	0	3	34	121	0	0	3	2	4	3	5	1	9	0	14	179	0	0	45	1	22	43	16	0	3	3	1	5	2	3	0	99	4	1	3	12	2	0	0	0	0	0	1	0	0
O_837	0	0	0	1	0	0	3	0	2	0	0	0	0	0	0	0	0	1	0	13	0	0	1	0	0	4	0	0	0	0	0	0	0	0	0	1	0	1	0	0	0	0	0	0	0	0	0	0	0
O_84	0	3	2	13	11	2	2	3	28	0	1	2	1	0	0	1	2	330	1	1	0	0	2	0	7	78	1	3	12	1	1	6	1	2	1	15	0	2	0	4	2	0	1	0	1	0	0	1	0
O_841	0	0	0	0	0	0	0	5	0	0	1	0	0	0	0	0	0	1	0	5	0	0	1	0	0	0	0	0	0	0	0	0	0	0	0	0	0	0	0	0	0	0	0	0	0	0	0	0	0
O_850	0	0	0	0	0	0	1	3	0	0	4	0	0	0	0	0	1	0	22	1	3	0	4	0	1	8	8	3	0	0	0	0	0	0	0	12	0	0	0	1	0	1	0	0	0	0	0	0	0
O_851	3	1	15	2	0	1	17	70	0	0	0	1	1	0	2	2	4	5	1	12	1	0	25	0	17	7	7	1	0	0	6	1	1	3	0	63	0	0	3	0	1	1	0	0	0	0	0	0	0
O_852	0	0	0	0	0	0	35	14	0	0	1	0	0	1	0	0	0	1	0	11	0	0	3	0	2	2	0	0	0	0	1	0	0	0	0	5	0	0	0	2	0	0	0	0	1	0	0	0	0
O_863	0	0	0	0	0	1	1	3	0	0	0	0	0	0	0	1	1	216	0	3	1	0	3	0	0	13	1	0	0	0	0	2	0	0	1	1	0	0	0	0	1	0	0	0	0	0	0	2	0
O_864	0	1	0	1	16	3	42	8	0	0	0	0	0	1	0	0	1	0	0	11	0	0	7	0	0	0	4	0	4	1	1	0	0	0	3	3	0	0	0	11	0	0	0	0	0	0	0	0	0
O_865	1	1	0	2	0	2	8	7	4	0	0	0	0	0	0	2	1	13	6	13	0	0	4	0	5	23	4	2	0	0	1	0	1	0	2	67	0	0	2	1	2	0	1	1	1	0	0	0	0
O_97	0	1	0	0	0	2	1	2	0	0	0	0	0	0	1	0	0	0	0	2	0	0	0	0	0	2	0	0	1	0	0	5	0	0	0	8	0	0	0	1	0	0	1	0	0	0	0	0	0
O_98	1	6	0	14	10	5	12	48	16	0	5	2	3	6	7	2	2	14	3	65	1	0	89	3	8	89	587	4	16	1	10	2	5	1	28	41	12	1	122	152	1	2	2	0	1	0	0	0	0
[truncated: 841 more columns]

## Sheet: final matrix
sample	plot	subplot	core	geox	geoy	Amphinema	Russula	Cortinarius	Russula	Piloderma	Cortinarius	Cortinarius	Russulaceae	Cortinarius	Cortinarius	Cortinarius	Suillus	Russula	Russula	Cortinarius	Hymenogaster	Cortinarius	Cortinarius	Pseudotomentella	Tomentella	Cortinarius	Russula	Cortinarius	Russula	Cortinarius	Tomentella	Hygrophorus	Russulaceae	Russulaceae	Russula	Russula	Russula	Russula	Cortinarius	Russula	Amphinema	Tylospora	Inocybaceae	Russula	Russula	Gymnomyces	Rhizopogon	Pseudotomentella	Piloderma
c1	7	1	a	0	0	3	2	1	3	0	0	0	0	230	0	1	0	0	1	0	1	0	4	0	4	1	1	4	18	1	0	2	3	0	0	0	0	32	0	0	4	0	0	0	0	1	0	0	0
c2	7	1	b	0.5	51	1	2	0	1	2	0	1	0	1577	1	1	0	0	0	0	0	2	3	0	0	0	1	2	33	2	0	2	0	1	4	0	0	181	0	1	4	0	0	0	1	2	0	0	0
c3	7	1	c	1.5	204	9	10	0	12	2	0	3	0	281	0	13	0	2	4	1	2	4	25	0	2	0	2	6	69	0	1	4	6	0	5	0	0	58	3	0	41	0	0	0	2	0	0	0	0
c4	7	1	d	1.2	-76	6	5	1	6	160	0	21	0	3345	1	4	0	22	9	1	52	7	36	0	3	0	10	25	37	0	1	31	9	0	3	1	2	201	13	8	69	0	1	1	3	13	0	0	0
c5	7	1	e	0	404	1	0	0	2	0	0	0	0	673	0	0	0	1	0	0	0	1	3	0	0	0	1	0	2	0	0	0	0	0	13	0	0	14	0	0	6	0	0	0	0	1	0	0	0
c6	7	1	f	1	500	19	2	0	1	1	0	3	0	1410	1	1	0	2	0	1	2	2	8	0	4	0	2	3	57	0	1	2	3	0	0	0	1	65	0	3	8	1	0	3	2	144	1	0	1
c7	7	1	g	2	-306	51	36	1	171	238	1	35	1	4415	0	32	3	22	9	0	36	12	132	2	11	2	3	23	322	2	2	8	21	0	3	23	16	341	17	66	289	1	1	0	11	1	0	5	2
c8	7	1	h	2.5	357	137	142	1	211	285	1	37	2	14869	10	55	0	33	8	6	30	36	435	0	18	18	18	45	564	5	38	22	2581	1	29	0	0	594	45	96	569	0	0	0	113	5	3	0	0
c9	7	2	a	4	0	10	1	1	3	1	0	0	0	475	0	1	0	1	20	0	1	0	7	0	6	0	0	0	8	0	0	44	3	0	0	0	1	20	0	2	10	0	0	0	0	0	0	0	0
c10	7	2	b	4.5	51	0	0	0	0	0	0	0	0	1	0	0	0	0	0	0	0	0	0	0	0	0	0	0	0	0	0	0	0	0	0	0	0	0	0	0	0	0	0	0	0	0	0	0	0
c11	7	2	c	5.5	204	1	1	0	1	3	0	4	0	975	0	0	2	1	74	0	0	0	5	0	5	0	1	0	15	1	0	2	0	1	0	1	0	39	0	0	30	0	0	0	1	1	0	0	0
c12	7	2	d	5.2	-76	0	2	0	2	1	0	0	0	302	0	0	0	0	1	0	0	1	3	0	1	0	0	0	11	1	0	0	2	0	0	0	0	23	0	0	8	0	0	0	0	1	0	0	0
c13	7	2	e	4	404	4	0	0	1	0	0	1	0	426	1	0	0	2	2	0	1	0	6	1	1	0	0	1	10	0	0	2	2	0	0	0	93	31	0	0	6	1	0	0	0	0	0	0	0
c14	7	2	f	5	500	0	0	0	13	1	0	0	0	205	0	1	0	0	0	0	0	1	4	0	1	0	2	0	9	0	0	0	2	0	0	0	0	18	0	1	8	1	0	0	0	0	0	0	0
c15	7	2	g	6	-306	3	2	0	2	4	1	0	0	1123	0	1	0	12	1	0	1	0	9	0	1	0	1	0	7	1	2	2	3	0	1	0	1	52	0	0	18	0	1	0	0	1	0	0	0
c16	7	2	h	6.5	357	8	2	0	3	1	0	1	0	1183	1	0	0	4	1	0	1	0	5	0	0	0	2	1	21	0	0	0	2	0	1	1	0	524	2	6	28	0	0	0	0	1	0	0	0
c17	7	3	a	8	0	4	10	0	15	0	0	1	0	937	0	9	0	1	6	0	1	3	8	0	2	0	2	4	40	0	0	1	4	0	28	0	0	65	3	0	46	0	0	0	1	0	0	0	0
c18	7	3	b	8.5	51	12	3	0	7	6	0	0	0	1588	0	1	0	26	2	0	0	1	7	0	16	0	0	0	44	0	3	254	35	6	0	2	3	39	2	7	138	2	0	0	0	4	0	0	8
c19	7	3	c	9.5	204	36	0	0	2	23	0	1	0	1783	0	1	0	23	4	0	0	0	3	0	31	0	1	0	54	1	0	25	6	0	13	0	3	23	9	3	134	0	0	0	0	1	0	0	0
c20	7	3	d	9.2	-76	149	56	13	570	7	0	7	0	45355	17	14	0	37	5	9	10	7	205	0	2	18	942	18	154	5	6	24	6	5	13	3	0	1007	9	188	761	6	3	17	31	10	0	13	0
c21	7	3	e	8	404	1	0	0	1	1	0	0	0	407	0	1	2	1	23	1	0	0	4	0	1	0	0	0	7	1	0	0	0	1	0	2	0	16	0	1	6	0	1	0	1	0	0	0	0
c22	7	3	f	9	500	0	0	0	0	0	0	0	0	0	0	0	0	0	0	0	0	0	0	0	0	0	0	0	0	0	0	0	0	0	0	0	0	0	0	0	0	0	0	0	0	0	0	0	0
c23	7	3	g	10	-306	45	45	6	23	6	0	6	0	41037	18	6	0	129	6	2	7	28	137	0	50	3	1	8	366	5	5	26	6	1	56	1	25	147	7	48	238	1	14	0	27	3	1	1	0
c24	7	3	h	10.5	357	7	0	0	2	0	0	2	0	2413	0	0	0	1	3	0	0	0	1	0	1	0	0	0	15	2	0	2	1	0	1	0	1	14	0	3	22	0	0	0	0	0	0	0	0
c25	7	4	a	12	0	32	17	0	50	6	0	9	0	1313	9	19	1	26	4	2	5	4	54	0	259	0	2	17	95	0	2	13	95	0	1	5	2	182	7	7	168	0	0	0	0	0	0	0	0
c26	7	4	b	12.5	51	70	11	8	30	39	0	3	0	41628	7	11	23	31	12	10	82	11	254	0	0	17	4	8	532	1	3	20	2	32	2	4	0	185	16	23	321	0	0	4	35	2	1	4	1
c27	7	4	c	13.5	204	5	12	0	9	0	0	7	2	1369	0	11	2	1	6	1	1	10	549	0	0	0	0	2	4669	7	0	2	4	0	1	3	0	13009	1	11	256	0	0	22	3	0	0	0	0
c28	7	4	d	13.2	-76	32	3	0	1	53	0	0	0	2555	0	1	0	11	1	0	1	6	5	0	2	0	2	0	17	0	0	12	2	1	2	7	1	52	1	2	20	0	0	0	1	1	2	1	0
c29	7	4	e	12	404	11	19	1	5	9	0	1	0	12535	0	0	0	6	1	0	0	4	13	0	0	0	1	1	49	5	0	1	2	0	0	0	0	121	0	6	16	1	5	0	5	0	2	0	0
c30	7	4	f	13	500	1	6	0	3	0	0	0	0	741	0	2	0	1	1	0	0	0	6	0	5	0	0	2	26	0	0	2	2	0	6	0	0	31	0	4	27	0	0	0	1	0	0	0	0
c31	7	4	g	14	-306	2	3	0	4	2	0	1	0	3710	2	0	1	15	0	1	1	0	9	0	4	0	0	1	40	1	1	1	4	0	5	0	1	26	1	7	32	0	0	0	1	2	0	0	0
c32	7	4	h	14.5	357	30	15	1	20	8	0	8	0	1389	0	1	0	4	5	0	18	3	31	0	7	1	1	3	23	4	0	3	9	1	2	0	3	93	3	3	37	2	4	0	0	0	0	0	0
c33	7	5	a	9	800	1	1	0	1	19	0	0	0	3408	0	0	0	0	0	0	0	0	1	0	1	1	2	1	17	1	0	0	1	0	0	0	0	18	0	2	11	0	0	0	3	0	0	0	0
c34	7	5	b	12.5	851	0	1	1	10	1	0	0	0	149	0	2	0	3	2	0	2	0	5	0	0	0	0	0	21	0	2	1	2	0	1	0	0	26	2	0	11	0	0	0	0	0	0	0	0
c35	7	5	c	13.5	1004	35	2	0	2	2	0	3	0	29133	0	1	1	7	3	3	0	6	16	0	1	0	0	2	86	5	1	0	1	0	0	2	1	40	1	24	38	0	0	0	17	7	0	1	0
c36	7	5	d	13.2	724	116	39	2	117	48	4	24	4	5976	45	30	4	148	14	8	6	24	265	0	876	2	5	52	220	2	11	38	444	0	6	9	10	530	13	48	1009	1	3	0	7	2	1	0	0
c37	7	5	e	12	1204	0	1	0	16	1	0	0	0	204	0	1	0	0	0	0	1	1	0	0	0	1	0	2	14	0	0	1	3	0	0	0	0	27	0	1	12	0	0	0	0	0	0	1	0
c38	7	5	f	13	1300	1	0	0	3	1	0	0	0	227	0	0	0	0	0	0	0	0	0	0	2	0	0	0	5	0	0	0	3	0	1	0	1	27	0	0	2	0	0	0	0	0	0	0	0
c39	7	5	g	14	494	1	1	0	1	0	0	1	0	625	2	1	0	2	1	0	0	3	130	0	2	1	0	1	1117	3	0	0	0	0	0	2	0	2454	0	0	86	0	0	3	0	0	0	0	0
c40	7	5	h	14.5	1157	7	2	4	399	3	0	0	0	358	0	0	0	3	2	0	6	3	28	0	3	6	3	7	16	0	1	12	3	0	9	0	3	80	0	21	66	1	0	0	3	1	0	1	0
c41	7	6	a	8	800	1	0	0	2	0	0	1	0	147	0	0	0	2	0	0	0	0	3	0	1	0	0	0	13	0	0	0	2	0	0	0	0	18	0	0	5	0	0	0	0	1	0	0	0
c42	7	6	b	8.5	851	0	0	0	1	0	0	1	0	201	0	0	0	0	0	0	0	0	1	0	0	0	0	0	7	0	0	0	0	0	1	0	0	43	1	0	3	0	0	0	0	1	0	0	0
c43	7	6	c	9.5	1004	0	0	0	2	1	2	0	0	155	0	0	0	1	0	0	0	0	2	0	0	0	0	1	5	0	0	0	4	0	1	0	0	16	0	1	4	0	0	0	0	0	0	0	0
c44	7	6	d	9.2	724	3	2	0	0	2	0	1	0	526	0	0	0	1	0	0	0	0	6	0	1	0	1	0	9	1	0	2	3	0	0	0	0	15	0	0	9	0	1	0	2	0	0	0	0
c45	7	6	e	8	1204	2	4	0	2	0	0	3	0	268	0	0	0	4	0	0	0	0	1	0	3	0	0	0	7	0	0	0	2	0	0	0	0	16	0	2	5	0	1	0	1	0	1	0	0
c46	7	6	f	9	1300	0	0	0	0	0	0	0	0	0	0	0	0	0	0	0	0	0	0	0	0	0	0	0	0	0	0	0	0	0	0	0	0	0	0	0	0	0	0	0	0	0	0	0	0
c47	7	6	g	10	494	0	1	0	0	0	0	0	0	257	0	0	0	0	1	0	0	0	5	0	1	0	1	0	6	0	0	1	13	0	0	0	0	18	0	0	8	0	0	0	0	0	0	0	0
c48	7	6	h	10.5	1157	1	0	0	1	0	0	0	0	164	0	0	0	0	1	0	0	0	3	0	0	0	1	0	5	0	0	7	0	0	0	0	0	20	0	0	5	0	0	0	0	1	0	0	0
c49	7	7	a	4	800	0	0	0	0	0	0	0	0	2	0	0	0	0	0	0	0	0	0	0	0	0	0	0	0	0	0	0	0	0	0	0	0	0	0	0	0	0	0	0	0	0	0	0	0
c50	7	7	b	4.5	851	0	0	0	0	0	0	0	0	1	0	0	0	0	0	0	0	0	0	0	0	0	0	0	0	0	0	0	0	0	0	0	0	0	0	0	0	0	0	0	0	0	0	0	0
c51	7	7	c	5.5	1004	0	0	0	0	0	0	0	0	2	0	0	0	0	0	0	0	0	0	0	0	0	0	0	0	0	0	0	0	0	0	0	0	0	0	0	0	0	0	0	0	0	0	0	0
c52	7	7	d	5.2	724	0	0	0	0	0	0	0	0	0	0	0	0	0	0	0	0	0	0	0	0	0	0	0	0	0	0	0	0	0	0	0	0	0	0	0	0	0	0	0	0	0	0	0	0
c53	7	7	e	4	1204	0	0	0	0	0	0	0	0	6	0	0	0	0	0	0	0	0	0	0	0	0	0	0	0	0	0	0	0	0	0	0	0	0	1	0	0	0	0	0	0	0	0	0	0
c54	7	7	f	5	1300	0	0	0	0	0	0	0	0	12	0	0	0	0	0	0	0	0	0	0	0	0	0	0	0	0	0	0	0	0	0	0	0	0	0	0	0	0	0	0	0	0	0	0	0
c55	7	7	g	6	494	0	0	0	0	0	0	0	0	2	0	0	0	0	0	0	0	0	0	0	0	0	0	0	0	0	0	0	0	0	0	0	0	0	0	0	0	0	0	0	0	0	0	0	0
c56	7	7	h	6.5	1157	0	0	0	0	0	0	0	0	0	0	0	0	0	0	0	0	0	0	0	0	0	0	0	0	0	0	0	0	0	0	0	0	0	0	0	0	0	0	0	0	0	0	0	0
c57	7	8	a	4	1600	0	0	0	0	0	0	0	0	0	0	0	0	0	0	0	0	0	0	0	0	0	0	0	0	0	0	0	0	0	0	0	0	0	0	0	0	0	0	0	0	0	0	0	0
c58	7	8	b	4.5	1651	0	0	0	0	0	0	0	0	0	0	0	0	0	0	0	0	0	0	0	0	0	0	0	0	0	0	0	0	0	0	0	0	0	0	0	0	0	0	0	0	0	0	0	0
c59	7	8	c	5.5	1804	0	0	0	0	0	0	0	0	2	0	0	0	0	0	0	0	0	0	0	0	0	0	0	0	0	0	0	0	0	0	0	0	0	0	0	0	0	0	0	0	0	0	0	0
c60	7	8	d	5.2	1524	0	0	0	0	0	0	0	0	1	0	0	0	0	0	0	0	0	0	0	0	0	0	0	0	0	0	0	0	0	0	0	0	0	0	0	0	0	0	0	0	0	0	0	0
c61	7	8	e	4	2004	0	0	0	0	0	0	0	0	0	0	0	0	0	0	0	0	0	0	0	0	0	0	0	0	0	0	1	0	0	0	0	0	0	0	0	0	0	0	0	0	0	0	0	0
c62	7	8	f	5	2100	0	0	0	0	0	0	0	0	4	0	0	0	0	0	0	0	0	0	0	0	0	0	0	0	0	0	0	0	0	0	0	0	0	0	0	0	0	0	0	0	0	0	0	0
c63	7	8	g	6	1294	0	0	0	0	0	0	0	0	5	0	0	0	0	0	0	0	0	0	0	0	0	0	0	0	0	0	0	0	0	0	0	0	0	1	0	0	0	0	0	0	0	0	0	0
c64	7	8	h	6.5	1957	1	0	0	0	0	0	0	0	3	0	0	0	0	0	0	0	0	0	0	0	0	0	0	0	0	0	0	0	0	0	0	0	1	0	0	0	0	0	0	0	0	0	0	0
c65	7	9	a	8	1600	0	0	0	0	0	0	0	0	2	0	0	0	0	0	0	0	0	0	0	0	0	0	0	0	0	0	0	0	0	0	0	0	0	0	0	0	0	0	0	0	0	0	0	0
c66	7	9	b	8.5	1651	0	0	0	0	0	0	0	0	0	0	0	0	0	0	0	0	0	0	0	0	0	0	0	0	0	0	0	0	0	0	0	0	0	0	0	0	0	0	0	0	0	0	0	0
c67	7	9	c	9.5	1804	0	0	0	0	0	0	0	0	2	0	0	0	0	0	0	0	0	0	0	0	0	0	0	0	0	0	0	0	0	0	0	0	0	0	0	0	0	0	0	0	0	0	0	0
c68	7	9	d	9.2	1524	0	0	0	0	0	0	0	0	0	0	0	0	0	0	0	0	0	0	0	0	0	0	0	0	0	0	0	0	0	0	0	0	0	0	0	0	0	0	0	0	0	0	0	0
c69	7	9	e	8	2004	0	0	0	0	0	0	0	0	5	0	0	0	0	0	0	0	0	0	0	0	0	0	0	0	0	0	0	0	0	0	0	0	0	0	0	0	0	0	0	0	0	0	0	0
c70	7	9	f	9	2100	0	0	0	0	0	0	0	0	1	0	0	0	0	0	0	0	0	0	0	0	0	0	0	0	0	0	0	0	0	0	0	0	1	0	0	0	0	0	0	0	0	0	0	0
c71	7	9	g	10	1294	0	0	0	0	0	0	0	0	0	0	0	0	0	0	0	0	0	0	0	0	0	0	0	0	0	0	0	0	0	0	0	0	0	0	0	0	0	0	0	0	0	0	0	0
c72	7	9	h	10.5	1957	0	0	0	0	0	0	0	0	1	0	0	0	0	0	0	0	0	0	0	0	0	0	0	0	0	0	0	0	0	0	0	0	0	0	0	0	0	0	0	0	0	0	0	0
c73	7	10	a	12	1600	0	0	0	0	0	0	0	0	3	0	0	0	0	0	0	0	0	0	0	0	0	0	0	0	0	0	0	0	0	0	0	0	0	0	0	1	0	0	0	0	0	0	0	0
c74	7	10	b	12.5	1651	26	320	5	91	3	1	7	1	11802	2	52	0	40	19	0	19	30	42	0	0	3	2	42	370	22	1	14	9	0	351	1	104	161	20	65	347	0	13	1	6	2	0	0	4
c75	7	10	c	13.5	1804	101	254	6	61	51	0	0	9	15121	3	0	0	164	9	5	7	14	193	1	135	2	5	1	409	1	19	715	263	31	2	8	48	226	19	65	1715	8	0	0	8	10	2	0	171
c76	7	10	d	13.2	1524	0	2	0	0	0	1	2	0	244	0	1	0	0	1	0	0	1	0	0	0	1	0	0	2	0	0	1	0	0	2	0	43	12	2	5	4	0	0	0	0	1	0	0	0
c77	7	10	e	12	2004	1	0	1	0	0	0	0	0	193	0	0	0	0	0	0	0	0	0	0	1	1	0	0	4	0	0	1	0	0	0	0	38	10	1	4	7	0	0	0	0	0	0	0	0
c78	7	10	f	13	2100	0	0	0	0	0	1	0	0	212	0	0	0	0	0	0	0	0	1	0	1	0	1	0	4	0	0	2	0	0	1	0	26	8	0	4	3	0	0	0	0	0	0	0	0
c79	7	10	g	14	1294	3	3	0	0	1	2	2	0	521	0	0	1	2	1	0	1	1	2	0	0	0	0	0	8	1	0	4	1	0	4	0	74	6	2	5	10	0	0	0	0	0	0	0	0
c80	7	10	h	14.5	1957	0	1	0	4	0	0	1	0	275	1	0	0	2	0	0	0	0	2	0	0	0	0	1	1	0	0	10	3	0	1	0	41	9	0	2	9	0	0	0	0	2	0	0	0
c81	1	1	a	0	0	0	0	0	0	0	0	1	0	9	0	0	0	0	0	0	0	0	0	0	0	0	0	0	1	0	0	1	0	0	0	0	29	4	0	0	0	0	0	0	1	0	0	0	0
c82	1	1	b	0.5	51	1	0	0	0	0	0	1	0	6	0	0	0	0	0	0	0	0	0	0	0	0	0	0	0	0	0	0	0	0	0	0	24	2	0	0	0	0	0	0	0	0	0	0	0
c83	1	1	c	1.5	204	1	0	0	0	0	0	0	0	37	0	0	0	0	0	0	1	0	0	0	0	0	0	0	1	0	0	2	0	0	1	0	86	9	0	1	0	0	0	0	0	0	0	0	0
c84	1	1	d	1.2	-76	0	0	0	0	1	0	0	0	29	0	1	0	0	0	0	0	0	0	0	0	0	0	1	0	0	1	0	0	0	2	0	32	6	0	1	0	0	0	0	1	0	0	0	0
c85	1	1	e	0	404	1	0	0	0	0	0	0	0	16	0	0	0	0	0	0	0	0	0	0	0	0	0	0	1	0	0	1	0	0	1	0	11	1	0	0	0	0	0	0	0	0	0	0	0
c86	1	1	f	1	500	0	0	0	0	0	0	0	0	5	0	0	0	0	0	0	0	0	0	0	0	0	0	0	0	0	0	0	0	0	0	0	0	0	0	0	0	0	0	0	0	0	0	0	0
c87	1	1	g	2	-306	0	0	0	0	0	0	0	0	1	0	0	0	0	0	0	0	0	0	0	0	0	0	0	0	0	0	0	0	0	0	0	0	0	0	0	0	0	0	0	0	0	0	0	0
c88	1	1	h	2.5	357	0	0	0	0	0	0	0	0	0	0	0	0	0	0	0	0	0	0	0	1	0	0	0	0	0	0	0	0	0	0	0	0	0	0	0	0	0	0	0	0	0	0	0	0
c89	1	2	a	4	0	0	0	0	0	0	0	0	0	0	0	0	0	0	0	0	0	0	0	0	0	0	0	0	0	0	0	0	0	0	0	0	0	0	0	0	0	0	0	0	0	0	0	0	0
c90	1	2	b	4.5	51	0	0	0	0	0	0	0	0	3	0	0	0	0	0	0	0	0	0	0	0	0	0	0	0	0	0	0	0	0	0	0	0	0	0	0	0	0	0	0	0	0	0	0	0
c91	1	2	c	5.5	204	0	0	0	0	0	0	0	0	4	0	0	0	0	0	0	0	0	0	0	0	0	0	0	0	0	0	0	0	0	0	0	13	0	0	0	0	0	0	0	0	0	0	0	0
c92	1	2	d	5.2	-76	0	0	0	0	0	0	0	0	1	0	0	0	0	0	0	0	0	0	0	0	0	0	0	0	0	0	0	0	0	0	0	0	0	0	0	0	0	0	0	0	0	0	0	0
c93	1	2	e	4	404	0	0	0	0	0	0	0	0	0	0	0	0	0	0	0	0	0	0	0	0	0	0	0	0	0	0	0	0	0	0	0	0	0	0	0	0	0	0	0	0	0	0	0	0
c94	1	2	f	5	500	0	0	0	0	0	0	0	0	0	0	0	0	0	0	0	0	0	0	0	0	0	0	0	0	0	0	0	0	0	0	0	0	0	0	0	0	0	0	0	0	0	0	0	0
c95	1	2	g	6	-306	0	0	0	0	0	0	0	0	1	0	0	0	0	0	0	0	0	0	0	0	0	0	0	0	0	0	0	0	0	0	0	0	0	0	0	0	0	0	0	0	0	0	0	0
c96	1	2	h	6.5	357	0	0	0	0	0	0	0	0	0	0	0	0	0	0	0	0	0	0	0	0	0	0	0	0	0	0	0	0	0	0	0	0	0	0	0	0	0	0	0	0	0	0	0	0
c97	1	3	a	8	0	0	0	0	0	0	0	0	0	0	0	0	0	0	0	0	0	0	0	0	0	0	0	0	0	0	0	0	0	0	0	0	0	0	0	0	0	0	0	0	0	0	0	0	0
c98	1	3	b	8.5	51	0	0	0	0	0	0	0	0	0	0	0	0	0	0	0	0	0	0	0	0	0	0	0	0	0	0	0	0	0	0	0	0	0	0	0	0	0	0	0	0	0	0	0	0
c99	1	3	c	9.5	204	0	0	0	0	0	0	0	0	3	0	0	0	0	0	0	0	0	0	0	0	0	0	0	0	0	0	0	0	0	0	0	0	1	0	0	0	0	0	0	0	0	0	0	0
c100	1	3	d	9.2	-76	0	0	0	0	0	0	0	0	0	0	0	0	0	0	0	0	0	0	0	0	0	0	0	0	0	0	0	0	0	0	0	0	0	0	0	0	0	0	0	0	0	0	0	0
c101	1	3	e	8	404	0	0	0	0	0	0	0	0	2	0	0	0	0	0	0	0	0	0	0	0	0	0	0	0	0	0	0	0	0	0	0	0	0	0	0	0	0	0	0	0	0	0	0	0
c102	1	3	f	9	500	0	0	0	0	0	0	0	0	0	0	0	0	0	0	0	0	0	0	0	0	0	0	0	0	0	0	0	0	0	0	0	0	0	0	0	0	0	0	0	0	0	0	0	0
c103	1	3	g	10	-306	0	0	0	0	0	0	0	0	0	0	0	0	0	0	0	0	0	0	0	0	0	0	0	0	0	0	0	0	0	0	0	0	0	0	0	0	0	0	0	0	0	0	0	0
c104	1	3	h	10.5	357	77	55	8	52	74	0	42	4	21052	6	20	1	352	28	4	35	20	67	1	7	1	3	9	183	1	2	99	80	0	43	0	0	851	21	10	241	6	0	3	12	3	3	0	0
c105	1	4	a	12	0	14	4	1	5	19	1	35	0	12197	2	1	6	11	22	2	0	2	19	0	85	0	1	1	93	2	0	9	8	0	0	3	8	101	1	4	28	1	0	0	9	2	0	0	1
c106	1	4	b	12.5	51	18	37	1	18	33	0	4	0	24031	0	5	1	11	8	0	3	2	21	0	7	1	4	3	149	8	3	10	9	1	1	2	0	456	0	7	58	3	9	0	16	1	0	1	0
c107	1	4	c	13.5	204	54	12	3	38	559	0	6	0	49477	1	8	1	13	7	0	16	6	41	0	12	13	0	6	296	1	1	9	12	0	3	1	0	167	4	10	114	7	1	0	30	3	4	2	0
c108	1	4	d	13.2	-76	8	4	0	1	5	0	1	0	1577	0	2	0	8	0	0	0	1	11	0	1	0	0	1	24	0	1	5	7	0	1	0	0	49	0	1	16	0	0	0	1	1	0	0	1
c109	1	4	e	12	404	6	4	0	5	5	0	2	0	1353	0	2	0	3	2	0	2	1	12	0	5	2	1	0	47	0	0	8	70	0	1	0	0	70	0	1	19	0	0	1	2	0	0	0	0
c110	1	4	f	13	500	0	0	0	0	0	0	0	0	8	0	0	0	0	0	0	0	0	0	0	0	0	0	0	0	0	0	0	0	0	0	0	0	1	0	0	0	0	0	0	0	0	0	0	0
c111	1	4	g	14	-306	5	4	0	5	7	26	3	0	1436	1	2	0	4	6	0	2	0	13	0	6	1	2	5	45	0	1	7	13	0	1	1	0	115	0	2	17	0	0	0	0	0	0	0	1
c112	1	4	h	14.5	357	2	6	3	3	11	22	0	0	1367	0	4	0	3	1	0	0	0	13	0	5	0	0	2	41	0	0	5	9	0	0	0	0	96	1	4	16	0	0	0	4	0	1	0	0
c113	1	5	a	9	800	10	4	0	10	7	1	2	0	3488	0	3	0	21	4	0	3	2	23	0	2	0	1	2	67	0	1	9	20	0	4	0	0	182	2	3	26	1	1	0	0	1	0	0	0
c114	1	5	b	12.5	851	8	9	1	13	27	1	4	0	3634	1	2	0	5	6	0	2	3	36	0	7	0	1	5	108	0	0	6	241	1	4	0	0	185	7	3	52	0	0	0	5	2	0	0	0
c115	1	5	c	13.5	1004	7	11	0	10	12	0	0	1	2487	0	7	0	9	6	0	3	3	25	0	5	0	0	3	78	0	0	11	179	0	2	0	1	131	3	1	32	0	0	0	5	1	0	0	0
c116	1	5	d	13.2	724	6	24	0	18	7	0	8	0	2049	0	12	1	9	9	0	2	4	39	0	6	0	3	3	96	2	1	9	12	1	4	3	0	413	7	3	69	0	0	0	2	1	0	0	0
c117	1	5	e	12	1204	12	9	0	14	16	1	6	0	5895	0	4	0	10	6	0	4	4	17	0	6	1	2	2	75	1	0	12	20	0	0	2	1	2169	8	7	107	2	1	0	5	3	0	0	0
c118	1	5	f	13	1300	25	122	1	131	17	6	28	2	1860	1	45	0	16	18	0	12	36	85	0	2	1	0	30	354	0	3	13	51	0	5	0	0	266	16	5	399	0	0	2	5	3	1	0	0
c119	1	5	g	14	494	7	8	0	10	7	0	0	0	1760	0	1	1	6	7	2	1	0	108	0	4	0	0	5	1318	2	0	5	14	0	0	1	1	3610	1	7	99	0	0	6	1	0	1	0	0
c120	1	5	h	14.5	1157	12	44	1	29	8	4	9	0	2882	0	11	2	8	38	0	4	13	917	0	3	2	0	10	4652	6	1	16	16	1	2	0	0	4834	5	14	310	1	0	14	4	2	0	0	0
c121	1	6	a	8	800	50	55	3	96	35	2	9	8	5295	23	28	3	113	13	14	10	24	125	0	653	1	3	38	235	3	5	30	487	0	8	18	2	715	6	30	1034	1	5	1	3	2	2	1	0
c122	1	6	b	8.5	851	1	2	0	0	9	0	0	0	773	0	0	0	0	0	0	0	1	2	0	0	0	0	0	8	0	0	0	5	0	0	0	0	1	0	1	5	0	0	0	1	0	0	0	0
c123	1	6	c	9.5	1004	20	29	3	19	14	1	4	0	9872	0	7	0	11	9	0	0	8	36	0	4	0	7	3	125	2	1	18	20	2	0	4	0	4974	6	12	202	0	2	2	5	4	2	0	0
c124	1	6	d	9.2	724	0	0	0	0	0	0	0	0	1	0	0	0	0	0	0	0	0	0	0	0	0	0	0	0	0	0	0	0	0	0	0	0	0	0	0	0	0	0	0	0	0	0	0	0
c125	1	6	e	8	1204	3	4	0	4	5	0	3	0	807	1	0	0	3	2	0	0	1	11	0	16	0	0	0	23	0	1	3	18	0	1	1	0	59	0	1	27	0	0	0	1	0	0	0	0
c126	1	6	f	9	1300	3	13	2	13	7	1	0	0	1547	1	3	0	3	8	0	1	4	18	0	1	0	2	2	62	0	1	68	12	0	0	0	0	128	4	5	47	0	0	0	0	1	0	0	0
c127	1	6	g	10	494	8	27	0	30	10	0	7	0	1148	0	15	0	6	6	0	3	5	18	0	1	1	0	14	131	1	1	7	13	0	3	0	0	130	2	3	80	0	0	0	1	0	1	0	0
c128	1	6	h	10.5	1157	30	10	0	7	7	0	2	0	34867	0	1	2	14	5	7	1	6	21	0	4	0	0	1	148	1	0	7	16	1	0	1	1	150	1	12	61	1	0	0	21	6	3	2	0
c129	1	7	a	4	800	2	4	0	9	9	0	3	0	1211	1	2	0	3	7	0	4	0	4	0	6	0	0	0	24	0	0	3	14	0	0	0	1	105	2	1	12	0	0	1	0	2	0	0	0
c130	1	7	b	4.5	851	10	6	1	32	13	0	3	0	1343	0	1	1	3	4	0	3	3	11	0	1	0	0	3	30	0	0	0	2	0	0	1	7	65	2	7	42	0	0	0	1	1	0	0	0
c131	1	7	c	5.5	1004	2	3	1	62	3	5	0	0	914	0	3	0	0	4	0	2	0	3	0	3	0	0	3	32	0	0	4	15	0	1	0	0	66	0	2	15	1	0	0	1	0	0	0	0
c132	1	7	d	5.2	724	40	8	3	4	14	2	3	0	23443	4	7	9	16	11	5	32	3	66	0	4	1	0	1	173	2	2	9	6	2	0	0	1	85	4	27	75	1	0	0	14	3	1	1	0
c133	1	7	e	4	1204	12	6	4	593	22	0	5	0	2700	0	3	0	8	12	2	6	4	57	0	8	4	1	14	75	1	3	24	21	1	5	1	4	213	3	67	192	0	0	0	11	1	5	0	0
c134	1	7	f	5	1300	24	8	2	7	57	0	71	1	10001	2	1	45	5	1048	20	1	2	35	0	3	0	1	9	67	7	0	14	6	38	1	12	6	93	3	6	92	1	1	0	15	2	1	1	0
c135	1	7	g	6	494	169	67	10	73	979	0	23	0	140390	2	9	1	33	11	0	21	21	85	0	11	27	0	5	870	3	1	13	15	0	0	2	1	247	4	28	302	4	2	0	120	1	11	0	2
c136	1	7	h	6.5	1157	4	7	1	11	4	1	0	0	1011	0	6	0	2	6	1	1	2	11	0	2	0	0	0	45	0	1	7	11	0	0	0	0	83	1	1	17	0	0	0	0	0	0	0	0
c137	1	8	a	4	1600	2	4	0	11	3	0	1	0	1050	0	0	0	2	5	0	0	1	6	0	2	0	0	1	21	1	0	6	7	0	1	1	0	52	0	2	12	0	0	0	0	0	0	0	0
c138	1	8	b	4.5	1651	5	2	0	1	0	0	0	1	2131	0	0	1	1	3	0	0	0	6	0	2	0	1	2	27	1	0	2	2	0	0	0	0	270	0	1	3	0	0	0	2	0	0	0	0
c139	1	8	c	5.5	1804	3	4	0	9	5	1	1	0	1086	0	0	0	3	5	1	0	1	9	0	3	0	0	2	34	0	0	3	4	0	0	1	0	84	1	0	21	2	0	0	0	0	0	0	0
c140	1	8	d	5.2	1524	7	2	0	3	3	26	1	0	1054	0	0	0	4	2	0	2	0	16	0	4	2	0	1	31	0	0	7	9	0	1	0	2	85	0	2	18	0	0	0	0	0	0	0	0
c141	1	8	e	4	2004	2	21	0	4	3	0	1	0	970	0	0	1	4	4	1	0	0	15	0	2	0	0	2	51	2	1	2	14	0	1	0	1	54	0	2	22	1	1	1	1	0	0	0	0
c142	1	8	f	5	2100	9	2	0	10	3	0	2	0	1551	1	0	0	5	3	3	0	1	9	0	4	0	0	0	32	0	0	6	8	0	0	0	0	96	1	1	18	1	0	1	0	63	0	0	1
c143	1	8	g	6	1294	4	0	0	11	5	0	2	0	1429	0	2	0	3	4	0	0	1	7	0	21	0	0	2	31	0	0	23	11	0	1	0	0	72	1	2	19	0	0	0	2	0	0	0	0
c144	1	8	h	6.5	1957	6	1	1	5	4	0	1	1	2705	0	0	0	2	3	0	0	0	13	0	2	1	0	0	39	0	2	6	5	2	64	0	0	68	1	2	18	1	0	0	1	0	0	0	0
c145	1	9	a	8	1600	1	0	0	1	0	0	0	0	108	0	0	0	0	0	0	0	0	0	0	0	0	0	0	0	0	0	1	3	0	0	0	0	0	0	0	0	0	0	0	0	0	0	0	0
c146	1	9	b	8.5	1651	1	2	1	2	2	0	0	0	524	0	0	0	0	0	0	0	0	7	0	0	0	0	0	4	1	0	0	11	0	0	0	0	2	0	1	2	0	0	0	2	0	0	0	0
c147	1	9	c	9.5	1804	8	39	0	41	27	1	6	4	5579	1	10	0	7	9	2	1	6	81	0	3	3	1	10	136	2	2	12	516	0	5	0	0	171	4	11	103	0	0	0	4	0	0	0	0
c148	1	9	d	9.2	1524	8	2	5	6	0	0	1	0	1243	0	0	0	2	1	38	0	0	44	0	0	0	47	1	13	0	0	8	1	0	0	0	0	31	0	18	21	1	0	0	1	2	2	1	1
c149	1	9	e	8	2004	8	3	0	28	0	0	0	1	33	1	24	0	49	22	0	6	8	5	0	0	0	0	13	103	0	1	9	21	0	4	0	0	72	10	4	70	0	0	1	0	1	9	0	0
c150	1	9	f	9	2100	1	0	0	0	0	0	0	0	21	0	0	0	1	0	0	0	0	0	0	0	0	0	0	0	0	0	0	0	0	0	0	2	1	0	2	1	0	0	0	0	0	0	0	0
c151	1	9	g	10	1294	0	0	0	0	0	0	0	0	0	0	0	0	0	0	0	0	0	0	0	0	0	0	0	0	0	0	0	0	0	0	0	0	0	0	0	0	0	0	0	0	0	0	0	0
c152	1	9	h	10.5	1957	0	0	0	0	0	0	0	0	23	0	0	0	0	0	0	0	0	0	0	0	0	0	0	1	0	0	0	0	0	0	0	0	3	0	1	0	0	0	0	0	0	0	0	0
c153	1	10	a	12	1600	0	0	2	0	0	4	0	0	19	0	0	0	0	0	0	0	0	0	0	0	0	0	0	0	0	0	0	1	0	0	0	0	0	0	0	35	0	0	0	0	0	0	1	0
c154	1	10	b	12.5	1651	0	0	0	0	0	0	0	0	11	0	0	0	0	0	0	0	0	0	0	0	0	1	0	3	0	0	0	0	0	1	0	0	1	1	1	0	0	0	0	0	0	0	0	0
c155	1	10	c	13.5	1804	0	0	0	0	0	0	0	0	0	0	0	0	0	0	0	0	0	0	0	0	0	0	0	0	0	0	0	0	0	0	0	0	0	0	0	0	0	0	0	0	0	0	0	0
c156	1	10	d	13.2	1524	0	0	0	0	0	0	0	0	12	0	0	0	0	0	1	0	0	1	0	0	0	0	0	1	0	0	0	1	0	0	0	1	1	0	1	2	0	0	0	0	0	0	0	0
c157	1	10	e	12	2004	0	0	0	2	0	0	0	0	57	0	1	0	1	1	0	0	0	0	0	0	0	0	0	3	0	0	1	0	0	0	0	0	0	0	1	2	0	0	0	0	0	0	0	0
c158	1	10	f	13	2100	0	0	0	0	0	0	0	0	25	0	0	0	0	0	1	0	0	3	0	0	0	0	1	2	0	0	0	3	0	0	0	1	2	0	1	0	0	0	0	0	0	0	0	0
c159	1	10	g	14	1294	0	0	0	0	0	0	1	0	27	0	0	0	0	0	0	0	0	1	0	0	0	0	0	3	0	0	0	1	0	0	0	86	6	0	0	6	0	0	0	0	1	0	0	0
c160	1	10	h	14.5	1957	3	0	0	2	0	0	0	0	17	0	0	0	2	1	4	1	1	1	0	2	0	1	2	44	0	0	0	10	2	2	0	1	9	1	1	23	0	0	1	0	0	0	0	0
c161	11	1	a	0	0	0	0	0	0	1	0	0	0	10	0	0	0	1	2	0	0	0	0	0	0	0	0	0	2	0	0	0	0	0	0	0	0	2	0	0	6	0	0	0	0	0	2	0	0
c162	11	1	b	0.5	51	1	1	0	0	0	0	1	0	41	0	0	0	1	2	1	0	0	0	0	0	0	0	0	3	0	0	2	1	0	0	0	139	6	0	2	7	1	1	0	0	0	0	0	0
c163	11	1	c	1.5	204	2	3	1	0	0	0	0	0	669	0	0	0	4	0	1	0	1	7	0	0	0	1	0	21	1	0	1	2	4	2	0	1	15	0	5	8	0	0	0	0	0	0	0	0
c164	11	1	d	1.2	-76	10	0	0	0	2	0	0	0	123	0	1	0	1	2	0	0	1	3	0	3	0	1	0	8	0	0	0	2	0	1	0	21	6	2	1	5	1	0	0	0	0	0	0	0
c165	11	1	e	0	404	1	1	1	1	0	0	1	0	962	0	0	0	2	0	0	0	0	0	0	0	1	0	0	9	1	0	0	0	0	0	0	0	1	0	12	11	1	0	0	0	0	0	0	0
c166	11	1	f	1	500	0	0	0	0	0	0	0	0	78	0	0	0	0	1	0	3	0	2	0	1	0	1	0	2	0	0	0	1	0	1	0	0	1	1	1	4	0	0	0	0	12	0	0	0
c167	11	1	g	2	-306	0	0	2	0	0	0	3	0	163	0	1	0	6	1	0	2	0	1	0	0	0	0	4	2	0	0	4	1	0	0	0	2	3	0	2	4	0	0	0	0	2	0	0	0
c168	11	1	h	2.5	357	26	1	2	3	3	0	5	1	494	0	4	0	8	18	0	0	8	13	1	5	1	4	8	30	1	1	18	19	0	2	0	20	44	3	2	55	0	0	0	1	0	2	1	1
c169	11	2	a	4	0	19	29	0	13	7	0	5	1	140	7	17	4	17	14	0	7	8	32	0	0	0	1	9	77	4	3	3	55	0	2	0	1	45	4	8	104	2	3	0	1	1	4	4	0
c170	11	2	b	4.5	51	21	8	0	37	2	1	1	0	516	3	28	2	31	33	4	7	6	56	0	49	0	1	29	116	1	2	19	168	0	4	0	1	135	7	17	118	0	2	2	0	0	5	0	0
c171	11	2	c	5.5	204	0	0	0	0	0	0	0	0	1	0	0	0	0	0	0	0	0	0	0	0	0	0	0	0	0	0	0	0	0	0	0	0	1	0	1	0	0	0	0	0	0	0	0	0
c172	11	2	d	5.2	-76	0	0	0	1	0	0	1	0	19	0	0	0	0	0	0	1	0	0	0	0	0	0	0	1	0	0	0	0	0	0	0	0	2	0	1	0	0	0	0	0	0	0	0	0
c173	11	2	e	4	404	0	0	0	0	0	0	0	0	7	0	0	0	0	0	0	0	0	0	0	0	0	0	0	7	0	0	0	1	0	0	0	0	2	0	0	2	0	0	0	0	0	0	0	0
c174	11	2	f	5	500	1	0	0	1	0	0	0	0	31	0	2	0	0	2	0	0	0	1	0	1	0	0	1	5	0	0	1	6	0	0	0	0	5	0	1	7	0	0	0	0	0	0	0	0
c175	11	2	g	6	-306	0	0	0	0	0	0	0	0	262	0	0	0	0	0	0	0	0	0	0	0	0	0	0	0	0	0	0	0	0	0	0	0	1	0	3	1	0	0	0	0	0	0	0	0
c176	11	2	h	6.5	357	0	0	1	1	0	0	0	0	277	0	0	0	1	0	0	1	1	0	0	0	0	0	0	8	0	0	0	2	0	0	0	1	3	0	2	10	0	0	0	0	0	0	0	0
c177	11	3	a	8	0	0	0	0	0	1	0	0	0	11	0	0	0	1	1	1	0	0	2	0	0	0	0	0	2	0	0	0	0	0	0	0	0	1	0	0	2	0	0	0	0	0	0	0	0
c178	11	3	b	8.5	51	1	0	0	0	2	0	1	0	67	0	0	0	1	0	0	0	0	0	0	0	0	0	0	1	0	0	0	0	0	0	0	2	1	0	1	2	0	0	0	0	0	0	0	2
c179	11	3	c	9.5	204	0	3	0	4	0	0	0	0	55	2	1	0	3	0	0	0	1	2	0	0	0	0	2	8	0	0	0	1	0	2	0	0	4	0	2	3	0	0	0	0	0	1	0	0
c180	11	3	d	9.2	-76	0	0	0	0	0	0	0	0	12	0	0	0	0	0	0	0	0	0	0	0	0	0	0	1	0	0	0	0	0	0	0	1	0	0	2	4	0	0	0	0	0	0	0	0
c181	11	3	e	8	404	0	0	0	0	0	0	0	0	92	0	0	0	0	0	0	0	0	1	0	0	1	0	0	1	0	0	0	1	0	0	0	0	2	0	0	1	1	0	0	0	0	0	0	0
c182	11	3	f	9	500	0	0	0	0	0	0	0	0	1	0	0	0	0	0	0	0	0	0	0	0	0	0	0	0	0	0	0	0	0	0	0	0	0	0	0	0	0	0	0	0	0	0	0	0
c183	11	3	g	10	-306	0	0	0	0	0	0	0	0	5	0	0	0	0	1	1	0	0	0	0	0	0	0	0	2	0	0	0	1	0	0	0	0	1	0	0	0	0	0	0	0	0	0	0	0
c184	11	3	h	10.5	357	2	0	0	2	0	0	2	0	116	0	2	0	2	4	0	0	0	16	0	2	0	0	3	609	7	1	1	9	0	0	6	4	424	0	22	60	0	2	0	0	0	0	0	0
c185	11	4	a	12	0	1	0	0	0	0	0	0	0	24	0	0	0	0	0	0	0	0	1	0	0	0	0	0	3	0	0	0	0	0	0	0	0	0	0	1	3	0	0	0	0	0	0	0	0
c186	11	4	b	12.5	51	0	0	0	0	0	0	0	0	11	0	0	0	0	0	0	0	0	0	0	1	0	0	1	0	0	0	1	2	0	0	0	0	0	0	0	0	0	0	0	0	0	0	0	0
c187	11	4	c	13.5	204	8	0	0	0	0	0	4	0	7580	0	0	0	3	0	0	0	1	16	0	0	0	0	0	21	3	0	3	0	0	0	1	1	5	0	81	214	6	0	0	2	1	2	0	0
c188	11	4	d	13.2	-76	0	0	0	3	0	1	1	0	41	0	0	0	1	0	0	0	0	1	0	0	1	0	0	4	0	0	1	0	0	0	0	0	2	0	1	10	0	0	0	0	0	0	0	0
c189	11	4	e	12	404	0	0	0	0	0	0	0	0	66	0	0	0	1	1	0	0	0	3	0	0	0	0	0	3	0	0	0	13	0	0	0	0	2	0	0	1	0	0	0	0	0	0	0	0
c190	11	4	f	13	500	2	0	0	0	0	0	0	0	26	0	0	0	0	0	0	2	0	0	0	0	0	0	1	2	0	1	2	2	0	0	0	2	0	0	0	3	0	0	0	0	0	0	0	0
c191	11	4	g	14	-306	1	0	0	0	0	4	0	0	12	0	0	0	0	0	0	0	0	0	0	0	0	0	2	2	1	0	1	1	0	0	0	2	2	0	1	27	0	0	0	0	0	0	0	0
c192	11	4	h	14.5	357	1	0	0	0	0	0	0	0	378	0	0	0	0	1	0	0	0	5	0	1	0	0	0	10	1	0	1	0	0	0	0	34	4	1	0	5	2	0	0	0	1	0	0	0
c193	11	5	a	9	800	4	12	0	1	2	0	2	0	62	1	2	0	10	6	0	9	2	7	0	1	0	0	5	26	1	0	3	15	0	0	0	1	19	0	1	42	0	0	1	0	1	0	0	0
c194	11	5	b	12.5	851	0	0	0	0	0	0	0	0	1	0	0	0	0	0	0	0	0	0	0	0	0	0	0	0	0	0	0	0	0	0	0	0	1	0	0	0	0	0	0	0	0	0	0	0
c195	11	5	c	13.5	1004	0	0	0	0	0	0	0	0	75	0	1	0	1	0	0	0	0	0	0	0	0	0	0	4	0	0	0	0	0	0	0	0	21	1	1	1	0	0	0	0	0	0	1	0
c196	11	5	d	13.2	724	0	0	0	0	0	0	0	0	0	0	0	0	0	0	0	0	0	0	0	0	0	0	0	0	0	0	0	0	0	0	0	0	0	0	0	0	0	0	0	0	0	0	0	0
c197	11	5	e	12	1204	0	0	0	0	0	0	0	0	0	0	0	0	0	0	0	0	0	0	0	0	0	0	0	0	0	0	0	0	0	0	0	0	0	0	0	0	0	0	0	0	0	0	0	0
c198	11	5	f	13	1300	0	0	0	0	0	0	0	0	1	0	0	0	0	0	0	0	0	0	0	0	0	0	0	0	0	0	0	0	0	0	0	0	0	0	0	0	0	0	0	0	0	0	0	0
c199	11	5	g	14	494	0	0	0	0	0	0	0	0	0	0	0	0	0	0	0	0	0	0	0	0	0	0	0	0	0	0	0	0	0	0	0	0	0	0	0	0	0	0	0	0	0	0	0	0
c200	11	5	h	14.5	1157	0	0	0	0	0	0	0	0	2	0	0	0	0	0	0	0	0	0	0	0	0	0	0	0	0	0	0	0	0	0	0	0	0	0	0	0	0	0	0	0	0	0	0	0
c201	11	6	a	8	800	0	0	0	0	0	0	0	0	0	0	0	0	0	0	0	0	0	0	0	0	0	0	0	0	0	0	0	0	0	0	0	0	0	0	0	0	0	0	0	0	0	0	0	0
c202	11	6	b	8.5	851	0	0	0	0	0	0	0	0	1	0	0	0	0	0	0	0	0	0	0	0	0	0	0	0	0	0	0	0	0	0	0	0	0	0	0	0	0	0	0	0	0	0	0	0
c203	11	6	c	9.5	1004	0	0	0	0	0	0	0	0	0	0	0	0	0	0	0	0	0	0	0	0	0	0	0	0	0	0	0	0	0	0	0	0	0	0	0	0	0	0	0	0	0	0	0	0
c204	11	6	d	9.2	724	0	0	0	0	0	0	0	0	0	0	0	0	0	0	0	0	0	0	0	0	0	0	0	0	0	0	0	0	0	0	0	0	0	0	0	0	0	0	0	0	0	0	0	0
c205	11	6	e	8	1204	0	0	0	0	0	0	0	0	0	0	0	0	0	0	0	0	0	0	0	0	0	0	0	0	0	0	0	0	0	0	0	0	0	0	0	0	0	0	0	0	0	0	0	0
c206	11	6	f	9	1300	0	0	0	0	0	0	0	0	1	0	0	0	0	0	0	0	0	0	0	0	0	0	0	0	0	0	0	0	0	0	0	0	0	0	0	0	0	0	0	0	0	0	0	0
c207	11	6	g	10	494	0	0	0	0	0	0	0	0	0	0	0	0	0	0	0	0	0	0	0	0	0	0	0	0	0	0	0	0	0	0	0	0	0	0	0	0	0	0	0	0	0	0	0	0
c208	11	6	h	10.5	1157	0	0	0	0	0	0	0	0	0	0	0	0	0	0	0	0	0	0	0	0	0	0	0	0	0	0	0	0	0	0	0	0	0	0	0	0	0	0	0	0	0	0	0	0
c209	11	7	a	4	800	0	0	0	0	0	0	0	0	2	0	0	0	0	0	0	0	0	0	0	0	0	0	0	0	0	0	0	0	0	0	0	0	0	0	0	0	0	0	0	0	0	0	0	0
c210	11	7	b	4.5	851	0	0	0	0	0	0	0	0	1	0	0	0	0	0	0	0	0	0	0	0	0	0	0	0	0	0	0	0	0	0	0	0	0	0	0	0	0	0	0	0	0	0	0	0
c211	11	7	c	5.5	1004	0	0	0	0	0	0	0	0	0	0	0	0	0	0	0	0	0	0	0	0	0	0	0	0	0	0	0	0	0	0	0	0	0	0	0	0	0	0	0	0	0	0	0	0
c212	11	7	d	5.2	724	0	0	0	0	0	0	0	0	0	0	0	0	0	0	0	0	0	0	0	0	0	0	0	0	0	0	0	0	0	0	0	0	0	0	0	0	0	0	0	0	0	0	0	0
c213	11	7	e	4	1204	0	0	0	0	0	0	0	0	0	0	0	0	0	0	0	0	0	0	0	0	0	0	0	0	0	0	0	0	0	0	0	0	0	0	0	0	0	0	0	0	0	0	0	0
c214	11	7	f	5	1300	0	0	0	0	0	0	0	0	2	0	0	0	0	0	0	0	0	0	0	0	0	0	0	0	0	0	0	0	0	0	0	0	0	0	0	0	0	0	0	0	0	0	0	0
c215	11	7	g	6	494	0	0	0	0	0	0	0	0	0	0	0	0	0	0	0	0	0	0	0	0	0	0	0	0	0	0	0	0	0	0	0	0	0	0	0	0	0	0	0	0	0	0	0	0
c216	11	7	h	6.5	1157	0	0	0	0	0	0	0	0	1	0	0	0	0	0	0	0	0	0	0	0	0	0	0	0	0	0	0	0	0	0	0	0	0	0	0	0	0	0	0	0	0	0	0	0
c217	11	8	a	4	1600	0	0	0	0	0	0	0	0	0	0	0	0	0	0	0	0	0	0	0	0	0	0	0	0	0	0	0	0	0	0	0	0	0	0	0	1	0	0	0	0	0	0	0	0
c218	11	8	b	4.5	1651	0	0	0	0	0	0	0	0	2	0	0	0	0	0	0	0	0	0	0	0	0	0	0	0	0	0	0	0	0	0	0	0	0	0	0	0	0	0	0	0	0	0	0	0
c219	11	8	c	5.5	1804	0	0	0	0	0	0	0	0	1	0	0	0	0	0	0	0	0	0	0	0	0	0	0	0	0	0	0	0	0	0	0	0	0	0	0	0	0	0	0	0	0	0	0	0
c220	11	8	d	5.2	1524	0	0	0	0	0	0	0	0	0	0	0	0	0	0	0	0	0	0	0	0	0	0	0	0	0	0	0	0	0	0	0	0	0	0	0	0	0	0	0	0	0	0	0	0
c221	11	8	e	4	2004	0	0	0	0	0	0	0	0	0	0	0	0	0	0	0	0	0	0	0	0	0	0	0	0	0	0	0	0	0	0	0	0	0	0	0	0	0	0	0	0	0	0	0	0
c222	11	8	f	5	2100	0	0	0	0	0	0	0	0	0	0	0	0	0	0	0	0	0	0	0	0	0	0	0	0	0	0	0	0	0	0	0	0	0	0	0	0	0	0	0	0	0	0	0	0
c223	11	8	g	6	1294	0	0	0	0	0	0	0	0	0	0	0	0	0	0	0	0	0	0	0	0	0	0	0	0	0	0	0	0	0	0	0	0	0	0	0	0	0	0	0	0	0	0	0	0
c224	11	8	h	6.5	1957	0	0	0	0	0	0	0	0	0	0	0	0	0	0	0	0	0	0	0	0	0	0	0	0	0	0	0	0	0	0	0	0	0	0	0	0	0	0	0	0	0	0	0	0
c225	11	9	a	8	1600	0	0	0	0	0	0	0	0	0	0	0	0	0	0	0	0	0	0	0	0	0	0	0	0	0	0	0	0	0	0	0	0	0	0	0	0	0	0	0	0	0	0	0	0
c226	11	9	b	8.5	1651	0	0	0	0	0	0	0	0	0	0	0	0	0	0	0	0	0	0	0	0	0	0	0	0	0	0	0	0	0	0	0	0	0	0	0	0	0	0	0	0	0	0	0	0
c227	11	9	c	9.5	1804	0	0	0	0	0	0	0	0	0	0	0	0	0	0	0	0	0	0	0	0	0	0	0	0	0	0	0	0	0	0	0	0	0	0	0	0	0	0	0	0	0	0	0	0
c228	11	9	d	9.2	1524	0	0	0	0	0	0	0	0	1	0	0	0	0	0	0	0	0	0	0	0	0	0	0	0	0	0	0	0	0	0	0	0	0	0	0	0	0	0	0	0	0	0	0	0
c229	11	9	e	8	2004	0	0	0	0	0	0	0	0	0	0	0	0	0	0	0	0	0	0	0	0	0	0	0	0	0	0	0	0	0	0	0	0	0	0	0	0	0	0	0	0	0	0	0	0
c230	11	9	f	9	2100	0	0	0	0	0	0	0	0	0	0	0	0	0	0	0	0	0	0	0	0	0	0	0	0	0	0	0	0	0	0	0	0	0	0	0	0	0	0	0	0	0	0	0	0
c231	11	9	g	10	1294	0	0	0	0	0	0	0	0	0	0	0	0	0	0	0	0	0	0	0	0	0	0	0	0	0	0	0	0	0	0	0	0	0	0	0	0	0	0	0	0	0	0	0	0
c232	11	9	h	10.5	1957	0	0	0	0	0	0	0	0	0	0	0	0	0	0	0	0	0	0	0	0	0	0	0	0	0	0	0	0	0	0	0	0	0	0	0	0	0	0	0	0	0	0	0	0
c233	11	10	a	12	1600	0	0	0	0	0	0	0	0	0	0	0	0	0	0	0	0	0	0	0	0	0	0	0	0	0	0	0	0	0	0	0	0	0	0	0	0	0	0	0	0	0	0	0	0
c234	11	10	b	12.5	1651	0	0	0	0	0	0	0	0	0	0	0	0	0	0	0	0	0	0	0	0	0	0	0	0	0	0	0	0	0	0	0	0	0	0	0	0	0	0	0	0	0	0	0	0
c235	11	10	c	13.5	1804	0	0	0	0	0	0	0	0	0	0	0	0	0	0	0	0	0	0	0	0	0	0	0	0	0	0	0	0	0	0	0	0	0	0	0	0	0	0	0	0	0	0	0	0
c236	11	10	d	13.2	1524	0	0	0	0	0	0	0	0	0	0	0	0	0	0	0	0	0	0	0	0	0	0	0	0	0	0	0	0	0	0	0	0	0	0	0	0	0	0	0	0	0	0	0	0
c237	11	10	e	12	2004	0	0	0	0	0	0	0	0	0	0	0	0	0	0	0	0	0	0	0	0	0	0	0	0	0	0	0	0	0	0	0	0	0	0	0	0	0	0	0	0	0	0	0	0
c238	11	10	f	13	2100	70	16	16	17	13	1	22	4	4215	3	5	1	24	195	4	1	5	73	0	43	3	2	4	262	1	3	1055	9	1	10	9	6	141	5	8	77	0	1	1	15	8	1	0	4
c239	11	10	g	14	1294	104	24	14	35	19	0	19	1	4433	5	9	0	43	280	6	2	7	100	1	42	8	8	4	307	0	0	1628	15	1	9	22	3	159	7	5	102	0	0	0	20	4	2	0	20
c240	11	10	h	14.5	1957	0	0	0	0	0	0	0	0	52	0	0	0	0	0	0	0	0	0	0	0	0	0	0	0	0	0	0	1	0	0	0	0	2	0	0	1	0	0	0	0	0	0	0	0
c241	9	1	a	0	0	23	179	0	140	3	2	35	2	1049	0	67	0	13	15	0	7	43	31	0	5	1	0	28	445	0	3	8	22	0	7	0	0	243	20	8	218	0	0	1	0	0	0	0	0
c242	9	1	b	0.5	51	39	206	0	83	15	0	23	1	5984	0	59	0	16	17	4	26	32	156	0	5	3	6	35	500	1	20	8	986	3	11	0	0	289	16	24	329	1	0	1	25	1	0	0	0
c243	9	1	c	1.5	204	0	0	0	0	0	0	0	0	6	0	0	0	0	0	0	0	0	0	0	0	0	0	0	1	0	0	0	0	0	0	0	0	5	0	0	0	0	0	0	0	0	0	0	0
c244	9	1	d	1.2	-76	0	0	0	0	0	0	0	0	11	0	0	0	0	0	0	0	0	0	0	0	0	0	0	0	0	0	0	0	0	0	0	0	3	0	0	0	0	0	0	0	0	0	0	0
c245	9	1	e	0	404	0	0	0	0	0	0	0	0	15	0	0	0	0	0	0	0	0	0	0	0	0	0	0	0	0	0	0	0	0	0	0	0	8	0	0	1	0	1	0	0	0	0	0	0
c246	9	1	f	1	500	2	0	0	1	4	0	0	0	529	0	0	0	0	1	0	0	0	2	0	0	0	0	1	3	0	0	0	3	0	0	0	0	1	0	1	1	0	0	0	0	0	0	0	0
c247	9	1	g	2	-306	0	0	0	0	0	0	0	0	1	0	0	0	0	0	0	0	0	0	0	0	0	0	0	0	0	0	0	0	0	0	0	0	0	0	0	0	0	0	0	0	0	0	0	0
c248	9	1	h	2.5	357	0	0	0	0	2	0	0	0	281	0	0	0	0	0	0	0	0	2	0	0	0	0	0	2	0	0	0	4	0	1	1	0	2	0	0	0	0	0	0	0	0	0	0	0
c249	9	2	a	4	0	0	0	0	0	0	0	0	0	1	0	0	0	0	0	0	0	0	0	0	0	0	0	0	0	0	0	0	0	0	0	0	0	0	0	0	0	0	0	0	0	0	0	0	0
c250	9	2	b	4.5	51	0	0	0	0	0	0	0	0	11	0	0	0	0	0	0	0	0	0	0	0	0	0	0	0	0	0	0	0	0	0	0	0	0	0	0	0	0	0	0	0	0	0	0	0
c251	9	2	c	5.5	204	0	0	0	0	0	0	0	0	126	0	0	0	0	0	0	0	0	0	0	0	0	0	0	2	0	0	0	1	0	0	0	0	0	0	0	0	0	0	0	0	0	0	0	0
c252	9	2	d	5.2	-76	0	0	0	0	0	0	0	0	16	0	0	0	0	0	0	0	0	0	0	1	0	0	0	0	0	0	0	0	0	0	0	0	1	0	0	0	0	0	0	0	0	0	0	0
c253	9	2	e	4	404	0	0	0	0	1	0	0	0	49	0	0	0	0	0	0	0	0	0	0	0	0	0	0	0	0	0	0	2	0	0	0	0	2	0	0	0	0	0	0	0	0	0	0	0
c254	9	2	f	5	500	0	0	0	0	0	0	0	0	276	0	0	0	0	0	0	0	0	0	0	0	0	0	0	7	0	0	0	2	0	0	0	0	3	0	0	0	0	0	0	0	0	0	0	0
c255	9	2	g	6	-306	0	1	0	0	2	0	0	0	296	0	0	0	0	0	0	0	0	0	0	0	0	0	0	2	0	0	0	1	0	0	0	0	0	0	0	0	0	0	0	0	0	0	0	0
c256	9	2	h	6.5	357	0	0	0	0	4	0	0	0	246	0	0	0	0	0	0	0	0	0	0	0	0	0	0	3	0	0	0	1	0	0	0	0	1	0	0	0	0	0	0	1	0	0	0	0
c257	9	3	a	8	0	0	0	0	1	2	0	0	0	227	0	0	0	0	0	0	0	0	0	0	0	0	0	0	0	0	0	0	0	0	0	0	0	0	0	0	0	0	0	0	1	0	0	0	0
c258	9	3	b	8.5	51	0	0	0	0	1	0	0	0	48	0	0	0	0	0	0	0	0	0	0	0	0	0	0	0	0	0	0	0	0	0	0	0	0	0	0	0	0	0	0	0	0	0	0	0
c259	9	3	c	9.5	204	0	0	0	0	0	0	0	0	21	0	0	0	0	0	0	0	0	0	0	0	0	0	0	0	0	0	0	0	0	0	0	0	1	0	0	0	0	0	0	0	0	0	0	0
c260	9	3	d	9.2	-76	0	0	0	0	0	0	0	0	0	0	0	0	0	0	0	0	0	0	0	0	0	0	0	0	0	0	0	0	0	0	0	0	0	0	0	0	0	0	0	0	0	0	0	0
c261	9	3	e	8	404	0	0	0	0	0	0	0	0	104	0	0	0	0	0	0	0	0	0	0	0	0	0	0	1	0	0	0	0	0	0	0	0	7	0	0	1	0	0	0	0	0	0	0	0
c262	9	3	f	9	500	0	0	0	0	0	0	0	0	2	0	0	0	0	0	0	0	0	0	0	0	0	0	0	0	0	0	0	0	0	0	0	0	0	0	0	0	0	0	0	0	0	0	0	0
c263	9	3	g	10	-306	0	0	0	0	0	0	0	0	3	0	0	0	0	0	0	0	0	0	0	0	0	0	0	0	0	0	0	0	0	0	0	0	0	0	0	0	0	0	0	0	0	0	0	0
c264	9	3	h	10.5	357	0	0	0	0	0	0	0	0	12	0	0	0	0	0	0	0	0	0	0	0	0	0	0	0	0	0	0	0	0	0	0	0	1	0	0	0	0	0	0	0	0	0	0	0
c265	9	4	a	12	0	0	0	0	0	0	0	0	0	21	0	0	0	0	0	0	0	0	0	0	0	0	0	0	1	0	0	0	0	0	0	0	0	2	0	0	0	0	0	0	0	0	0	0	0
c266	9	4	b	12.5	51	72	98	0	257	3	2	6	1	1485	2	286	0	60	62	0	31	126	50	0	0	4	0	236	1074	1	1	12	36	0	30	0	0	1304	27	11	1060	0	1	2	3	2	11	0	3
c267	9	4	c	13.5	204	6	1	0	1	0	0	1	0	45	0	1	0	0	2	0	2	0	93	1	0	1	0	1	75	0	0	0	1	6	6	0	2	17	0	5	50	2	1	0	0	1	2	4	0
c268	9	4	d	13.2	-76	0	0	0	0	0	0	0	0	16	0	0	0	0	0	0	0	3	1	0	0	0	0	0	0	0	0	0	0	0	0	0	0	3	0	0	2	0	0	0	0	0	0	0	0
c269	9	4	e	12	404	0	0	0	0	0	0	0	0	10	0	0	0	0	0	0	0	0	0	0	0	0	0	0	0	0	0	0	0	0	0	0	0	0	0	0	4	0	0	0	0	0	0	0	0
c270	9	4	f	13	500	0	0	0	0	0	0	0	0	5	0	1	0	0	0	0	0	1	1	0	0	0	0	0	1	0	0	0	0	0	0	0	0	2	0	0	2	0	0	0	0	0	0	0	0
c271	9	4	g	14	-306	0	0	0	0	0	0	0	0	28	0	0	0	0	0	0	0	1	3	0	0	0	0	0	5	0	0	0	0	0	0	0	0	0	0	0	2	0	0	0	0	0	0	0	0
c272	9	4	h	14.5	357	1	1	0	3	1	0	0	0	520	0	0	0	0	39	3	0	6	1	1	0	0	0	0	12	4	0	2	1	0	0	6	1	6	0	5	11	0	0	0	0	0	0	0	0
c273	9	5	a	9	800	0	0	0	0	0	0	0	0	16	0	0	0	0	0	0	0	0	7	0	0	0	2	1	7	0	0	0	0	0	0	0	0	3	0	0	4	0	0	0	0	0	0	0	0
c274	9	5	b	12.5	851	1	1	0	0	1	0	2	0	218	0	0	0	0	27	3	0	3	1	0	0	0	0	0	5	4	0	0	0	0	0	3	1	3	0	1	8	0	0	0	0	0	0	0	0
c275	9	5	c	13.5	1004	1	1	0	1	0	0	2	1	52	0	1	0	0	0	0	1	2	1	0	0	0	0	0	7	0	0	0	0	0	1	0	2	4	0	0	2	0	0	0	0	0	0	0	0
c276	9	5	d	13.2	724	0	0	0	0	0	0	0	0	7	0	0	0	0	0	0	0	0	0	0	0	0	0	0	0	0	0	0	0	0	0	0	0	1	0	1	1	0	0	0	0	0	0	0	0
c277	9	5	e	12	1204	0	0	0	0	0	0	0	0	21	0	0	0	1	1	0	1	3	1	0	0	0	0	0	4	0	0	0	0	0	0	0	0	4	0	1	3	0	0	0	0	0	0	0	0
c278	9	5	f	13	1300	20	2	0	121	37	0	52	3	1531	1	10	12	13	7	0	25	12	44	5	0	0	3	6	146	0	1	5	5	0	3	2	24	64	3	68	112	0	19	0	3	1	0	2	1
c279	9	5	g	14	494	2	0	0	3	12	0	14	0	997	2	0	0	2	150	3	0	1	2	0	1	0	0	1	16	4	0	2	2	0	0	24	2	5	0	13	20	0	0	0	2	0	0	0	0
c280	9	5	h	14.5	1157	0	0	0	0	0	0	0	0	0	0	0	0	0	0	0	0	0	0	0	0	0	0	0	0	0	0	0	0	0	0	0	0	0	0	0	0	0	0	0	0	0	0	0	0
c281	9	6	a	8	800	1	2	2	14	0	0	2	1	137	0	1	0	1	0	0	0	3	4	0	1	0	0	2	15	0	0	1	0	0	1	0	3	5	0	3	11	0	0	0	0	0	0	0	0
c282	9	6	b	8.5	851	1	0	0	0	0	0	0	0	39	0	1	0	0	0	0	0	0	2	0	0	0	0	0	2	0	0	1	0	0	0	0	0	6	0	1	2	0	0	0	0	0	0	0	0
c283	9	6	c	9.5	1004	2	1	0	0	0	0	0	0	17	0	0	0	1	2	0	0	0	1	0	1	0	0	1	2	0	0	0	1	0	0	0	0	1	0	0	2	0	1	0	0	0	0	0	0
c284	9	6	d	9.2	724	0	0	0	1	0	0	0	0	19	0	2	0	0	0	0	0	2	2	0	0	0	1	1	2	0	0	0	1	0	0	0	0	3	0	0	6	0	0	1	0	0	0	0	0
c285	9	6	e	8	1204	2	1	0	0	5	0	0	0	23	0	1	0	0	5	0	0	1	8	0	0	0	0	1	0	3	0	4	0	0	2	0	1	15	0	2	8	0	0	0	0	1	0	0	0
c286	9	6	f	9	1300	0	1	0	1	0	0	0	0	14	0	1	0	0	1	0	0	2	1	0	0	0	0	0	0	0	0	0	0	0	0	0	0	4	0	1	1	0	0	0	0	0	0	0	0
c287	9	6	g	10	494	3	5	9	7	1	1	0	0	144	1	9	0	9	41	0	0	267	41	6	0	0	0	5	157	1	0	0	3	0	2	0	4	47	2	6	297	0	7	3	1	0	4	2	0
c288	9	6	h	10.5	1157	0	0	0	0	0	0	0	0	0	0	1	0	0	0	1	0	0	3	0	0	0	1	0	1	0	0	0	0	0	0	0	0	0	0	0	1	0	0	0	0	0	0	0	0
c289	9	7	a	4	800	0	0	0	0	0	0	1	0	6	0	0	0	0	0	0	0	0	0	0	0	0	0	0	1	0	0	0	0	0	0	0	0	0	0	0	0	0	0	0	0	0	0	0	0
c290	9	7	b	4.5	851	0	7	0	0	0	0	0	0	453	1	1	0	2	1	0	0	7	2	0	0	0	0	1	51	2	0	1	2	0	0	0	5	11	1	7	25	1	2	1	0	0	0	0	0
c291	9	7	c	5.5	1004	0	0	0	0	0	0	0	0	0	0	0	0	0	0	0	0	0	0	0	0	0	0	0	0	0	0	0	0	0	0	0	0	0	0	0	0	0	0	0	0	0	0	0	0
c292	9	7	d	5.2	724	0	0	0	0	0	0	0	0	4	0	0	0	0	0	0	0	0	0	0	0	0	0	0	0	0	0	0	0	0	0	0	0	1	0	2	1	0	0	0	0	0	0	0	0
c293	9	7	e	4	1204	0	0	0	0	0	0	0	0	12	1	0	0	0	2	0	0	0	1	0	0	0	0	0	6	0	0	0	0	0	0	0	0	1	0	0	1	0	0	0	0	0	0	0	0
c294	9	7	f	5	1300	0	0	0	2	0	0	0	0	33	0	1	0	2	1	0	1	1	0	0	0	0	0	0	3	0	0	0	0	0	1	0	0	3	0	0	2	0	0	0	0	0	0	0	0
c295	9	7	g	6	494	0	1	0	0	0	0	0	0	10	0	0	0	1	4	0	0	0	0	0	0	0	0	0	2	0	0	0	1	0	0	0	0	1	0	0	1	0	0	0	0	0	1	0	0
c296	9	7	h	6.5	1157	0	0	0	1	0	0	0	0	4	0	0	0	2	0	0	0	0	0	0	0	0	0	1	1	0	0	0	0	0	0	0	0	2	0	0	0	0	0	0	0	0	0	0	0
c297	9	8	a	4	1600	3	1	0	2	1	0	0	0	19	0	0	0	0	0	0	0	0	7	1	0	0	0	0	3	0	0	0	0	0	2	0	0	3	0	1	7	0	0	0	0	0	0	0	0
c298	9	8	b	4.5	1651	0	0	0	0	0	0	0	0	13	0	0	0	0	1	0	0	0	1	0	0	0	0	0	0	1	0	0	0	0	0	0	0	0	0	0	4	0	0	0	0	0	0	0	0
c299	9	8	c	5.5	1804	1	0	0	1	0	0	0	0	21	1	0	0	0	8	0	0	9	6	0	0	0	0	0	10	0	0	0	1	0	1	0	0	1	1	0	18	0	0	1	0	0	0	0	0
c300	9	8	d	5.2	1524	2	1	0	2	0	0	0	0	38	0	0	0	0	1	0	2	1	1	0	0	0	0	0	4	0	0	0	0	0	0	0	0	3	0	1	4	0	0	0	0	0	0	1	0
c301	9	8	e	4	2004	0	2	1	1	0	0	0	0	46	0	1	0	1	6	0	0	0	2	1	0	0	0	0	5	0	0	1	1	0	0	1	0	0	0	2	2	0	0	0	0	0	0	0	0
c302	9	8	f	5	2100	0	0	0	0	4	0	0	0	16	0	1	0	0	3	1	1	2	2	1	0	0	0	0	8	0	0	0	0	0	0	0	0	4	0	1	11	0	0	0	0	0	0	2	0
c303	9	8	g	6	1294	1	0	0	4	2	0	0	0	19	0	0	0	0	0	1	0	1	0	0	0	0	0	2	3	0	0	0	0	0	0	0	0	0	0	0	8	0	0	0	1	0	0	0	0
c304	9	8	h	6.5	1957	0	0	1	6	0	0	0	0	63	0	4	0	1	0	0	1	0	1	0	0	0	0	0	13	0	0	0	0	0	0	0	1	1	0	1	3	0	1	0	0	0	0	0	0
c305	9	9	a	8	1600	3	7	0	15	0	0	1	0	46	0	9	0	3	4	0	4	8	3	0	1	0	0	7	43	1	0	1	1	0	2	0	0	37	0	0	49	0	1	0	0	0	0	0	0
c306	9	9	b	8.5	1651	0	0	0	0	0	0	0	0	0	0	0	0	0	0	0	0	0	0	0	0	0	0	0	0	0	0	0	0	0	0	0	0	0	0	0	0	0	0	0	0	0	0	0	0
c307	9	9	c	9.5	1804	1	3	0	12	0	0	0	0	80	5	7	0	3	14	0	0	198	28	4	0	0	0	6	101	2	0	0	1	0	0	0	0	49	2	6	242	0	3	1	0	0	4	0	0
c308	9	9	d	9.2	1524	13	4	3	14	80	0	1	0	275	0	17	0	9	11	2	2	1	52	7	0	0	0	16	74	1	2	7	0	3	11	0	1	82	0	10	99	0	0	1	0	0	0	0	0
c309	9	9	e	8	2004	31	4	1	15	1	0	2	0	89	0	4	0	4	7	2	6	0	232	11	0	0	3	1	255	0	0	2	3	16	25	0	2	46	4	8	140	3	2	0	0	0	4	10	0
c310	9	9	f	9	2100	32	189	0	47	8	0	5	9	12364	25	24	1	240	30	0	11	171	322	3	26	1	10	36	1314	93	5	20	17	4	115	0	157	277	14	193	500	6	80	1	6	0	7	0	4
c311	9	9	g	10	1294	0	0	0	1	0	0	0	0	0	0	0	0	1	0	0	0	0	1	0	0	0	0	0	0	0	0	0	0	0	0	0	0	0	0	0	1	0	0	0	0	0	0	0	0
c312	9	9	h	10.5	1957	0	0	0	0	0	0	0	0	1	0	0	0	0	0	0	0	0	0	0	0	0	0	0	2	0	0	0	0	0	0	0	0	0	0	0	1	0	0	0	0	0	0	0	0
c313	9	10	a	12	1600	0	0	0	0	0	0	0	0	0	0	0	0	0	0	0	0	0	0	0	0	0	0	0	0	0	0	0	0	0	0	0	0	0	0	0	1	0	0	0	0	0	0	0	0
c314	9	10	b	12.5	1651	0	0	0	0	0	0	0	0	3	0	0	0	0	0	0	0	0	1	0	0	0	0	0	2	0	0	0	0	0	0	0	0	1	0	0	0	0	0	0	0	0	0	0	0
c315	9	10	c	13.5	1804	0	0	0	0	0	0	0	0	4	0	0	0	0	1	0	0	0	1	0	0	0	0	0	1	0	0	0	0	0	0	0	0	0	0	0	3	0	0	0	0	0	0	0	0
c316	9	10	d	13.2	1524	1	0	0	0	0	0	0	0	3	0	0	0	0	0	0	0	0	0	0	0	0	0	0	0	0	0	0	0	0	0	0	0	0	0	0	4	0	0	0	0	0	0	1	0
c317	9	10	e	12	2004	0	0	0	0	0	0	0	0	1	0	0	0	0	0	0	0	0	1	0	0	0	0	0	0	0	0	0	0	0	0	0	0	0	0	0	0	0	0	0	0	0	0	0	0
c318	9	10	f	13	2100	0	0	0	0	0	0	0	0	2	0	0	0	0	0	0	0	0	1	0	0	0	0	0	0	0	0	0	0	0	0	0	0	1	0	0	0	0	0	0	0	0	0	0	0
c319	9	10	g	14	1294	0	0	0	0	0	0	0	0	0	0	0	0	0	0	0	0	0	0	0	0	0	0	0	0	0	0	0	0	0	0	0	0	0	0	0	0	0	0	0	0	0	0	0	0
c320	9	10	h	14.5	1957	0	0	0	0	0	0	0	0	0	0	0	0	0	0	0	0	0	0	0	0	0	0	0	1	0	0	0	0	0	0	0	0	0	0	0	0	0	0	0	0	0	0	0	0
c321	6	1	a	0	0	0	0	0	0	0	0	0	0	0	0	0	0	0	0	1	0	0	1	0	0	0	0	0	0	0	0	0	0	0	0	0	0	1	0	0	0	0	0	0	0	0	0	0	0
c322	6	1	b	0.5	51	0	0	0	0	0	0	0	0	0	0	0	0	0	0	0	0	0	0	0	0	0	0	0	0	0	0	0	0	0	0	0	0	0	0	0	0	0	0	0	0	0	0	0	0
c323	6	1	c	1.5	204	0	0	0	0	0	0	0	0	0	0	0	0	0	0	0	0	0	0	0	0	0	0	0	0	0	0	0	0	0	0	0	0	0	0	0	0	0	0	0	0	0	0	0	0
c324	6	1	d	1.2	-76	0	0	0	0	0	0	0	0	0	0	0	0	0	0	0	0	0	0	0	0	0	0	0	0	0	0	0	0	0	0	0	0	0	0	0	0	0	0	0	0	0	0	0	0
c325	6	1	e	0	404	0	0	0	0	0	0	0	0	0	0	0	0	0	0	0	0	0	0	0	0	0	0	0	0	0	0	0	0	0	0	0	0	0	0	0	0	0	0	0	0	0	0	0	0
c326	6	1	f	1	500	0	0	0	0	0	0	0	0	0	0	0	0	0	0	0	0	0	0	0	0	0	0	0	0	0	0	0	0	0	0	0	0	0	0	0	1	0	0	0	0	0	0	0	0
c327	6	1	g	2	-306	0	0	0	0	0	0	0	0	0	0	0	0	0	0	0	0	0	0	0	0	0	0	0	0	0	0	0	0	0	0	0	0	0	0	0	0	0	0	0	0	0	0	0	0
c328	6	1	h	2.5	357	0	0	0	0	0	0	0	0	0	0	0	0	0	0	0	0	0	0	0	0	0	0	0	0	0	0	0	0	0	0	0	0	0	0	0	0	0	0	0	0	0	0	0	0
c329	6	2	a	4	0	0	0	0	0	0	0	0	0	0	0	0	0	0	0	0	0	0	0	0	0	0	0	0	0	0	0	0	0	0	0	0	0	0	0	0	0	0	0	0	0	0	0	0	0
c330	6	2	b	4.5	51	0	0	0	0	1	0	0	0	1	0	0	0	0	0	0	0	0	0	0	0	0	0	0	0	0	0	0	0	0	0	0	0	0	0	0	0	0	0	0	0	0	0	0	0
c331	6	2	c	5.5	204	0	0	0	0	0	0	0	0	3	0	0	0	0	0	0	0	0	1	0	0	0	0	0	0	0	0	0	0	0	0	0	0	0	0	0	1	0	0	0	0	0	0	0	0
c332	6	2	d	5.2	-76	0	0	0	1	0	0	0	0	1	0	0	0	0	0	0	0	0	1	0	0	0	0	0	1	0	0	0	0	0	2	0	0	0	0	0	1	0	0	0	0	0	0	0	0
c333	6	2	e	4	404	0	0	0	0	0	0	0	0	0	0	0	0	0	0	0	0	0	0	0	0	0	0	0	0	0	0	0	0	0	0	0	0	0	0	0	0	0	0	0	0	0	0	0	0
c334	6	2	f	5	500	7	6	0	0	0	1	2	0	650	0	2	0	3	2	0	3	0	3	0	2	0	2	3	9	0	0	19	3	0	3	0	902	106	0	10	14	0	0	0	4	1	0	0	1
c335	6	2	g	6	-306	8	7	0	1	0	1	7	0	452	0	0	0	2	0	2	0	2	4	0	1	3	1	4	11	0	0	12	0	0	1	0	1204	120	1	5	10	0	0	0	3	0	0	0	1
c336	6	2	h	6.5	357	8	1	1	7	0	0	2	0	7840	2	0	0	5	0	0	0	0	3	0	0	3	2	46	121	5	5	5	1	5	5	0	41	1062	0	28	16	0	0	0	3	12	1	0	0
c337	6	3	a	8	0	34	19	0	5	3	0	22	0	976	2	0	1	5	1	0	6	0	14	1	2	9	2	8	46	0	5	47	3	0	2	0	4243	305	4	12	48	0	2	0	24	0	0	3	0
c338	6	3	b	8.5	51	36	16	1	61	1	0	2	0	20180	4	9	0	13	1	5	3	3	34	0	0	3	75	7	68	0	2	10	1	0	6	0	197	122	3	322	125	0	0	1	17	5	1	2	1
c339	6	3	c	9.5	204	38	34	3	11	1	1	1	1	30796	5	5	0	43	6	2	2	18	73	0	40	1	2	8	235	7	1	13	10	0	19	0	58	71	13	66	210	1	4	2	18	2	1	0	2
c340	6	3	d	9.2	-76	89	10	1	1	0	1	71	0	132873	30	0	72	42	16	8	3	7	25	0	9	3	0	5	340	13	0	12	0	2	1	0	32	69	2	1821	1342	2	1	2	60	20	20	1	0
c341	6	3	e	8	404	63	11	30	71	30	446	13	0	2411	0	2	1	32	0	0	3	1	34	2	17	21	0	129	25	0	5	138	56	1	3	1	133	117	3	27	350	0	2	0	4	2	0	11	1
c342	6	3	f	9	500	3	2	0	2	1	0	1	0	254	0	1	0	1	0	0	0	0	3	0	0	0	0	0	4	0	0	1	0	0	2	0	45	10	0	2	3	0	0	0	0	1	0	0	0
c343	6	3	g	10	-306	2	1	1	0	0	1	0	0	511	0	0	0	1	0	0	0	0	2	0	0	0	1	0	2	0	0	6	1	0	1	0	63	30	0	1	8	0	0	0	0	0	0	0	0
c344	6	3	h	10.5	357	0	0	0	1	0	0	1	0	295	0	0	0	1	0	1	0	0	0	0	0	0	1	0	3	2	0	2	1	0	1	0	54	6	0	4	6	0	0	0	1	0	0	0	0
c345	6	4	a	12	0	1	2	0	1	0	0	0	0	244	0	0	1	1	0	0	0	0	2	0	0	0	1	2	4	0	0	0	0	0	1	0	39	14	0	1	9	0	0	0	0	0	0	0	1
c346	6	4	b	12.5	51	0	2	0	0	0	1	1	0	189	0	0	0	0	0	0	0	0	0	0	0	0	0	0	1	0	0	5	1	0	0	0	46	7	0	4	5	0	0	0	1	0	0	0	1
c347	6	4	c	13.5	204	1	2	0	0	0	1	0	0	407	1	1	0	1	0	0	0	0	0	0	1	0	0	1	4	0	0	3	1	0	3	0	61	12	0	3	5	0	1	0	0	1	0	0	1
c348	6	4	d	13.2	-76	3	1	0	1	0	0	0	0	283	0	0	0	2	0	0	0	0	6	0	0	1	0	0	38	0	0	3	1	0	2	0	44	85	1	1	13	0	0	0	0	1	1	0	0
c349	6	4	e	12	404	2	3	0	0	0	1	4	0	446	1	0	0	0	2	0	8	0	3	0	0	0	0	1	2	0	0	7	0	0	1	0	47	19	0	2	9	0	0	0	2	19	0	0	0
c350	6	4	f	13	500	2	6	0	1	0	0	1	0	652	0	0	0	1	0	0	4	0	5	0	0	1	0	2	10	0	0	7	0	1	5	0	160	50	0	8	6	1	1	1	0	44	0	0	0
c351	6	4	g	14	-306	12	5	0	4	7	1	0	0	1520	0	1	0	7	6	1	0	2	3	0	20	0	0	0	11	0	0	10	0	0	4	0	93	28	12	11	67	0	0	0	1	1	1	0	0
c352	6	4	h	14.5	357	7	3	0	0	0	1	1	0	3793	0	1	0	3	1	0	3	0	1	0	1	1	1	1	17	0	0	8	1	0	294	0	107	30	1	7	26	0	0	0	3	0	0	0	0
c353	6	5	a	9	800	0	0	0	0	0	0	0	0	0	0	0	0	0	0	0	0	0	0	0	0	0	0	0	0	0	0	0	0	0	0	0	0	0	0	0	0	0	0	0	0	0	0	0	0
c354	6	5	b	12.5	851	0	0	0	0	0	0	0	0	0	0	0	0	0	0	0	0	0	0	0	0	0	0	0	0	0	0	0	0	0	0	0	0	0	0	0	0	0	0	0	0	0	0	0	0
c355	6	5	c	13.5	1004	0	0	0	0	0	0	0	0	0	0	0	0	0	0	0	0	0	0	0	0	0	0	0	0	0	0	0	0	0	0	0	0	0	0	0	0	0	0	0	0	0	0	0	0
c356	6	5	d	13.2	724	5	1	0	2	0	0	11	1	1141	0	0	0	2	0	5	11	0	8	0	3	0	2	1	22	0	1	3	0	0	1	1	106	34	0	15	5	0	0	1	1	190	0	0	3
c357	6	5	e	12	1204	0	0	0	0	0	0	0	0	0	0	0	0	0	0	0	0	0	0	0	0	0	0	0	0	0	0	0	0	0	0	0	0	0	0	0	0	0	0	0	0	0	0	0	0
c358	6	5	f	13	1300	0	0	0	0	0	0	0	0	0	0	0	0	0	0	0	0	0	0	0	0	0	0	0	0	0	0	0	0	0	0	0	0	0	0	0	0	0	0	0	0	0	0	0	0
c359	6	5	g	14	494	0	0	0	0	0	0	0	0	0	0	0	0	0	0	0	0	0	0	0	0	0	0	0	1	0	0	0	0	0	0	0	0	0	0	0	0	0	0	0	0	0	0	0	0
c360	6	5	h	14.5	1157	0	0	0	0	0	0	0	0	0	0	0	0	0	0	0	0	0	0	0	0	0	0	0	0	0	0	0	0	0	0	0	0	0	0	0	0	0	0	0	0	0	0	0	0
c361	6	6	a	8	800	0	0	0	0	0	0	0	0	0	0	0	0	0	0	0	0	0	0	0	0	0	0	0	0	0	0	0	0	0	0	0	0	0	0	0	0	0	0	0	0	0	0	0	0
c362	6	6	b	8.5	851	0	0	0	0	0	0	0	0	0	0	0	0	0	0	0	0	0	0	0	0	0	0	0	0	0	0	0	0	0	0	0	0	0	0	0	0	0	0	0	0	0	0	0	0
c363	6	6	c	9.5	1004	0	0	0	0	0	0	0	0	0	0	0	0	0	0	0	0	0	0	0	0	0	0	0	0	0	0	0	0	0	0	0	0	0	0	0	0	0	0	0	0	0	0	0	0
c364	6	6	d	9.2	724	2	2	0	8	1	0	2	0	212	0	6	0	0	2	0	1	7	7	1	0	0	0	3	22	0	0	0	1	0	0	0	6	28	4	1	44	0	1	2	0	0	1	0	0
c365	6	6	e	8	1204	0	1	0	2	1	0	0	0	115	0	0	0	0	3	0	0	5	3	0	0	0	0	0	7	1	0	1	1	0	1	0	7	21	0	0	5	0	1	0	0	0	0	0	0
c366	6	6	f	9	1300	0	0	0	0	1	0	0	0	53	0	2	0	0	1	0	0	1	1	1	0	0	0	0	0	0	0	0	0	0	0	0	1	13	0	0	4	1	0	1	0	0	0	0	0
c367	6	6	g	10	494	3	0	0	0	0	0	0	0	58	0	0	0	1	1	0	0	4	4	0	0	0	1	0	2	1	0	0	0	1	0	0	1	16	0	0	7	0	0	0	0	0	0	0	0
c368	6	6	h	10.5	1157	1	0	1	2	1	0	1	0	164	0	1	1	1	2	1	0	6	2	1	0	0	1	0	5	0	0	0	0	0	0	1	3	18	0	0	9	0	0	0	0	0	0	0	0
c369	6	7	a	4	800	1	0	0	7	0	0	0	0	163	0	0	0	2	2	0	0	2	43	2	0	0	0	3	7	0	1	0	1	3	3	0	5	24	3	1	44	0	0	0	0	0	1	0	0
c370	6	7	b	4.5	851	1	1	2	8	5	0	9	0	656	0	0	0	2	36	2	0	5	5	0	0	0	1	2	11	2	0	1	0	0	0	1	5	15	0	1	11	2	0	0	0	0	0	0	0
c371	6	7	c	5.5	1004	2	2	0	4	8	0	11	0	1009	1	0	1	0	85	2	1	1	6	0	0	0	0	1	15	2	0	1	0	1	0	2	2	16	3	0	22	0	0	0	1	0	0	0	0
c372	6	7	d	5.2	724	6	0	0	40	9	0	3	1	505	0	1	2	1	1	0	3	3	7	0	0	0	0	2	24	0	0	2	1	2	1	1	4	23	2	4	48	0	2	0	0	0	1	2	0
c373	6	7	e	4	1204	1	0	5	114	8	0	0	0	164	0	4	0	6	6	1	4	2	37	0	2	1	2	8	54	0	0	5	3	0	3	1	13	66	2	44	130	1	0	0	8	0	1	1	0
c374	6	7	f	5	1300	35	6	1	19	2	0	0	0	348	0	4	0	3	16	4	8	4	295	0	1	3	14	3	71	1	0	5	5	29	39	0	4	48	8	2	245	5	0	2	1	1	12	2	0
c375	6	7	g	6	494	36	50	0	110	1	0	3	7	437	0	73	0	37	20	0	16	40	37	0	0	5	1	48	432	0	3	8	7	0	12	0	5	180	63	2	418	0	0	3	1	0	2	0	0
c376	6	7	h	6.5	1157	0	2	0	3	0	0	1	0	141	0	0	0	1	0	0	1	3	2	0	0	0	0	0	8	0	0	0	1	0	0	0	4	15	1	1	11	0	0	0	0	0	0	0	0
c377	6	8	a	4	1600	1	2	0	0	7	0	3	0	406	0	0	1	1	31	1	0	4	2	0	0	0	0	1	17	1	0	0	1	0	0	2	9	20	0	2	11	0	0	0	0	1	1	0	0
c378	6	8	b	4.5	1651	2	0	0	86	17	0	1	0	603	0	5	2	1	4	0	3	5	13	0	1	0	0	4	19	0	0	1	0	0	1	0	4	44	2	8	57	2	0	0	0	1	1	0	0
c379	6	8	c	5.5	1804	6	2	4	93	4	0	0	1	173	0	3	0	3	6	0	2	5	28	0	0	0	0	11	18	0	1	5	0	0	5	0	5	53	5	24	86	1	0	0	2	0	0	1	1
c380	6	8	d	5.2	1524	1	2	0	1	0	0	0	0	83	0	0	0	0	0	0	0	0	3	0	0	0	0	0	11	1	0	2	0	1	0	0	0	10	2	2	7	0	0	0	0	0	0	0	0
c381	6	8	e	4	2004	1	1	2	41	4	0	1	0	307	0	0	0	3	4	0	2	4	7	0	0	0	0	0	14	1	0	0	0	0	1	0	12	17	0	3	38	0	0	0	0	1	1	0	0
c382	6	8	f	5	2100	7	6	5	205	2	0	1	1	230	0	0	0	14	3	0	3	7	41	0	4	2	0	8	43	0	2	7	3	0	1	0	19	65	5	59	150	0	0	2	1	0	0	0	0
c383	6	8	g	6	1294	56	13	2	19	1	1	0	1	568	1	6	0	10	10	3	19	9	694	0	1	0	7	2	139	0	1	1	5	52	47	0	13	88	13	3	522	7	2	3	3	0	7	10	0
c384	6	8	h	6.5	1957	0	0	0	0	0	0	0	0	0	0	0	0	0	0	0	0	0	0	0	0	0	0	0	0	0	0	0	0	0	0	0	0	0	0	0	0	0	0	0	0	0	0	0	0
c385	6	9	a	8	1600	1	1	0	2	0	0	0	0	92	0	1	0	0	0	0	0	3	4	0	0	0	0	0	7	0	0	1	2	0	0	0	2	12	0	0	10	0	0	0	1	0	0	1	0
c386	6	9	b	8.5	1651	0	0	2	8	0	0	0	0	103	0	0	0	1	9	0	0	10	7	0	0	0	0	0	18	0	0	0	0	0	0	0	2	20	1	1	24	0	2	0	0	0	0	0	0
c387	6	9	c	9.5	1804	0	0	0	0	0	0	0	0	0	0	0	0	0	0	0	0	0	0	0	0	0	0	0	0	0	0	0	0	0	0	0	0	0	0	0	0	0	0	0	0	0	0	0	0
c388	6	9	d	9.2	1524	1	0	0	6	0	0	0	0	12	0	0	0	2	0	0	1	0	1	0	0	0	0	1	0	0	0	0	0	1	0	0	0	6	0	1	4	0	0	0	0	0	0	0	0
c389	6	9	e	8	2004	0	0	0	0	0	0	0	0	0	0	0	0	0	0	0	0	0	0	0	0	0	0	0	0	0	0	0	0	0	0	0	0	0	0	0	0	0	0	0	0	0	0	0	0
c390	6	9	f	9	2100	0	0	0	1	0	0	0	0	65	0	2	0	1	1	0	0	4	3	0	0	0	0	0	9	0	0	1	0	0	0	0	4	8	1	0	4	0	0	0	0	0	0	0	0
c391	6	9	g	10	1294	0	0	0	5	3	0	0	0	122	0	1	0	0	0	0	0	0	3	0	0	0	0	0	9	0	0	1	0	0	1	0	4	12	0	3	9	1	0	0	1	1	0	0	0
c392	6	9	h	10.5	1957	1	1	0	1	1	0	0	0	191	1	0	0	0	9	0	0	4	3	0	0	0	0	0	5	0	0	1	0	1	1	0	4	5	1	1	5	0	0	0	0	0	0	0	0
c393	6	10	a	12	1600	1	4	0	1	1	0	0	0	188	0	0	0	1	2	0	0	3	5	0	0	0	1	0	10	0	0	1	0	0	0	0	4	18	2	2	13	0	5	0	0	0	0	0	0
c394	6	10	b	12.5	1651	1	0	0	6	0	0	0	0	48	0	0	0	1	0	0	0	3	5	0	0	0	0	1	11	0	0	1	1	0	0	0	1	9	0	1	3	1	0	0	0	0	1	0	0
c395	6	10	c	13.5	1804	4	1	1	1	0	0	1	0	144	0	0	0	1	0	1	1	3	8	0	0	0	1	0	6	1	0	0	0	1	3	0	4	24	1	0	16	0	0	0	0	0	0	1	0
c396	6	10	d	13.2	1524	5	4	0	13	9	1	0	0	174	0	1	0	2	12	1	0	7	15	4	0	0	1	4	29	1	5	3	1	0	5	0	4	24	4	1	42	1	0	0	0	2	0	0	0
c397	6	10	e	12	2004	4	3	4	19	0	0	0	0	117	0	3	0	1	17	0	0	63	24	0	0	0	0	2	37	3	0	0	2	0	1	0	2	12	3	3	109	0	5	0	0	1	2	0	0
c398	6	10	f	13	2100	0	1	0	3	2	0	8	0	571	0	2	0	1	42	3	0	3	9	0	0	0	0	4	17	0	0	0	1	1	0	1	5	22	1	1	17	0	0	0	0	0	1	0	0
c399	6	10	g	14	1294	20	5	1	18	15	0	0	0	538	0	7	0	4	19	3	1	7	42	0	2	0	2	8	97	3	3	5	1	1	5	1	2	60	7	3	128	0	0	2	1	3	0	0	0
c400	6	10	h	14.5	1957	0	0	0	0	0	0	0	0	2	0	0	0	0	0	0	0	0	0	0	0	0	0	0	0	0	0	0	0	0	0	0	0	0	0	0	0	0	0	0	0	0	0	0	0
c401	5	1	a	0	0	6	11	0	23	1	0	0	1	136	1	15	0	17	8	0	4	16	6	0	0	1	0	16	112	1	0	2	4	1	1	0	2	63	24	2	90	0	1	2	1	0	0	0	0
c402	5	1	b	0.5	51	12	53	10	98	1	1	5	1	618	0	17	0	28	82	0	5	1046	152	2	1	3	2	28	727	12	3	3	9	2	11	0	7	158	44	21	1244	0	33	11	2	1	25	6	0
c403	5	1	c	1.5	204	82	42	13	87	135	3	3	4	1630	6	50	0	89	40	11	16	28	270	14	11	5	4	61	503	9	20	28	9	3	52	0	5	564	65	15	557	0	0	4	2	3	6	2	0
c404	5	1	d	1.2	-76	3	1	0	21	0	0	0	0	89	0	0	0	0	4	0	0	1	7	0	1	0	0	3	6	0	1	1	0	0	1	1	6	14	2	4	27	0	0	0	0	0	0	0	0
c405	5	1	e	0	404	4	1	0	124	9	0	1	3	559	0	5	2	3	2	0	5	3	8	0	0	0	1	3	36	0	1	0	2	0	4	1	4	31	2	6	51	0	1	0	0	0	1	1	0
c406	5	1	f	1	500	52	9	0	17	0	0	1	0	338	0	9	0	12	8	0	5	3	241	0	1	0	7	4	70	0	0	3	4	24	38	0	7	65	3	3	192	8	1	2	1	0	11	0	0
c407	5	1	g	2	-306	22	178	0	30	2	0	3	2	10015	12	13	0	119	10	0	8	120	196	1	11	0	5	7	778	54	7	15	6	3	26	0	54	140	36	48	258	0	81	2	7	0	4	0	0
c408	5	1	h	2.5	357	1	2	0	1	0	0	0	1	1014	0	0	0	0	1	0	0	0	1	0	0	0	0	1	13	0	0	0	0	0	0	0	4	10	1	7	19	0	0	0	0	0	0	0	0
c409	5	2	a	4	0	1	1	0	3	0	0	0	0	143	0	0	0	3	2	0	0	4	10	0	0	0	0	0	12	0	0	3	0	1	0	0	6	19	0	1	12	0	0	0	0	0	0	0	0
c410	5	2	b	4.5	51	1	1	0	4	3	0	0	0	182	0	0	0	1	3	0	0	2	7	1	1	0	0	0	7	1	0	5	1	0	0	1	2	12	1	1	12	0	0	0	1	1	0	0	0
c411	5	2	c	5.5	204	4	1	0	6	0	0	0	0	160	0	0	0	2	4	1	0	2	4	0	0	0	0	3	4	0	0	5	0	1	0	0	3	8	1	0	11	0	0	0	1	0	0	0	0
c412	5	2	d	5.2	-76	2	1	0	5	2	0	1	0	236	0	1	0	2	7	0	0	1	5	0	1	0	1	3	20	1	0	10	0	1	0	0	3	32	0	3	13	0	0	0	0	0	0	1	0
c413	5	2	e	4	404	0	2	0	9	0	0	2	0	186	0	2	0	1	1	0	0	3	11	1	0	0	1	1	17	0	0	0	0	0	1	0	54	31	1	0	15	0	0	0	0	0	1	0	0
c414	5	2	f	5	500	3	0	0	4	1	0	5	0	323	0	1	0	2	1	1	0	4	6	1	0	0	0	2	19	0	0	2	1	0	0	2	582	74	4	2	17	0	0	1	2	0	1	0	0
c415	5	2	g	6	-306	9	4	1	10	2	0	3	0	401	0	2	0	2	4	0	1	5	16	0	1	4	0	2	23	0	0	6	1	0	0	0	551	98	1	1	24	0	2	0	5	0	1	0	0
c416	5	2	h	6.5	357	15	5	0	11	1	0	16	1	818	0	5	0	5	7	1	4	7	24	2	1	4	3	17	49	0	4	34	1	0	7	3	2152	254	2	7	54	0	2	0	4	0	0	0	2
c417	5	3	a	8	0	0	0	0	0	0	0	0	0	43	0	0	0	0	0	0	0	0	1	0	0	0	0	0	1	0	0	1	0	0	0	0	0	4	0	0	0	0	0	0	0	0	0	0	0
c418	5	3	b	8.5	51	0	0	0	0	0	0	0	0	10	0	0	0	0	0	0	0	0	1	0	0	0	0	0	0	0	0	0	0	0	0	0	0	1	0	0	0	0	0	0	0	0	0	0	0
c419	5	3	c	9.5	204	0	0	0	0	0	0	0	0	1	0	0	0	0	0	0	0	0	0	0	0	0	0	0	0	0	0	0	0	0	0	0	0	0	0	0	0	0	0	0	0	0	0	0	0
c420	5	3	d	9.2	-76	0	0	0	0	0	0	1	0	3	0	0	0	0	0	0	0	0	1	0	0	0	0	0	2	0	0	0	0	0	0	0	0	0	0	0	2	0	0	0	0	0	0	0	0
c421	5	3	e	8	404	13	3	0	25	5	0	4	0	20693	4	3	2	6	9	1	2	6	37	2	1	3	12	114	512	4	25	2	1	20	11	0	15	2052	1	81	60	1	0	0	11	21	1	0	0
c422	5	3	f	9	500	0	0	1	2	0	0	0	0	0	0	0	0	0	0	0	0	0	0	0	0	0	1	0	0	0	0	0	0	0	0	0	0	0	0	0	1	0	0	0	0	0	0	0	0
c423	5	3	g	10	-306	0	0	0	1	0	0	0	0	2	0	0	0	0	0	1	0	0	0	0	0	0	0	0	1	0	0	0	0	0	0	0	0	0	0	0	0	0	0	0	0	0	0	0	0
c424	5	3	h	10.5	357	0	0	0	1	0	0	0	0	2	0	0	0	0	0	0	0	0	0	0	0	0	0	0	0	0	0	0	0	0	0	0	0	0	0	0	0	0	0	0	0	0	0	0	0
c425	5	4	a	12	0	0	0	0	0	0	0	0	0	4	0	0	0	0	1	0	0	0	0	0	0	0	0	0	0	0	0	0	0	0	0	0	0	1	0	0	0	0	0	0	0	0	0	0	0
c426	5	4	b	12.5	51	0	0	0	0	0	0	0	0	0	0	0	0	0	0	0	0	0	0	0	0	0	0	0	0	0	0	0	0	0	0	0	0	0	0	0	0	0	0	0	0	0	0	0	0
c427	5	4	c	13.5	204	0	0	0	0	0	0	0	0	1	0	0	0	0	0	0	0	0	0	0	0	0	0	0	0	0	0	0	0	0	0	0	0	0	0	0	0	0	0	0	0	0	0	0	0
c428	5	4	d	13.2	-76	0	0	0	0	0	0	0	0	3	0	0	0	0	0	0	0	0	0	0	0	0	0	0	0	0	0	0	0	0	0	0	0	0	0	0	0	0	0	0	0	0	0	0	0
c429	5	4	e	12	404	0	0	0	0	0	0	0	0	6	0	0	0	0	0	0	0	0	0	0	0	0	0	0	0	0	0	0	0	0	0	0	0	1	0	0	0	0	0	0	0	0	0	0	0
c430	5	4	f	13	500	0	1	0	0	0	0	0	0	32	0	0	0	0	0	0	0	0	0	0	0	0	0	0	1	0	0	0	0	0	0	0	0	6	0	0	0	0	0	0	0	0	0	0	0
c431	5	4	g	14	-306	0	0	0	0	0	0	0	0	4	0	0	0	0	0	0	0	0	0	0	0	0	0	0	0	1	0	0	0	0	0	0	0	0	0	0	0	0	0	0	0	0	0	0	0
c432	5	4	h	14.5	357	0	0	0	0	0	0	0	0	1	0	0	0	0	0	0	0	0	0	0	0	0	0	0	2	0	0	0	0	0	1	0	0	2	0	0	1	0	0	0	0	0	0	0	0
c433	5	5	a	9	800	0	0	0	0	0	0	0	0	1	0	0	0	0	0	0	0	0	0	0	0	0	0	0	0	0	0	0	0	0	0	0	0	2	0	0	0	0	0	0	0	0	0	0	0
c434	5	5	b	12.5	851	0	0	0	2	0	0	0	0	7	0	0	0	0	0	0	0	0	1	0	0	0	0	0	0	0	0	0	0	0	0	0	0	1	0	0	0	0	0	0	0	0	0	0	0
c435	5	5	c	13.5	1004	0	0	0	0	0	0	0	0	10	0	0	0	0	0	0	1	0	0	0	0	0	0	0	0	0	0	2	0	0	0	0	19	1	0	0	0	0	0	0	0	0	0	0	0
c436	5	5	d	13.2	724	0	0	0	0	0	0	0	0	6	0	0	0	0	0	0	0	0	0	0	0	0	0	0	0	0	0	0	0	0	0	0	16	5	0	0	0	0	0	0	0	0	0	0	0
c437	5	5	e	12	1204	0	0	0	0	0	0	0	0	5	0	0	0	0	0	0	0	0	0	0	0	0	0	0	0	0	0	0	0	0	0	0	1	0	0	0	0	0	0	0	0	0	0	0	0
c438	5	5	f	13	1300	0	0	0	0	0	0	0	0	0	0	0	0	0	0	0	0	0	0	0	0	0	0	0	0	0	0	0	0	0	0	0	1	0	0	0	0	0	0	0	0	0	0	0	0
c439	5	5	g	14	494	0	0	0	0	0	0	0	0	1	0	0	0	0	0	0	0	0	0	0	0	0	0	0	0	0	0	0	0	0	0	0	0	0	0	0	0	0	0	0	0	0	0	0	0
c440	5	5	h	14.5	1157	1	0	0	0	0	0	0	0	13	0	0	0	0	0	0	0	0	0	0	0	0	0	0	0	0	0	1	0	0	2	0	42	5	0	0	1	0	0	0	0	0	0	0	0
c441	5	6	a	8	800	0	1	0	0	0	0	0	0	5	0	0	0	0	0	0	0	0	0	0	0	1	0	0	2	0	0	0	0	0	0	0	46	3	1	0	0	0	0	0	1	0	0	0	0
c442	5	6	b	8.5	851	0	0	0	0	0	0	0	0	2	0	0	0	0	0	0	0	0	0	0	0	0	0	0	0	0	0	0	0	0	0	0	0	0	0	0	0	0	0	0	0	0	0	0	0
c443	5	6	c	9.5	1004	0	0	0	0	0	0	0	0	1	0	0	0	0	0	0	0	0	0	0	0	0	0	0	0	0	0	0	0	0	0	0	5	0	0	0	0	0	0	0	0	0	0	0	0
c444	5	6	d	9.2	724	3	0	0	0	0	0	0	0	29	0	0	0	0	0	0	0	0	0	0	0	0	0	0	1	0	0	2	0	0	0	1	60	5	0	0	1	0	0	0	0	0	0	0	0
c445	5	6	e	8	1204	0	0	0	0	0	0	0	0	0	0	0	0	0	0	0	0	0	0	0	0	0	0	0	0	0	0	0	0	0	0	0	0	0	0	0	0	0	0	0	0	0	0	0	0
c446	5	6	f	9	1300	0	0	0	0	0	0	0	0	1	0	0	0	0	0	0	0	0	0	0	0	0	0	0	0	0	0	0	0	0	0	0	4	0	0	0	0	0	0	0	0	0	0	0	0
c447	5	6	g	10	494	0	0	0	0	0	0	0	0	6	0	0	0	0	0	0	0	0	0	0	0	0	0	0	0	0	0	0	0	0	0	0	13	3	0	0	0	0	0	0	0	0	0	0	0
c448	5	6	h	10.5	1157	0	0	0	0	0	0	0	0	3	0	0	0	0	0	0	0	0	0	0	0	0	0	0	0	0	0	0	0	0	0	0	22	1	0	0	0	0	0	0	0	0	0	0	0
c449	5	7	a	4	800	0	0	0	0	0	0	0	0	0	0	0	0	0	0	0	0	0	0	0	0	0	0	0	0	0	0	0	0	0	0	0	0	0	0	0	0	0	0	0	0	0	0	0	0
c450	5	7	b	4.5	851	0	0	0	0	0	0	0	0	0	0	0	0	0	0	0	0	0	0	0	0	0	0	0	0	0	0	0	0	0	0	0	0	0	0	0	0	0	0	0	0	0	0	0	0
c451	5	7	c	5.5	1004	0	0	0	0	0	0	1	0	5	0	0	0	1	0	0	0	0	0	0	0	0	0	0	1	0	0	3	0	0	0	0	18	3	0	0	0	0	0	0	1	0	0	0	0
c452	5	7	d	5.2	724	0	0	0	0	0	0	0	0	1	0	0	0	0	0	0	0	0	0	0	0	0	0	0	0	0	0	0	0	0	0	0	0	0	0	0	0	0	0	0	0	0	0	0	0
c453	5	7	e	4	1204	0	0	0	0	0	0	0	0	0	0	0	0	0	0	0	0	0	0	0	0	0	0	0	0	0	0	0	0	0	0	0	0	0	0	0	0	0	0	0	0	0	0	0	0
c454	5	7	f	5	1300	0	0	0	0	0	0	0	0	0	0	0	0	0	0	0	0	0	0	0	0	0	0	0	0	0	0	0	0	0	0	0	1	1	0	0	0	0	0	0	0	0	0	0	0
c455	5	7	g	6	494	0	0	0	0	0	0	0	0	7	0	0	0	0	0	0	0	0	0	0	0	0	0	0	0	0	0	0	0	0	1	1	20	2	0	0	2	0	0	0	0	0	0	0	0
c456	5	7	h	6.5	1157	0	0	0	0	0	0	0	0	0	0	0	0	0	0	0	0	0	0	0	0	0	0	0	0	0	0	0	0	0	0	0	0	0	0	0	0	0	0	0	0	0	0	0	0
c457	5	8	a	4	1600	0	0	0	0	0	0	0	0	0	0	0	0	0	0	0	0	0	0	0	0	0	0	0	0	0	0	0	0	0	0	0	0	0	0	0	0	0	0	0	0	0	0	0	0
c458	5	8	b	4.5	1651	0	0	0	0	0	0	0	0	0	0	0	0	0	0	0	0	0	0	0	0	0	0	0	0	0	0	0	0	0	0	0	2	0	0	0	0	0	0	0	0	0	0	0	0
c459	5	8	c	5.5	1804	0	0	0	0	0	0	0	0	64	0	0	0	0	1	0	0	0	0	0	0	0	0	0	0	0	0	0	0	0	0	0	0	1	0	0	0	0	0	0	0	0	0	0	0
c460	5	8	d	5.2	1524	0	0	0	0	1	0	0	0	89	0	0	0	0	0	0	0	0	0	0	0	0	0	0	2	0	0	0	0	0	0	0	0	0	0	0	0	0	0	0	0	0	0	0	0
c461	5	8	e	4	2004	1	1	0	0	0	0	0	0	670	0	0	1	1	0	0	0	1	1	0	1	0	0	0	5	0	0	0	0	0	1	0	35	14	1	8	17	0	0	0	0	0	0	0	0
c462	5	8	f	5	2100	2	1	1	1	1	0	0	0	272	0	0	0	0	0	0	0	1	1	0	2	0	1	0	1	0	0	4	1	0	0	0	35	13	0	3	3	0	0	0	0	1	0	0	0
c463	5	8	g	6	1294	0	1	0	0	0	0	0	0	166	0	1	0	0	0	0	0	1	0	0	0	1	0	0	5	0	0	4	1	0	0	0	20	9	0	2	3	0	0	0	0	0	0	0	0
c464	5	8	h	6.5	1957	2	1	1	2	1	1	2	0	503	0	0	0	2	0	0	0	1	2	0	2	0	1	1	7	1	0	9	1	0	2	0	53	27	0	5	9	0	0	0	1	2	0	0	1
c465	5	9	a	8	1600	4	3	0	1	1	0	1	1	479	0	1	0	1	3	0	0	0	3	0	0	0	0	0	9	0	0	11	0	1	2	1	55	18	0	2	7	0	0	0	1	0	0	0	3
c466	5	9	b	8.5	1651	8	2	0	1	1	0	1	1	649	0	0	0	5	3	0	1	0	2	0	0	1	1	1	17	0	0	22	2	0	4	1	103	26	1	3	15	0	0	0	0	0	0	0	0
c467	5	9	c	9.5	1804	0	0	0	0	0	0	0	0	2	0	0	0	0	0	0	0	0	0	0	0	0	0	0	0	0	0	0	1	0	0	0	1	0	0	0	1	0	0	0	0	0	0	0	0
c468	5	9	d	9.2	1524	4	7	0	3	0	2	6	0	7013	1	1	0	3	0	0	1	0	4	0	1	2	0	2	33	0	0	14	0	0	2	0	148	43	0	96	162	0	1	0	1	4	0	0	1
c469	5	9	e	8	2004	442	148	8	9	42	2	122	30	6319	16	23	1	44	11	13	37	8	160	1	19	93	20	84	252	16	22	496	3	1	25	18	34075	3516	12	95	313	2	10	0	136	15	2	4	5
c470	5	9	f	9	2100	4	6	0	0	0	1	0	0	421	0	0	0	0	1	0	1	0	2	0	1	0	1	3	8	0	0	4	1	0	1	0	161	26	0	8	8	0	1	0	1	1	0	0	0
c471	5	9	g	10	1294	1	4	0	0	0	1	1	1	479	1	0	0	0	0	0	0	0	2	0	1	1	1	1	9	0	0	6	0	0	2	0	151	38	0	6	11	0	0	0	0	0	0	0	0
c472	5	9	h	10.5	1957	21	5	0	4	2	1	4	1	1105	1	2	0	7	4	0	0	1	11	0	4	0	8	3	32	0	0	59	1	0	4	1	48	36	0	7	30	0	0	0	2	2	1	1	5
c473	5	10	a	12	1600	44	29	1	3	1	0	25	0	1339	0	5	0	8	0	1	7	1	29	0	5	10	1	16	60	3	3	46	1	0	8	0	3216	328	4	17	97	1	4	1	6	2	1	0	2
c474	5	10	b	12.5	1651	64	31	1	5	5	0	40	3	1376	3	3	0	4	7	0	9	3	18	1	4	9	0	18	55	2	5	79	2	0	7	5	5965	418	2	28	63	0	3	0	24	1	0	1	2
c475	5	10	c	13.5	1804	135	59	1	3	14	0	40	4	2051	4	7	0	8	6	5	19	2	44	1	9	21	1	28	93	3	6	132	4	0	19	3	9526	717	4	31	85	0	2	1	63	5	0	0	2
c476	5	10	d	13.2	1524	152	37	11	20	18	1	24	18	5810	6	11	0	74	38	0	3	7	72	0	39	7	33	8	283	1	2	366	7	0	73	6	237	157	3	57	253	0	0	0	18	4	4	0	24
c477	5	10	e	12	2004	5	3	0	0	1	1	0	0	1054	0	0	0	1	0	0	0	0	2	0	0	0	0	3	16	1	0	4	0	0	1	0	72	123	0	9	7	0	0	0	0	2	0	0	0
c478	5	10	f	13	2100	1	0	0	0	0	0	1	2	2158	0	0	0	0	2	0	0	0	1	0	1	0	0	0	7	0	0	4	0	0	1	0	65	15	0	38	29	0	0	0	2	0	0	0	0
c479	5	10	g	14	1294	6	0	1	0	1	0	1	0	300	1	0	0	0	3	0	0	0	2	0	0	0	3	0	5	0	1	15	0	0	0	0	40	12	0	5	10	0	0	0	0	0	0	0	0
c480	5	10	h	14.5	1957	8	6	0	0	0	0	2	0	396	1	0	0	0	1	0	3	0	2	0	0	0	1	0	4	0	1	5	1	0	0	0	396	43	0	4	11	0	0	0	1	0	0	0	0
c481	3	1	a	0	0	0	0	0	0	0	0	0	0	1	0	0	0	0	0	0	0	0	0	0	0	0	0	0	0	0	0	0	0	0	0	0	0	0	0	0	0	0	0	0	0	0	0	0	0
c482	3	1	b	0.5	51	0	0	0	0	0	0	0	0	0	0	0	0	0	0	0	0	0	0	0	0	0	0	0	1	0	0	0	0	0	0	0	0	0	0	0	0	0	0	0	0	0	0	0	0
c483	3	1	c	1.5	204	0	0	0	0	0	0	0	0	0	0	0	0	0	0	0	0	0	0	0	0	0	0	0	0	0	0	0	0	0	0	0	0	0	0	0	0	0	0	0	0	0	0	0	0
c484	3	1	d	1.2	-76	0	0	0	0	0	0	0	0	0	0	0	0	0	0	0	0	0	0	0	0	0	0	0	0	0	0	0	0	0	0	0	1	0	0	0	0	0	0	0	0	0	0	0	0
c485	3	1	e	0	404	0	0	0	0	0	0	0	0	0	0	0	0	0	0	0	0	0	0	0	0	0	0	0	0	0	0	0	0	0	0	0	0	0	0	0	0	0	0	0	0	0	0	0	0
c486	3	1	f	1	500	0	0	0	0	0	0	0	0	0	0	0	0	0	0	0	0	0	0	0	0	0	0	0	0	0	0	0	0	0	0	0	0	0	0	0	0	0	0	0	0	0	0	0	0
c487	3	1	g	2	-306	0	0	0	0	0	0	0	0	3	0	0	0	0	0	0	0	0	0	0	0	0	0	0	0	0	0	0	0	0	0	0	0	0	0	0	1	0	0	0	0	0	0	0	0
c488	3	1	h	2.5	357	0	0	0	0	0	0	0	0	0	0	0	0	0	0	0	0	0	0	0	0	0	0	0	0	0	0	0	0	0	0	0	0	0	0	0	0	0	0	0	0	0	0	0	0
c489	3	2	a	4	0	0	0	0	0	0	0	0	0	0	0	0	0	0	0	0	0	0	0	0	0	0	0	0	0	0	0	0	0	0	0	0	0	1	0	0	0	0	0	0	0	0	0	0	0
c490	3	2	b	4.5	51	0	0	0	0	0	0	0	0	3	0	0	0	0	0	0	0	0	0	0	0	0	0	0	0	0	0	0	0	0	0	0	0	0	0	0	0	0	0	0	0	0	0	0	0
c491	3	2	c	5.5	204	0	0	0	0	0	0	0	0	0	0	0	0	0	0	0	0	0	0	0	0	0	0	0	0	0	0	0	0	0	0	0	0	0	0	0	0	0	0	0	0	0	0	0	0
c492	3	2	d	5.2	-76	0	0	0	0	0	0	0	0	0	0	0	0	0	0	0	0	0	0	0	0	0	0	0	0	0	0	0	0	0	0	0	0	0	0	0	0	0	0	0	0	0	0	0	0
c493	3	2	e	4	404	0	0	0	0	1	0	0	0	29	0	0	0	0	0	0	0	0	0	0	0	0	0	0	0	0	0	0	0	0	0	0	0	0	0	0	0	0	0	0	0	0	0	0	0
c494	3	2	f	5	500	0	0	0	0	0	0	0	0	60	0	0	0	0	0	0	0	0	0	0	0	1	0	0	1	0	0	0	0	0	0	0	0	0	0	0	0	0	0	0	0	0	0	0	0
c495	3	2	g	6	-306	0	0	0	0	0	0	0	0	44	0	0	0	0	0	0	0	0	0	0	0	0	0	0	0	0	0	0	1	0	0	0	0	1	0	0	0	0	0	0	0	0	0	0	0
c496	3	2	h	6.5	357	0	0	0	0	0	0	0	0	21	0	0	0	0	0	0	0	0	0	0	0	0	0	0	0	0	0	0	1	0	0	0	0	0	0	0	0	0	0	0	0	0	0	0	0
c497	3	3	a	8	0	0	0	0	0	0	0	0	0	4	0	0	0	0	0	0	0	0	0	0	0	0	0	0	0	0	0	0	0	0	0	0	0	0	0	0	0	0	0	0	0	0	0	0	0
c498	3	3	b	8.5	51	0	0	0	0	0	0	0	0	5	0	0	0	0	0	0	0	0	0	0	0	0	0	0	0	0	0	0	0	0	0	0	0	0	0	0	0	0	0	0	0	0	0	0	0
c499	3	3	c	9.5	204	0	0	0	0	0	0	0	0	13	0	0	0	0	0	0	0	0	0	0	0	0	0	0	0	0	0	0	0	0	0	0	0	0	0	0	0	0	0	0	0	0	0	0	0
c500	3	3	d	9.2	-76	0	0	0	0	0	0	0	0	1	0	0	0	0	0	0	0	0	0	0	0	0	0	0	0	0	0	0	0	0	0	0	0	0	0	0	0	0	0	0	0	0	0	0	0
c501	3	3	e	8	404	0	0	0	0	0	0	0	0	3	0	0	0	0	0	0	0	0	0	0	0	0	0	0	0	0	0	0	0	0	0	0	0	0	0	0	0	0	0	0	0	0	0	0	0
c502	3	3	f	9	500	0	0	0	0	0	0	0	0	0	0	0	0	0	0	0	0	0	0	0	0	0	0	0	0	0	0	0	0	0	0	0	0	0	0	0	0	0	0	0	0	0	0	0	0
c503	3	3	g	10	-306	1	2	0	0	3	0	4	0	712	0	1	0	1	100	1	0	5	10	0	0	0	0	1	14	9	0	0	1	0	1	2	4	13	1	3	14	0	0	0	0	0	0	0	0
c504	3	3	h	10.5	357	0	1	0	0	0	0	0	0	63	0	0	0	3	0	0	0	1	1	0	0	0	0	0	4	0	0	0	0	0	0	0	3	8	0	1	4	0	0	0	0	0	0	0	0
c505	3	4	a	12	0	1	0	0	1	0	0	0	0	65	0	0	0	0	0	0	0	2	4	0	0	0	0	3	8	0	0	0	0	0	1	0	2	8	0	0	5	0	0	0	0	0	0	0	0
c506	3	4	b	12.5	51	2	5	0	11	0	0	1	0	207	0	6	0	4	2	0	0	11	7	0	0	1	0	4	49	0	0	2	1	1	2	0	10	34	2	1	30	0	0	0	0	0	0	0	0
c507	3	4	c	13.5	204	3	0	0	8	2	0	0	0	161	0	0	0	2	7	0	1	3	50	0	0	0	1	1	32	2	0	1	2	3	5	0	5	16	1	1	44	2	0	0	1	1	0	4	0
c508	3	4	d	13.2	-76	2	0	0	0	0	0	0	0	103	0	2	0	0	0	0	0	5	7	0	0	0	1	1	4	0	0	0	0	0	0	0	1	24	0	0	8	0	1	0	0	0	0	0	0
c509	3	4	e	12	404	0	2	0	5	2	0	0	0	142	0	0	0	1	4	1	0	2	3	0	0	0	0	0	11	0	0	0	0	0	0	0	4	8	0	1	6	0	0	0	0	0	0	0	0
c510	3	4	f	13	500	10	3	5	199	10	1	1	0	179	0	4	0	3	5	1	5	6	60	0	4	1	0	9	59	0	0	2	3	1	3	2	9	68	2	42	187	3	1	1	7	2	1	1	2
c511	3	4	g	14	-306	45	8	0	16	1	1	1	0	309	0	8	0	7	7	1	6	7	348	1	0	0	13	7	168	0	1	1	7	31	30	0	5	68	5	1	295	8	0	1	0	0	9	3	0
c512	3	4	h	14.5	357	1	2	1	5	12	0	9	0	1091	0	1	1	0	183	8	0	4	5	1	3	0	0	0	17	2	0	4	0	1	0	1	3	11	0	2	14	0	0	0	3	0	0	2	0
c513	3	5	a	9	800	36	40	0	212	4	0	7	0	444	0	140	0	43	17	0	11	66	44	0	0	5	0	78	504	0	0	5	14	1	6	0	6	296	42	4	476	0	2	4	2	1	1	1	0
c514	3	5	b	12.5	851	14	2	0	42	22	0	4	0	569	1	0	2	3	2	0	5	5	12	0	0	0	0	2	49	0	0	0	1	1	1	1	10	19	2	12	61	0	0	1	0	0	0	1	0
c515	3	5	c	13.5	1004	1	1	1	2	4	0	2	0	148	0	1	0	0	1	0	0	6	5	1	0	0	0	1	5	0	1	0	1	0	1	0	5	17	0	1	14	0	1	1	0	0	0	0	0
c516	3	5	d	13.2	724	1	1	1	5	9	0	1	0	445	1	2	0	3	56	1	0	0	5	0	0	0	0	0	11	8	0	0	0	1	0	1	5	17	0	2	13	0	0	0	0	0	0	1	0
c517	3	5	e	12	1204	13	2	0	67	35	0	2	0	694	0	2	0	3	1	0	5	5	10	1	0	0	1	1	35	1	0	0	1	1	2	0	4	48	0	16	81	0	1	0	3	0	0	0	0
c518	3	5	f	13	1300	1	6	0	168	8	0	0	0	154	0	1	0	3	9	0	6	2	41	1	0	2	2	7	25	0	0	5	2	0	7	1	10	46	0	35	99	1	0	0	4	0	0	1	0
c519	3	5	g	14	494	6	1	0	29	14	0	0	1	359	0	2	0	1	1	0	2	3	8	1	0	0	1	0	23	0	0	1	1	0	1	1	17	18	0	4	33	0	0	0	0	0	1	2	0
c520	3	5	h	14.5	1157	63	13	4	32	7	1	2	0	630	1	15	0	12	21	3	15	8	858	0	0	0	15	9	282	0	0	1	10	74	64	0	4	100	9	3	550	13	0	3	1	1	23	13	0
c521	3	6	a	8	800	3	1	0	4	0	0	0	0	87	0	2	0	0	0	0	0	2	2	0	0	0	0	1	9	0	0	0	0	0	0	0	4	10	1	0	6	0	0	0	0	1	0	0	0
c522	3	6	b	8.5	851	11	2	3	306	10	0	2	0	202	0	3	0	5	10	0	2	10	78	0	0	1	1	11	46	3	3	4	1	1	7	1	15	77	5	74	148	0	0	0	5	0	0	4	0
c523	3	6	c	9.5	1004	0	0	0	0	0	0	0	0	0	0	0	0	0	0	0	0	0	0	0	0	0	0	0	0	0	0	0	0	0	0	0	0	0	0	0	0	0	0	0	0	0	0	0	0
c524	3	6	d	9.2	724	1	0	3	12	0	0	0	0	94	0	3	0	0	5	0	0	10	6	0	0	0	0	2	8	0	0	0	1	0	1	0	2	8	0	2	29	0	0	0	0	0	0	0	0
c525	3	6	e	8	1204	0	0	0	7	0	0	0	0	17	0	0	0	1	0	0	0	0	2	0	0	0	1	0	0	0	0	1	1	1	0	0	1	2	0	1	6	1	0	0	0	0	0	0	0
c526	3	6	f	9	1300	0	0	0	0	0	0	0	0	0	0	0	0	0	0	0	0	0	0	0	0	0	0	0	0	0	0	0	0	0	0	0	0	0	0	0	0	0	0	0	0	0	0	0	0
c527	3	6	g	10	494	3	1	0	4	0	0	0	0	115	0	1	0	1	3	0	0	1	2	0	0	0	1	1	6	0	1	0	0	0	0	0	2	14	0	0	8	0	0	0	0	0	0	1	0
c528	3	6	h	10.5	1157	2	0	1	4	1	0	3	0	209	0	2	0	0	15	2	0	3	4	0	0	0	0	0	4	1	1	0	1	0	3	0	2	13	0	1	9	0	0	0	0	0	0	0	0
c529	3	7	a	4	800	2	2	0	8	1	0	0	0	57	0	0	0	0	1	0	0	0	7	0	0	0	0	2	3	0	0	0	2	0	0	0	2	10	0	2	8	0	1	0	0	0	0	0	0
c530	3	7	b	4.5	851	4	1	0	5	15	0	1	0	212	1	5	0	4	5	1	0	13	28	1	0	0	0	4	33	0	2	3	2	1	4	0	8	34	1	4	44	1	0	1	1	2	0	0	0
c531	3	7	c	5.5	1004	0	0	0	3	1	0	1	0	114	0	1	0	2	1	0	1	4	7	0	0	0	0	1	7	1	0	1	0	0	0	0	6	8	0	2	8	0	0	0	0	0	0	0	0
c532	3	7	d	5.2	724	0	2	0	3	0	0	0	0	189	0	0	0	0	1	0	0	3	13	0	1	0	0	0	18	0	0	0	1	1	0	0	1	14	0	2	10	0	1	0	0	0	0	0	0
c533	3	7	e	4	1204	3	0	6	24	1	0	0	1	146	1	4	0	2	28	0	1	73	36	1	0	0	0	4	53	1	1	0	2	0	0	0	4	30	1	0	145	0	0	1	1	0	2	2	0
c534	3	7	f	5	1300	0	0	0	2	0	0	0	0	63	0	0	0	0	1	0	0	1	4	0	0	0	0	0	11	0	1	0	0	0	0	0	3	5	0	1	8	0	0	0	0	0	0	0	0
c535	3	7	g	6	494	3	1	0	7	2	0	0	1	166	0	1	0	1	3	0	0	5	18	0	0	0	0	1	12	0	0	0	0	1	3	0	2	24	0	0	25	0	0	0	0	0	0	0	0
c536	3	7	h	6.5	1157	8	9	0	32	2	0	1	0	145	1	30	0	17	3	0	2	13	18	0	0	1	0	23	109	1	0	2	5	0	2	0	5	72	13	1	116	0	1	1	0	1	0	1	0
c537	3	8	a	4	1600	15	57	32	172	1	0	2	4	658	2	48	0	39	110	1	7	1254	213	10	1	5	0	33	846	14	2	3	11	1	7	0	6	180	40	21	1525	0	33	12	3	0	19	8	0
c538	3	8	b	4.5	1651	0	0	1	2	7	0	7	0	552	1	0	0	0	81	1	0	4	2	0	0	0	1	1	11	5	0	2	0	0	1	0	6	19	1	1	17	0	1	0	0	0	0	0	0
c539	3	8	c	5.5	1804	2	1	0	20	0	0	0	0	64	0	3	0	0	0	0	1	4	9	0	1	0	0	1	5	0	0	0	0	0	3	0	5	13	0	3	20	0	0	0	0	0	0	0	0
c540	3	8	d	5.2	1524	18	9	5	28	53	0	1	0	580	2	8	0	7	12	2	4	6	63	5	6	0	1	15	86	3	4	8	1	0	11	1	10	57	12	2	114	0	0	0	0	0	0	0	0
c541	3	8	e	4	2004	0	0	0	0	0	0	0	0	1	0	0	0	0	0	0	0	0	0	0	0	0	0	0	0	0	0	0	0	0	0	0	0	0	0	0	0	0	0	0	0	0	0	0	0
c542	3	8	f	5	2100	88	40	17	151	268	3	7	1	1787	1	88	0	88	49	5	22	27	498	18	18	3	5	86	572	2	35	40	10	1	88	1	4	669	49	14	659	3	1	14	4	3	1	3	1
c543	3	8	g	6	1294	6	1	1	79	13	0	2	0	570	0	7	1	0	3	0	5	2	10	0	0	0	0	5	37	0	0	1	2	0	0	0	7	42	4	9	80	0	0	0	0	0	1	1	0
c544	3	8	h	6.5	1957	56	5	0	30	1	0	1	0	377	0	10	0	9	12	0	13	4	332	0	1	0	2	5	140	1	0	2	4	35	66	0	5	76	2	0	236	9	1	0	4	0	8	3	0
c545	3	9	a	8	1600	24	209	0	48	6	3	1	5	10773	4	29	0	140	17	2	8	130	378	2	21	3	1	13	914	63	3	19	17	2	47	0	60	166	25	47	322	2	78	2	8	0	7	1	0
c546	3	9	b	8.5	1651	0	0	0	3	0	0	1	1	1160	0	1	0	2	2	0	0	2	7	0	0	0	0	0	13	0	1	0	0	0	0	0	3	13	0	3	20	1	1	0	0	0	0	0	0
c547	3	9	c	9.5	1804	2	0	0	7	3	0	0	0	190	0	2	0	3	3	1	0	8	4	0	1	0	0	1	12	2	1	4	0	1	2	0	3	15	1	0	10	0	0	0	0	0	0	0	0
c548	3	9	d	9.2	1524	1	1	0	7	2	0	3	0	181	0	2	0	0	2	0	1	2	15	0	0	0	0	1	10	1	1	0	0	0	0	0	71	36	0	1	18	0	3	0	1	0	0	1	0
c549	3	9	e	8	2004	3	0	0	2	1	0	0	0	179	0	2	0	2	2	0	0	3	7	1	1	0	0	2	15	1	1	6	0	0	5	0	3	20	0	1	20	0	1	0	0	1	0	0	1
c550	3	9	f	9	2100	2	2	0	2	2	0	3	0	163	0	1	0	2	4	0	0	2	7	0	2	0	0	0	7	0	0	3	0	0	0	0	2	11	0	1	9	0	0	0	0	0	0	0	0
c551	3	9	g	10	1294	1	0	1	7	0	0	0	0	245	0	1	0	0	1	0	1	7	10	0	3	0	0	0	17	1	1	2	1	0	2	0	5	30	0	0	24	0	0	0	1	0	0	1	0
c552	3	9	h	10.5	1957	22	1	0	12	3	0	7	0	414	0	3	0	3	5	0	2	8	17	0	4	0	1	1	26	3	1	9	1	1	1	0	625	97	0	5	27	0	1	0	4	0	0	0	0
c553	3	10	a	12	1600	7	2	0	13	1	0	4	0	299	1	0	0	0	4	0	0	6	16	0	2	0	0	5	23	0	1	5	2	0	3	1	618	93	2	2	25	0	2	0	1	3	0	2	0
c554	3	10	b	12.5	1651	0	0	0	0	0	0	0	0	47	0	0	0	0	0	0	0	0	0	0	0	0	0	0	1	0	0	0	0	0	1	0	0	7	0	0	0	0	0	0	0	1	0	0	0
c555	3	10	c	13.5	1804	0	0	0	1	0	0	0	0	5	0	0	0	0	0	0	0	0	2	0	0	0	0	0	0	0	0	0	0	0	0	0	0	0	0	0	0	0	0	0	0	0	0	0	0
c556	3	10	d	13.2	1524	26	3	3	14	9	0	14	0	909	1	5	1	7	13	4	2	14	20	0	3	5	1	15	55	0	6	22	1	1	2	2	2372	218	0	5	90	0	2	0	8	3	0	2	0
c557	3	10	e	12	2004	23	7	1	51	8	0	13	0	22793	4	2	0	17	3	1	2	9	53	2	1	2	11	163	617	4	35	4	2	15	11	0	11	2096	2	89	89	0	0	0	9	27	1	1	0
c558	3	10	f	13	2100	0	0	0	1	0	0	0	0	6	0	0	0	0	0	0	0	0	1	0	0	0	0	0	0	0	0	0	0	0	0	0	1	2	0	0	1	0	0	0	0	0	0	0	0
c559	3	10	g	14	1294	0	0	0	0	0	0	0	0	6	0	0	0	0	0	0	0	0	0	0	0	0	0	0	0	0	0	0	0	0	0	0	0	2	0	0	0	0	0	0	0	0	0	0	0
c560	3	10	h	14.5	1957	1	0	0	0	0	0	0	0	7	0	0	0	0	0	0	0	0	0	0	0	0	0	0	0	0	0	0	0	0	0	0	4	1	0	0	0	0	0	0	0	0	0	0	0
c561	8	1	a	0	0	0	0	0	0	0	0	0	0	7	0	0	0	0	1	0	0	0	0	0	0	0	0	0	0	0	0	1	0	0	0	0	0	1	0	0	0	0	0	0	0	0	0	0	0
c562	8	1	b	0.5	51	0	0	0	1	0	0	0	0	2	0	0	0	0	0	0	1	0	0	0	0	0	0	0	0	0	0	0	0	0	0	0	0	0	0	0	0	0	0	0	0	0	0	0	0
c563	8	1	c	1.5	204	0	0	0	0	0	0	0	0	0	0	0	0	0	0	0	0	0	0	0	0	0	0	0	0	0	0	0	0	0	0	0	0	1	0	0	0	0	0	0	0	0	0	0	0
c564	8	1	d	1.2	-76	0	0	0	0	0	0	0	0	4	0	0	0	0	0	0	0	0	0	0	0	0	0	0	0	0	0	0	0	0	0	0	0	3	0	0	0	0	0	0	0	0	0	0	0
c565	8	1	e	0	404	0	0	0	0	0	0	0	0	0	0	0	0	0	0	0	0	0	0	0	0	0	0	0	0	0	0	0	0	0	0	0	0	0	0	0	0	0	0	0	0	0	0	0	0
c566	8	1	f	1	500	0	0	0	0	0	0	0	0	9	0	0	0	0	0	0	0	0	0	0	0	0	0	0	0	0	0	0	0	0	0	0	0	0	0	0	0	0	0	0	0	0	0	0	0
c567	8	1	g	2	-306	0	0	0	0	0	0	0	0	4	0	0	0	0	0	0	0	1	0	0	0	0	0	0	0	0	0	0	0	0	0	0	0	1	0	0	0	0	0	0	0	0	0	0	0
c568	8	1	h	2.5	357	0	0	0	0	0	0	0	0	25	0	0	0	0	0	0	0	0	0	0	0	0	0	0	4	0	0	0	0	0	0	0	0	8	0	1	0	0	0	0	1	0	0	0	0
c569	8	2	a	4	0	0	0	0	0	0	0	0	0	6	0	0	0	0	0	0	0	0	0	0	0	0	0	0	0	0	0	0	0	0	0	0	1	0	0	0	1	0	0	0	0	0	0	0	0
c570	8	2	b	4.5	51	0	0	0	1	0	0	1	0	6	0	0	0	0	0	0	0	0	1	0	0	0	0	0	2	0	0	0	0	0	0	0	0	1	0	0	4	0	0	0	0	0	0	0	0
c571	8	2	c	5.5	204	0	0	0	0	0	0	0	0	1	0	0	0	0	0	0	0	0	0	0	0	0	0	0	0	0	0	0	0	0	0	0	0	0	0	0	0	0	0	0	0	0	0	0	0
c572	8	2	d	5.2	-76	0	0	0	0	0	0	0	0	21	0	0	0	0	1	0	0	0	0	0	0	0	0	0	4	0	0	0	0	0	0	0	0	2	0	0	7	0	0	0	0	0	0	0	0
c573	8	2	e	4	404	0	0	0	0	0	0	0	0	9	0	0	0	0	1	0	0	0	0	0	0	0	0	1	6	0	0	0	0	0	0	0	0	0	0	0	2	0	0	0	0	0	0	0	0
c574	8	2	f	5	500	0	0	0	0	0	0	0	0	0	0	0	0	0	0	0	0	0	0	0	0	0	0	0	0	0	0	0	0	0	0	0	0	0	0	0	0	0	0	0	0	0	0	0	0
c575	8	2	g	6	-306	1	0	0	1	0	0	0	0	37	0	1	0	1	2	1	0	0	0	0	0	0	0	0	12	0	0	0	0	1	0	0	0	2	0	0	2	0	0	0	0	0	1	0	0
c576	8	2	h	6.5	357	5	1	0	8	0	0	1	0	39	0	1	0	4	2	1	2	1	23	0	0	0	0	0	209	0	0	0	11	6	2	0	0	10	1	3	50	1	0	0	0	0	0	2	0
c577	8	3	a	8	0	0	0	0	0	0	0	0	0	14	0	0	0	0	0	0	0	0	1	0	0	0	0	0	1	0	0	0	0	0	0	0	0	2	0	1	1	0	0	0	0	0	0	0	0
c578	8	3	b	8.5	51	65	111	0	208	2	4	3	2	1195	6	273	0	69	101	0	28	109	51	0	0	3	0	211	1123	0	2	18	59	1	23	0	0	1494	41	13	1101	0	1	5	2	2	7	0	4
c579	8	3	c	9.5	204	2	0	0	1	1	0	1	0	414	1	2	0	0	73	0	0	1	4	0	0	0	0	0	11	3	0	1	0	0	0	2	1	9	0	3	10	0	0	0	0	0	0	0	0
c580	8	3	d	9.2	-76	0	1	0	0	2	0	0	0	38	0	1	0	2	1	0	0	0	1	0	0	0	0	0	8	0	0	0	1	0	0	0	0	5	0	0	3	0	0	0	0	0	0	0	0
c581	8	3	e	8	404	0	0	0	0	0	0	0	0	0	0	0	0	0	0	0	0	0	0	0	0	0	0	0	0	0	0	0	0	0	0	0	0	0	0	0	0	0	0	0	0	0	0	0	0
c582	8	3	f	9	500	0	0	0	3	0	0	0	0	3	0	0	0	0	0	0	0	0	0	0	0	0	0	0	1	0	0	0	0	0	0	0	0	1	0	1	3	0	1	0	0	0	0	0	0
c583	8	3	g	10	-306	0	1	0	1	0	0	1	0	24	1	0	0	0	1	0	1	0	2	0	0	0	0	0	12	0	0	0	1	0	1	0	0	2	1	0	5	0	0	0	0	0	0	1	0
c584	8	3	h	10.5	357	10	6	3	36	13	0	31	14	1401	3	13	4	9	2	0	11	6	39	0	2	0	2	2	122	0	1	3	5	1	1	1	5	94	5	39	101	2	21	0	2	0	0	1	1
c585	8	4	a	12	0	1	1	0	1	1	0	3	0	231	1	1	0	0	35	0	0	4	2	0	0	0	0	0	6	2	0	2	0	1	0	3	2	5	0	3	7	0	0	0	0	0	0	0	0
c586	8	4	b	12.5	51	0	0	0	2	1	0	1	0	58	0	0	0	1	0	0	0	0	0	0	0	0	0	4	13	0	0	0	1	0	0	0	0	6	0	0	5	0	0	0	0	0	0	0	0
c587	8	4	c	13.5	204	1	1	0	0	3	0	9	2	805	2	0	0	2	148	1	2	0	1	0	1	0	0	1	16	4	0	4	1	0	0	5	0	8	0	8	17	0	0	0	0	0	0	0	0
c588	8	4	d	13.2	-76	1	0	1	6	0	0	4	0	122	0	2	0	1	2	0	1	0	5	0	0	0	0	1	14	0	0	1	1	0	0	0	0	8	1	2	12	0	0	1	0	0	0	0	1
c589	8	4	e	12	404	1	0	0	0	0	0	1	0	46	0	2	0	0	2	0	1	1	2	0	0	0	0	0	12	0	0	0	0	0	0	0	0	0	1	0	9	0	1	0	0	0	0	0	0
c590	8	4	f	13	500	1	1	0	1	0	0	0	0	33	0	1	0	0	0	1	0	1	1	0	0	0	1	0	12	0	0	0	1	0	1	0	0	5	0	0	6	0	0	1	0	0	0	0	0
c591	8	4	g	14	-306	0	0	0	1	0	0	0	0	20	0	0	0	0	1	1	0	2	1	0	0	0	0	0	4	0	0	0	0	0	0	0	0	3	0	1	5	0	0	0	0	0	0	0	0
c592	8	4	h	14.5	357	0	0	0	0	0	0	0	0	36	0	1	0	0	0	0	0	0	1	0	0	0	0	1	8	0	0	0	0	0	0	0	1	1	0	1	7	0	0	0	1	0	0	0	0
c593	8	5	a	9	800	0	0	0	0	0	0	0	0	0	0	0	0	0	0	0	0	0	0	0	0	0	0	0	0	0	0	0	0	0	0	0	0	0	0	0	0	0	0	0	0	0	0	0	0
c594	8	5	b	12.5	851	1	0	0	3	3	0	1	0	41	0	3	0	1	1	0	1	4	9	0	1	0	1	1	6	0	1	5	0	0	1	0	0	21	1	0	13	0	0	1	0	0	0	0	0
c595	8	5	c	13.5	1004	0	1	0	0	1	0	0	0	2	0	0	0	0	0	0	0	0	0	0	0	0	0	0	10	0	0	0	0	0	1	0	0	0	0	0	1	0	0	0	0	0	0	0	0
c596	8	5	d	13.2	724	0	0	0	0	0	0	0	0	4	0	0	0	0	0	0	0	0	0	0	0	0	0	0	1	0	0	0	1	0	0	0	0	0	0	1	0	0	0	0	0	0	0	0	0
c597	8	5	e	12	1204	0	4	0	2	0	0	2	0	410	3	3	0	3	0	0	1	7	8	0	1	0	1	1	61	0	0	0	1	0	1	0	4	14	3	7	19	0	1	0	0	0	0	0	0
c598	8	5	f	13	1300	3	6	11	5	2	0	0	0	140	10	7	0	5	29	0	0	265	52	5	0	0	0	4	159	2	0	1	4	0	5	0	0	57	3	7	306	0	6	2	0	0	3	0	0
c599	8	5	g	14	494	0	0	0	0	0	0	0	0	8	0	0	0	0	0	0	0	1	1	0	0	0	0	0	0	0	0	0	0	0	0	0	0	0	0	0	1	0	0	0	0	0	0	0	0
c600	8	5	h	14.5	1157	1	0	0	0	0	0	0	0	16	0	0	0	1	0	0	0	3	1	0	0	0	0	1	5	0	0	0	0	0	1	0	0	1	0	1	5	0	0	0	0	0	0	0	0
c601	8	6	a	8	800	0	0	0	1	0	0	1	0	53	0	0	0	1	2	0	1	0	4	0	0	0	0	0	14	0	0	1	0	0	1	0	0	0	0	2	7	0	0	0	0	0	0	0	0
c602	8	6	b	8.5	851	1	1	1	1	0	0	1	0	14	1	0	1	1	4	0	1	16	10	0	0	0	0	1	11	0	0	0	0	1	0	0	0	3	0	0	17	0	3	0	0	0	0	0	0
c603	8	6	c	9.5	1004	1	0	0	0	1	0	0	0	15	0	0	0	0	0	0	0	0	1	0	0	0	0	0	11	0	0	0	0	0	0	0	0	4	0	0	4	0	0	0	0	0	0	0	0
c604	8	6	d	9.2	724	0	1	0	2	1	0	0	0	28	0	1	0	1	2	0	0	0	1	0	0	0	0	1	17	0	0	0	0	0	0	0	0	6	0	1	9	0	0	0	0	0	0	0	0
c605	8	6	e	8	1204	1	1	0	1	0	0	0	0	31	0	0	0	0	1	0	0	2	1	0	0	0	0	1	5	0	0	0	1	0	1	0	0	2	0	0	2	0	0	0	0	0	0	0	0
c606	8	6	f	9	1300	1	1	0	1	0	0	0	0	26	0	1	0	0	3	0	0	0	3	0	0	0	0	0	14	0	0	0	1	0	0	0	0	2	0	2	5	0	0	0	0	0	0	0	0
c607	8	6	g	10	494	0	0	0	0	0	0	0	0	11	0	0	0	0	0	0	0	1	2	0	0	0	0	1	8	0	0	0	0	0	0	0	1	0	0	1	2	0	0	0	0	0	0	0	0
c608	8	6	h	10.5	1157	0	0	0	0	0	0	0	0	0	0	0	0	0	0	0	0	0	0	0	0	0	0	0	0	0	0	0	0	0	0	0	0	0	0	0	0	0	0	0	0	0	0	0	0
c609	8	7	a	4	800	0	0	0	3	1	0	1	0	61	0	0	0	0	0	0	0	0	1	0	0	0	0	1	10	0	0	0	0	1	0	0	0	4	0	0	4	0	1	0	0	0	0	0	0
c610	8	7	b	4.5	851	2	6	0	7	1	0	0	0	71	0	11	0	6	4	0	1	8	5	0	0	1	0	7	62	0	0	0	1	0	1	0	1	49	1	1	40	0	1	0	0	0	0	0	0
c611	8	7	c	5.5	1004	2	7	5	10	0	0	2	0	75	12	6	0	0	19	0	1	180	35	6	0	0	0	5	174	0	1	0	3	0	1	0	1	53	3	2	212	0	2	0	0	0	1	1	0
c612	8	7	d	5.2	724	16	5	2	13	64	0	0	0	269	1	11	0	8	7	3	0	3	73	0	0	0	1	15	97	1	4	5	1	0	10	0	5	95	1	8	141	1	0	0	0	2	1	0	2
c613	8	7	e	4	1204	0	0	0	0	1	0	2	0	47	0	0	0	0	6	0	0	2	3	0	0	0	0	0	13	0	0	1	1	0	1	1	0	1	0	1	8	0	0	0	0	0	0	0	0
c614	8	7	f	5	1300	0	0	0	2	1	0	0	0	17	0	0	0	0	2	0	0	1	3	0	0	0	0	4	4	0	0	0	1	0	1	0	0	3	0	0	9	0	0	0	0	0	0	0	0
c615	8	7	g	6	494	1	3	1	1	1	0	0	0	19	0	3	0	2	5	0	1	3	3	1	0	0	1	1	14	0	1	1	0	0	1	0	0	9	1	1	35	0	0	0	0	0	0	0	0
c616	8	7	h	6.5	1157	0	0	0	1	0	0	0	0	2	0	0	0	0	0	0	0	0	1	0	0	0	0	0	1	0	0	0	0	1	0	0	0	0	0	0	0	0	0	0	0	0	0	0	0
c617	8	8	a	4	1600	0	0	0	0	0	0	0	0	0	0	0	0	0	0	0	0	0	0	0	0	0	0	0	0	0	0	0	0	0	0	0	0	0	0	0	0	0	0	0	0	0	0	0	0
c618	8	8	b	4.5	1651	0	0	0	1	0	0	0	0	0	0	0	0	0	0	0	0	2	0	0	0	0	0	1	2	0	0	0	0	0	0	0	0	2	0	0	0	0	0	0	0	0	0	0	0
c619	8	8	c	5.5	1804	0	0	0	0	1	0	0	0	3	0	0	0	0	0	0	0	0	0	0	0	0	0	0	2	0	0	0	0	0	0	0	0	0	0	0	0	0	0	0	0	0	0	0	0
c620	8	8	d	5.2	1524	32	8	0	21	1	0	2	0	73	0	4	1	3	6	5	4	4	130	0	0	0	2	1	683	0	1	2	15	28	33	0	0	44	5	5	132	5	1	0	0	0	1	3	0
c621	8	8	e	4	2004	18	133	0	25	13	2	4	6	11005	51	20	0	251	22	0	15	128	225	1	14	0	7	28	1633	79	10	13	17	3	89	1	133	310	21	140	459	1	100	2	5	1	9	0	2
c622	8	8	f	5	2100	0	0	0	0	0	0	0	0	0	0	0	0	0	0	0	0	0	0	0	0	0	0	0	0	0	0	0	0	0	0	0	0	0	0	0	0	0	0	0	0	0	0	0	0
c623	8	8	g	6	1294	0	0	0	0	0	0	0	0	0	0	0	0	0	0	0	0	0	0	0	0	0	0	0	0	0	0	0	0	0	0	0	0	0	0	0	0	0	0	0	0	0	0	0	0
c624	8	8	h	6.5	1957	0	0	0	0	0	0	0	0	0	0	0	0	0	0	0	0	0	0	0	0	0	0	0	0	0	0	0	0	0	0	0	0	0	0	0	0	0	0	0	0	0	0	0	0
c625	8	9	a	8	1600	0	0	0	0	0	0	0	0	5	0	1	0	0	0	0	0	0	0	0	0	0	0	0	4	0	0	0	0	0	0	0	0	0	0	0	0	0	0	0	0	0	0	0	0
c626	8	9	b	8.5	1651	0	0	0	0	0	0	0	0	1	0	1	0	0	0	0	0	0	0	0	0	0	0	0	1	0	0	0	0	0	0	0	0	0	0	1	0	0	0	0	0	0	0	0	0
c627	8	9	c	9.5	1804	0	0	0	0	0	0	0	0	0	0	0	0	0	1	0	0	0	0	0	0	0	0	0	0	0	0	0	0	0	0	0	0	0	0	0	0	0	0	0	0	0	0	0	0
c628	8	9	d	9.2	1524	0	0	0	0	0	0	0	0	0	0	0	0	0	0	0	0	0	0	0	0	0	0	0	0	0	0	0	0	0	0	0	0	0	0	0	0	0	0	0	0	0	0	0	0
c629	8	9	e	8	2004	0	0	0	0	0	0	0	0	2	0	0	0	0	0	0	0	0	0	0	0	0	0	0	1	0	0	0	0	0	0	0	0	0	0	0	0	0	0	0	0	0	0	0	0
c630	8	9	f	9	2100	0	0	0	0	0	0	1	0	3	0	0	0	0	0	0	0	0	0	0	0	0	0	0	4	0	0	0	0	0	0	0	0	1	0	0	1	0	0	0	0	0	0	0	0
c631	8	9	g	10	1294	0	0	0	0	0	0	0	0	0	0	0	0	0	0	0	0	0	0	0	0	0	0	0	0	0	0	0	0	0	0	0	0	0	0	0	1	0	0	0	0	0	0	0	0
c632	8	9	h	10.5	1957	0	0	0	0	0	0	0	0	0	0	0	0	0	0	0	0	0	0	0	0	0	0	0	0	0	0	0	0	0	0	0	0	0	0	0	0	0	0	0	0	0	0	0	0
c633	8	10	a	12	1600	0	0	0	0	0	0	0	0	0	0	0	0	0	0	0	0	0	0	0	0	0	0	0	0	0	0	0	0	0	0	0	0	0	0	0	0	0	0	0	0	0	0	0	0
c634	8	10	b	12.5	1651	0	0	0	0	0	0	0	0	0	0	0	0	0	0	0	0	0	0	0	0	0	0	0	0	0	0	0	0	0	0	0	0	0	0	0	0	0	0	0	0	0	0	0	0
c635	8	10	c	13.5	1804	0	0	0	0	0	0	0	0	0	0	0	0	0	0	0	0	0	1	0	0	0	0	0	0	0	0	0	0	0	0	0	0	0	0	0	0	0	0	0	0	0	0	0	0
c636	8	10	d	13.2	1524	0	0	0	0	0	0	0	0	0	0	0	0	0	0	0	0	0	0	0	0	0	0	0	0	0	0	0	0	0	0	0	0	0	0	0	0	0	0	0	0	0	0	0	0
c637	8	10	e	12	2004	0	0	0	0	0	0	0	0	0	0	0	0	0	0	0	0	0	0	0	0	0	0	0	0	0	0	0	0	0	0	0	0	0	0	0	0	0	0	0	0	0	0	0	0
c638	8	10	f	13	2100	0	0	0	0	0	0	0	1	0	0	0	0	0	0	0	0	0	0	0	0	0	0	0	1	0	0	0	0	0	0	0	0	0	0	0	0	0	0	0	0	0	0	0	0
c639	8	10	g	14	1294	0	0	0	0	0	0	0	0	0	0	0	0	0	0	0	0	0	0	0	0	0	0	0	0	0	0	0	0	0	0	0	0	0	0	0	0	0	0	0	0	0	0	0	0
c640	8	10	h	14.5	1957	0	0	0	0	0	0	0	0	0	0	0	0	0	0	0	0	0	0	0	0	0	0	0	2	0	0	0	1	0	0	0	0	0	0	0	1	0	0	0	0	0	0	0	0
c641	4	1	a	0	0	0	0	0	0	0	0	0	0	2	0	0	0	0	0	0	0	0	0	0	0	0	0	1	0	0	0	0	0	0	0	0	0	0	0	0	0	0	0	0	0	0	0	0	0
c642	4	1	b	0.5	51	0	0	0	2	0	0	42	4	11	6	29	2610	0	0	0	0	2	0	0	2	1	0	0	10	0	4	0	0	7	0	0	0	4	0	0	0	1	1	0	0	0	10	2	15
c643	4	1	c	1.5	204	1	0	0	0	0	0	18	1	13	3	31	235	0	0	0	0	1	1	0	6	0	0	0	47	0	0	0	1	21	0	0	2	0	0	0	0	3	1	1	0	0	30	12	8
c644	4	1	d	1.2	-76	0	0	0	8	0	5	82	25	21	51	578	8639	0	0	0	14	16	0	2	3	2	1	6	24	1	4	0	0	13	0	0	1	2	0	12	0	4	26	3	0	0	69	7	38
c645	4	1	e	0	404	5	0	0	3	0	0	254	15	1492	16	315	3570	2	0	2	2	99	0	0	11	0	0	4	74	16	1	4	0	6	0	0	0	15	1	2	0	15	7	0	2	0	90	2	220
c646	4	1	f	1	500	0	0	0	0	0	0	54	0	5	4	17	214	0	0	0	1	1	0	0	4	0	0	4	1	0	0	0	0	2	0	0	0	12	0	0	0	0	1	0	0	0	0	1	2
c647	4	1	g	2	-306	0	0	30	1	0	2	202	5	34	11	182	1431	0	2	2	2	7	1	1	11	9	0	1	40	0	0	0	0	10	1	0	0	11	0	2	10	2	3	0	0	0	10	6	28
c648	4	1	h	2.5	357	7	1	1	37	4	0	540	55	549	163	1035	32303	1	3	1	13	136	0	2	24	0	3	11	130	13	8	2	0	10	0	0	0	4	148	6	0	43	7	2	4	0	165	68	125
c649	4	2	a	4	0	6	7	0	102	1	3	3336	200	199	383	1337	114791	0	16	14	5	109	4	9	85	5	23	46	312	28	22	4	5	1453	5	0	21	16	3	6	5	876	150	34	4	0	497	49	768
c650	4	2	b	4.5	51	1	0	0	0	4	0	121	0	40	2	202	442	0	0	10	1	3	1	0	4	0	1	0	15	0	0	0	0	9	2	0	1	3	0	0	0	19	1	0	0	0	5	2	31
c651	4	2	c	5.5	204	0	0	0	0	0	0	0	0	1	0	0	0	0	0	0	0	0	0	0	0	0	0	0	0	0	0	0	0	0	0	0	0	0	0	0	0	0	0	0	0	0	0	0	0
c652	4	2	d	5.2	-76	0	0	0	1	0	1	43	1	21	9	221	755	0	0	1	1	1	0	0	2	0	0	0	27	0	1	0	0	7	0	1	0	0	0	0	1	4	0	0	0	0	90	7	14
c653	4	2	e	4	404	0	0	0	0	0	0	17	0	6	2	39	640	0	0	0	0	5	0	0	2	0	0	0	8	0	0	1	0	3	0	0	0	0	1	0	1	2	0	0	0	0	3	4	7
c654	4	2	f	5	500	0	0	0	0	0	0	39	1	9	5	49	547	0	0	0	0	6	0	0	1	0	0	0	3	0	0	1	0	10	0	0	0	1	0	0	0	1	2	0	0	0	5	3	20
c655	4	2	g	6	-306	0	0	0	0	0	0	18	1	20	1	33	340	0	0	0	0	5	0	0	2	0	0	0	6	0	0	0	0	5	0	0	1	19	0	0	0	3	2	0	0	0	2	0	92
c656	4	2	h	6.5	357	0	0	0	0	0	0	34	0	53	0	48	804	0	0	0	1	3	0	1	4	0	0	2	16	2	0	0	0	11	0	0	0	2	0	0	1	3	0	0	0	0	5	0	8
c657	4	3	a	8	0	0	1	0	2	1	0	55	2	32	10	37	1436	0	0	2	0	6	0	0	4	0	0	0	42	0	2	0	0	5	0	0	0	26	0	0	0	1	1	0	0	0	7	1	13
c658	4	3	b	8.5	51	0	0	1	5	0	0	92	29	22	25	44	8061	0	1	0	0	5	0	0	4	0	0	1	36	2	2	0	0	5	0	0	0	13	0	0	0	1	0	1	0	0	39	4	16
c659	4	3	c	9.5	204	1	4	0	4	1	0	2123	4	114	23	1193	3730	1	1	214	0	14	1	0	113	0	0	0	20	0	0	0	0	4	1	0	12	3	0	3	1	12	2	5	3	0	86	14	71
c660	4	3	d	9.2	-76	0	0	0	0	0	0	44	0	35	1	229	1076	0	0	1	0	44	0	0	50	0	0	3	15	12	0	0	0	2	0	0	0	29	0	0	0	1	0	0	0	0	38	4	20
c661	4	3	e	8	404	20	3	1	6	0	1	1386	6	2756	303	2090	4545	4	14	1	1	752	1	4	143	251	48	7	647	0	1	8	2	2621	0	0	45	10	0	6	110	197	6	0	0	0	53	52	225
c662	4	3	f	9	500	0	0	0	2	0	0	15	0	2	2	88	224	0	0	1	0	1	0	0	1	0	0	1	3	0	1	0	0	3	0	0	1	1	0	0	0	1	1	0	0	0	33	5	4
c663	4	3	g	10	-306	0	0	0	0	0	0	0	0	0	0	0	1	0	0	0	0	0	0	0	0	0	0	0	0	0	0	0	0	0	0	0	0	0	0	0	0	0	0	0	0	0	0	0	0
c664	4	3	h	10.5	357	8	9	0	35	13	11	3075	12	1205	248	1520	6484	1	32	3	4	235	20	12	135	7	52	12	257	0	3	8	2	292	0	3	3	186	2	7	4	14	8	1	0	1	87	45	762
c665	4	4	a	12	0	0	0	0	1	0	0	12	0	12	1	64	145	0	0	0	1	2	0	0	2	0	1	0	4	1	0	0	0	0	0	0	0	0	0	0	0	2	1	0	0	0	4	3	6
c666	4	4	b	12.5	51	0	6	0	26	0	1	385	32	64	55	414	18276	4	0	8	8	27	1	1	17	1	3	7	145	1	7	1	1	37	0	0	0	16	0	0	0	22	4	4	1	0	116	43	180
c667	4	4	c	13.5	204	5	16	5	14	6	2	749	14	101	142	1222	6159	0	16	31	0	49	1	11	148	1	0	6	238	39	0	0	1	1	0	5	0	5	0	4	1	27	0	10	2	1	71	161	1173
c668	4	4	d	13.2	-76	2	0	2	11	0	0	3082	25	26	23	180	9062	0	0	75	0	2	0	0	3	1	0	4	353	0	1	0	0	5	0	0	0	1	1	1	0	4	18	0	0	0	57	15	136
c669	4	4	e	12	404	3	0	0	1	0	0	44	1	13	25	255	739	2	2	0	0	3	0	0	17	0	0	1	17	0	0	0	0	11	0	0	0	6	0	2	2	0	3	0	0	0	29	0	55
c670	4	4	f	13	500	0	0	0	1	0	3	76	4	40	22	181	961	0	0	2	2	3	0	1	33	1	1	0	32	0	0	0	0	3	0	0	1	5	0	1	0	5	1	0	0	0	9	1	27
c671	4	4	g	14	-306	0	0	0	0	0	1	37	8	11	5	28	2300	0	1	0	0	1	0	0	2	0	0	0	8	1	1	0	0	5	0	0	0	0	0	0	1	2	0	0	0	1	6	2	11
c672	4	4	h	14.5	357	0	2	0	3	2	1	280	7	104	23	150	714	0	2	1	1	22	3	0	7	2	11	3	21	0	0	0	0	18	0	0	0	10	0	0	1	2	2	0	0	1	11	7	55
c673	4	5	a	9	800	0	0	0	2	0	1	112	5	334	24	409	3070	0	1	1	5	70	0	1	39	2	0	2	29	3	2	1	0	15	0	0	2	40	0	0	1	6	2	2	0	0	9	9	35
c674	4	5	b	12.5	851	0	0	0	0	0	0	14	5	22	10	45	377	0	0	0	0	1	0	0	6	0	0	0	9	2	1	0	1	4	0	0	0	0	0	1	1	6	1	0	1	0	2	1	6
c675	4	5	c	13.5	1004	0	0	0	3	0	0	37	7	12	23	206	2853	0	0	0	16	4	0	0	0	0	0	0	8	0	0	0	0	3	0	0	1	0	0	3	0	0	3	0	0	0	24	5	12
c676	4	5	d	13.2	724	2	0	0	0	0	1	79	0	274	40	595	124	0	2	1	1	39	3	4	80	0	5	2	32	0	0	1	0	2	0	0	0	2	0	0	1	9	1	0	0	2	6	6	95
c677	4	5	e	12	1204	0	8	3	27	5	2	2284	54	276	130	2072	24935	12	2	42	35	132	0	7	76	3	19	14	528	0	10	13	4	255	0	1	6	44	1	4	0	149	40	43	16	0	292	99	941
c678	4	5	f	13	1300	0	0	0	1	0	0	23	1	14	1	24	324	0	0	0	0	5	0	0	1	0	0	0	8	0	0	0	0	3	0	0	0	9	0	0	0	0	0	0	0	0	1	2	79
c679	4	5	g	14	494	0	0	0	0	0	0	10	0	4	2	15	283	0	0	0	2	1	0	1	3	0	0	0	3	1	0	0	1	3	0	0	0	0	0	0	0	2	0	0	0	0	0	1	1
c680	4	5	h	14.5	1157	0	0	1	1	0	0	908	0	13	8	46	1501	0	0	21	0	2	0	0	1	1	0	0	58	0	0	0	0	2	0	0	0	1	0	0	0	3	1	0	0	0	18	4	30
c681	4	6	a	8	800	1	2	1	4	0	0	125	0	134	98	128	1811	0	3	0	0	43	2	0	5	1	11	2	83	0	1	0	1	19	1	0	2	200	0	1	0	1	0	4	0	0	21	12	1150
c682	4	6	b	8.5	851	0	0	0	0	0	0	5	1	4	5	16	235	0	0	1	0	0	0	0	0	0	1	0	1	0	0	0	0	1	0	0	0	0	0	0	0	0	1	0	0	0	2	2	2
c683	4	6	c	9.5	1004	0	0	0	0	0	0	9	0	4	0	9	189	0	0	1	0	1	0	0	2	0	0	0	4	1	0	0	0	3	0	0	0	2	0	0	0	0	1	0	0	0	3	0	2
c684	4	6	d	9.2	724	0	0	0	0	0	0	20	0	9	2	16	219	0	0	1	0	3	0	0	1	0	0	0	5	0	0	0	0	4	0	0	0	0	0	0	0	2	0	0	0	0	2	2	11
c685	4	6	e	8	1204	0	1	0	0	0	0	17	2	10	2	92	228	0	0	0	0	2	0	0	2	0	0	0	1	2	0	0	0	3	0	0	0	1	1	0	0	1	0	0	0	0	2	3	5
c686	4	6	f	9	1300	0	0	0	2	0	0	29	2	15	2	24	730	0	0	0	0	6	0	0	1	0	0	0	3	0	1	0	0	5	0	0	1	4	0	0	0	1	0	0	0	0	4	0	8
c687	4	6	g	10	494	0	0	0	0	0	0	0	0	0	0	1	0	0	0	0	0	0	0	0	0	0	0	0	0	0	0	0	0	0	0	0	0	0	0	0	0	0	0	0	0	0	0	0	0
c688	4	6	h	10.5	1157	0	0	0	3	0	0	21	1	4	1	17	369	0	0	0	0	0	0	0	0	0	0	0	3	1	0	0	0	5	0	0	0	0	0	0	0	3	0	0	0	0	1	1	3
c689	4	7	a	4	800	0	0	0	1	0	0	44	1	5	3	35	183	0	0	4	0	0	0	0	0	0	1	0	5	0	0	0	0	4	0	0	0	0	0	0	0	1	0	0	0	1	3	0	3
c690	4	7	b	4.5	851	0	0	0	0	0	0	0	0	0	0	0	0	0	0	0	0	0	0	0	0	0	0	0	0	0	0	0	0	0	0	0	0	0	0	0	0	0	0	0	0	0	0	0	1
c691	4	7	c	5.5	1004	0	0	0	0	0	0	0	0	0	0	0	0	0	0	0	0	0	0	0	0	0	0	0	0	0	0	0	0	0	0	0	0	0	0	0	0	0	0	0	0	0	0	0	0
c692	4	7	d	5.2	724	0	0	0	0	0	0	0	0	0	0	0	1	0	0	0	0	0	0	0	0	0	0	0	0	0	0	0	0	0	0	0	0	0	0	0	0	0	0	0	0	0	0	0	0
c693	4	7	e	4	1204	0	0	0	0	0	0	0	0	0	0	0	2	0	0	0	0	0	0	0	0	0	0	0	0	0	0	0	0	0	0	0	0	0	0	0	0	0	0	0	0	0	0	0	0
c694	4	7	f	5	1300	0	0	0	0	0	0	0	0	0	0	2	17	0	0	0	0	0	0	0	0	0	0	0	0	0	0	0	0	0	0	0	0	0	0	0	0	0	0	0	0	0	0	0	0
c695	4	7	g	6	494	0	0	0	0	0	0	0	0	0	0	2	9	0	0	0	0	0	0	0	1	0	0	0	0	0	0	0	0	0	0	0	0	0	0	0	0	0	0	0	0	0	0	0	0
c696	4	7	h	6.5	1157	0	0	0	0	0	0	0	0	0	0	0	2	0	0	0	0	0	0	0	0	0	0	0	0	0	0	0	0	0	0	0	0	0	0	0	0	0	0	0	0	0	0	0	0
c697	4	8	a	4	1600	0	0	0	0	0	0	0	0	0	0	0	0	0	0	0	0	0	0	0	0	0	0	0	0	0	0	0	0	0	0	0	0	0	0	0	0	0	0	0	0	0	0	0	0
c698	4	8	b	4.5	1651	0	0	0	0	0	0	0	0	0	0	0	0	0	0	0	0	0	0	0	0	0	0	0	0	0	0	0	0	0	0	0	0	0	0	0	0	0	0	0	0	0	0	0	0
c699	4	8	c	5.5	1804	0	0	0	0	0	0	0	0	1	0	0	0	0	0	0	0	0	0	0	0	0	0	0	0	0	0	0	0	0	0	0	0	0	0	0	0	0	0	0	0	0	0	0	1
c700	4	8	d	5.2	1524	0	0	0	0	0	0	1	0	0	0	1	0	0	0	0	0	0	0	0	0	0	0	0	0	0	0	0	0	0	0	0	0	0	0	0	0	0	0	0	0	0	0	0	0
c701	4	8	e	4	2004	0	0	0	0	0	0	0	0	0	0	0	0	0	0	0	0	0	0	0	0	0	0	0	0	0	0	0	0	0	0	0	0	0	0	0	0	0	0	0	0	0	0	0	0
c702	4	8	f	5	2100	0	0	0	0	0	0	0	0	0	0	0	3	0	0	0	0	1	0	0	0	0	0	0	0	0	0	0	0	0	0	0	0	0	0	0	0	0	0	0	0	0	0	0	0
c703	4	8	g	6	1294	0	0	0	0	0	0	1	0	0	0	1	10	0	0	0	0	0	0	0	0	0	0	0	0	0	0	0	0	0	0	0	0	0	0	0	0	0	0	0	0	0	0	0	0
c704	4	8	h	6.5	1957	0	0	0	0	0	0	0	0	0	0	1	9	0	0	0	0	0	0	0	0	0	0	0	0	0	0	0	0	0	0	0	0	0	0	0	0	0	0	0	0	0	0	0	0
c705	4	9	a	8	1600	0	0	0	0	0	0	0	0	0	0	0	4	0	0	0	0	0	0	0	0	0	0	0	0	0	0	0	0	0	0	0	0	0	0	0	0	0	0	0	0	0	0	0	0
c706	4	9	b	8.5	1651	0	0	0	0	0	0	0	0	0	0	0	0	0	0	0	0	0	0	0	0	0	0	0	0	0	0	0	0	0	0	0	0	0	0	0	0	0	0	0	0	0	0	0	0
c707	4	9	c	9.5	1804	0	0	0	0	0	0	0	0	0	0	0	0	0	0	0	0	0	0	0	0	0	0	0	0	0	0	0	0	0	0	0	0	0	0	0	0	0	0	0	0	0	0	0	0
c708	4	9	d	9.2	1524	0	0	0	0	0	0	0	0	0	0	0	6	0	0	0	0	0	0	0	1	0	0	0	0	0	0	0	0	0	0	0	0	0	0	0	0	0	0	0	0	0	1	0	0
c709	4	9	e	8	2004	0	0	0	0	0	0	1	0	0	0	0	1	0	0	0	0	0	0	0	0	0	0	0	0	0	0	0	0	0	0	0	0	0	0	0	0	0	0	0	0	0	0	0	0
c710	4	9	f	9	2100	0	0	0	0	0	0	0	0	0	0	0	2	0	0	0	0	0	0	0	0	0	0	0	0	0	0	0	0	0	0	0	0	0	0	0	0	0	0	0	0	0	0	0	1
c711	4	9	g	10	1294	0	0	0	0	0	0	0	0	0	0	0	2	0	0	0	0	0	0	0	0	0	0	0	0	0	0	0	0	0	0	0	0	0	0	0	0	0	0	0	0	0	0	0	0
c712	4	9	h	10.5	1957	0	0	0	0	0	0	0	0	0	0	0	1	0	0	0	0	0	0	0	0	0	0	0	0	0	0	0	0	0	0	0	0	0	0	0	0	0	0	0	0	0	0	0	0
c713	4	10	a	12	1600	0	0	0	0	0	0	0	0	0	0	0	1	0	0	0	0	0	0	0	0	0	0	0	0	0	0	0	0	0	0	0	0	0	0	0	0	0	0	0	0	0	0	0	0
c714	4	10	b	12.5	1651	0	0	0	0	0	0	0	0	0	0	0	4	0	0	0	0	0	0	0	0	0	0	0	0	0	0	0	0	0	0	0	0	0	0	0	0	0	0	0	0	0	0	0	0
c715	4	10	c	13.5	1804	0	3	0	55	0	6	804	156	241	205	484	88743	1	29	1	0	18	8	3	15	7	0	8	303	1	30	3	0	7	1	0	0	100	0	0	2	13	0	4	2	2	337	4	157
c716	4	10	d	13.2	1524	7	28	1	42	1	1	9811	113	1188	184	6826	64746	16	0	604	0	153	10	0	295	2	20	0	522	21	16	3	0	4	10	3	38	12	0	32	18	1030	1	65	21	30	1454	84	400
c717	4	10	e	12	2004	0	0	0	0	0	0	19	3	3	3	17	587	0	0	0	0	2	0	0	0	0	0	0	5	0	1	0	0	0	0	0	0	3	0	0	0	9	0	0	0	0	6	0	0
c718	4	10	f	13	2100	0	0	0	0	0	0	7	1	4	2	11	240	0	0	0	0	1	0	0	0	1	0	0	2	0	0	0	0	0	0	0	0	0	0	0	0	3	0	0	0	0	4	1	3
c719	4	10	g	14	1294	0	0	0	0	0	0	16	2	6	2	17	257	0	0	0	0	0	0	0	0	0	0	0	3	1	0	0	0	2	0	0	0	1	0	0	0	9	0	0	0	0	2	0	5
c720	4	10	h	14.5	1957	0	0	0	1	0	0	28	0	9	3	51	1035	0	1	1	0	2	0	0	2	0	0	0	8	0	0	0	0	1	0	0	0	1	0	1	0	7	0	0	0	0	7	1	9
c721	2	1	a	0	0	0	0	0	0	0	0	54	0	7	6	55	343	0	0	5	0	1	0	0	1	0	0	0	6	0	0	0	0	0	0	0	0	0	0	0	0	6	0	0	0	0	9	3	4
c722	2	1	b	0.5	51	0	0	0	0	0	0	2	0	0	1	2	47	0	0	0	0	1	0	0	0	0	0	1	1	0	0	0	0	1	0	0	0	0	0	0	0	0	0	0	0	0	3	0	1
c723	2	1	c	1.5	204	0	0	0	0	0	0	2	0	1	5	3	35	0	0	0	0	1	0	0	0	0	0	0	0	0	0	0	0	0	0	0	0	0	0	0	0	0	0	0	0	0	1	0	1
c724	2	1	d	1.2	-76	0	0	0	0	1	0	12	0	3	3	11	179	0	0	0	0	0	0	0	0	1	0	0	0	0	0	0	0	0	0	0	0	0	0	0	0	5	0	0	0	1	2	1	0
c725	2	1	e	0	404	0	0	0	0	0	0	2	0	1	3	4	215	0	1	0	0	0	0	0	0	0	0	0	2	0	0	0	0	0	0	0	0	0	0	0	0	0	0	0	0	0	1	0	1
c726	2	1	f	1	500	0	0	0	0	0	0	0	0	0	1	1	171	0	0	0	0	0	0	0	0	0	0	0	1	0	0	0	0	0	0	0	0	0	0	0	0	0	0	0	0	0	0	0	0
c727	2	1	g	2	-306	0	0	0	0	0	0	1	0	0	1	1	8	0	0	0	0	0	0	0	0	0	0	0	0	0	0	0	0	0	0	0	0	0	0	0	0	0	0	0	0	0	0	0	0
c728	2	1	h	2.5	357	0	0	0	0	0	0	0	0	0	0	1	1	0	0	0	0	0	0	0	0	0	0	0	0	0	0	0	0	0	0	0	0	0	0	0	0	0	0	0	0	0	0	0	0
c729	2	2	a	4	0	0	0	0	0	0	0	0	0	0	0	0	0	0	0	0	0	0	0	0	0	0	0	0	0	0	0	0	0	0	0	0	0	0	0	0	0	0	0	0	0	0	0	0	0
c730	2	2	b	4.5	51	0	0	0	0	0	0	0	0	0	0	0	0	0	0	0	0	0	0	0	0	0	0	0	0	0	0	0	0	0	0	0	0	0	0	0	0	0	0	0	0	0	0	0	0
c731	2	2	c	5.5	204	0	0	0	0	0	0	0	0	0	0	0	1	0	0	0	0	0	0	0	0	0	0	0	0	0	0	0	0	0	0	0	0	0	0	0	0	0	0	0	0	0	0	0	0
c732	2	2	d	5.2	-76	0	0	0	0	0	0	2	0	0	0	2	12	0	0	0	0	0	0	0	0	0	0	0	1	0	0	0	0	0	0	0	0	0	0	0	0	0	0	0	0	0	0	0	0
c733	2	2	e	4	404	0	0	0	0	0	0	0	0	0	0	0	14	0	0	0	0	0	0	0	0	0	0	0	0	0	0	0	0	0	0	0	0	0	0	0	0	0	0	0	0	0	0	0	1
c734	2	2	f	5	500	0	0	0	0	0	0	0	0	0	0	0	14	0	0	0	0	0	0	0	0	0	0	0	0	0	0	0	0	0	0	0	0	0	0	0	0	0	0	0	0	0	0	0	0
c735	2	2	g	6	-306	0	0	0	0	0	0	0	0	0	0	0	14	0	0	0	0	0	0	0	0	0	0	0	0	0	0	0	0	0	0	0	0	0	0	0	0	0	0	0	0	0	0	0	0
c736	2	2	h	6.5	357	0	0	0	0	0	0	1	0	0	0	0	0	0	0	0	0	0	0	0	0	0	0	0	0	0	0	0	0	0	0	0	0	0	0	0	0	0	0	0	0	0	0	0	0
c737	2	3	a	8	0	0	0	0	0	0	0	0	0	0	0	0	0	0	0	0	0	0	0	0	0	0	0	0	0	0	0	0	0	0	0	0	0	0	0	0	0	0	0	0	0	0	0	0	0
c738	2	3	b	8.5	51	0	0	0	0	0	0	0	0	0	0	0	0	0	0	0	0	0	0	0	0	0	0	0	0	0	0	0	0	0	0	0	0	0	0	0	0	0	0	0	0	0	0	0	0
c739	2	3	c	9.5	204	0	0	0	0	0	0	0	0	0	0	1	1	0	0	0	0	0	0	0	0	0	0	0	0	0	0	0	0	0	0	0	0	0	0	0	0	0	0	0	0	0	0	0	0
c740	2	3	d	9.2	-76	0	0	0	0	0	0	0	0	0	0	1	25	0	0	0	0	0	0	0	0	0	0	0	1	0	0	0	0	0	0	0	0	0	0	0	0	0	0	0	0	0	0	0	2
c741	2	3	e	8	404	0	0	0	0	0	0	0	0	0	0	0	2	0	0	0	0	0	0	0	0	0	0	0	0	0	0	0	0	0	0	0	0	0	0	0	0	0	0	0	0	0	0	0	0
c742	2	3	f	9	500	0	0	0	0	0	0	0	0	0	0	0	11	0	0	0	0	0	0	0	0	0	0	0	0	0	0	0	0	0	0	0	0	0	0	0	0	0	0	0	0	0	0	0	0
c743	2	3	g	10	-306	0	0	0	0	0	0	0	0	0	0	0	0	0	0	0	0	0	0	0	0	0	0	0	0	0	0	0	0	0	0	0	0	0	0	0	0	0	0	0	0	0	0	0	0
c744	2	3	h	10.5	357	0	0	0	0	0	0	0	0	0	0	0	4	0	0	0	0	0	0	0	0	0	0	0	0	0	0	0	0	0	0	0	0	0	0	0	0	0	0	0	0	0	0	0	1
c745	2	4	a	12	0	3	3	1	22	3	3	366	53	1819	57	700	24034	2	4	0	4	170	0	2	61	8	0	8	564	18	33	5	4	17	1	1	1	20	0	1	2	22	1	3	1	1	205	8	141
c746	2	4	b	12.5	51	0	0	0	3	0	0	76	6	291	27	1970	2635	0	0	10	1	23	2	1	40	1	0	1	35	0	11	1	0	14	0	1	0	0	0	0	1	3	2	0	0	1	53	50	28
c747	2	4	c	13.5	204	0	3	0	3	0	0	173	7	109	34	240	3080	0	4	3	1	26	0	0	52	0	0	1	60	1	10	0	0	8	2	0	0	17	0	2	1	13	2	0	1	1	18	3	80
c748	2	4	d	13.2	-76	4	8	0	8	0	5	372	10	197	158	461	5611	0	7	26	0	29	0	8	127	2	0	5	66	1	19	0	1	1	0	0	4	2	1	2	1	162	0	2	9	0	40	39	65
c749	2	4	e	12	404	0	0	0	3	1	0	29	2	9	17	66	949	0	0	1	3	1	1	0	4	0	0	0	10	1	8	0	0	2	0	0	0	8	0	0	0	4	0	0	0	0	13	0	18
c750	2	4	f	13	500	0	0	0	3	0	0	87	6	20	12	62	3694	0	0	1	0	4	0	0	2	1	0	4	9	1	10	0	1	3	0	0	0	2	0	0	0	11	0	0	0	0	20	5	20
c751	2	4	g	14	-306	0	0	0	0	0	0	3	0	0	0	0	74	0	0	0	0	0	0	0	0	0	0	0	0	0	1	0	0	0	0	0	0	0	0	0	0	0	0	0	0	0	0	0	0
c752	2	4	h	14.5	357	0	0	0	2	1	0	66	0	22	6	73	1899	0	0	3	0	2	0	0	4	0	0	1	19	0	7	0	0	5	0	0	2	2	0	0	0	6	0	0	1	2	19	5	47
c753	2	5	a	9	800	0	0	0	3	1	0	54	4	32	1	67	1550	0	0	0	1	6	0	0	2	0	0	0	14	0	2	0	0	5	0	0	0	5	0	0	0	3	1	0	1	0	8	3	54
c754	2	5	b	12.5	851	0	0	0	3	1	0	71	9	156	12	101	3948	0	0	1	0	16	0	0	10	0	1	4	35	2	12	1	0	4	0	0	0	2	0	0	0	9	1	1	1	0	26	3	25
c755	2	5	c	13.5	1004	0	1	0	9	0	0	196	8	42	18	146	6215	0	1	1	2	3	1	0	7	0	1	3	35	1	16	0	1	16	0	0	0	4	0	0	1	110	1	1	0	0	33	8	38
c756	2	5	d	13.2	724	0	0	0	8	0	0	144	11	52	15	122	4798	0	0	0	0	2	0	0	9	0	0	7	18	2	22	0	0	4	2	1	0	5	0	0	0	23	0	0	0	1	38	4	37
c757	2	5	e	12	1204	2	0	2	18	1	0	164	20	139	16	171	11207	1	1	2	1	18	0	1	10	1	0	16	52	9	59	2	0	4	0	0	0	4	0	0	1	12	1	2	0	0	63	6	37
c758	2	5	f	13	1300	0	0	1	6	0	1	164	7	139	17	183	5675	1	2	2	0	16	0	1	16	0	0	1	136	6	20	0	5	3	0	0	0	98	0	0	0	7	3	0	0	1	51	3	40
c759	2	5	g	14	494	0	4	1	98	2	3	556	111	47	149	403	76430	1	1	2	8	40	0	1	8	4	0	41	135	12	132	5	0	9	0	0	0	9	0	3	2	45	6	1	1	0	277	7	99
c760	2	5	h	14.5	1157	0	1	2	3	1	0	904	4	30	11	137	3217	0	1	38	0	4	0	0	4	0	0	2	129	1	7	0	0	4	0	0	0	3	0	0	0	12	2	0	1	0	27	6	33
c761	2	6	a	8	800	2	0	1	36	1	0	2876	31	50	55	247	22592	0	0	56	2	11	0	1	12	2	0	10	155	3	52	2	0	6	0	0	0	5	0	2	0	13	8	0	0	0	151	15	76
c762	2	6	b	8.5	851	0	25	0	33	2	0	1658	66	208	88	767	25051	24	1	14	9	98	3	7	58	12	5	15	369	1	28	6	0	196	0	1	3	128	0	4	1	95	21	11	3	1	248	61	739
c763	2	6	c	9.5	1004	0	0	0	0	0	0	6	0	4	2	8	201	0	0	0	0	0	0	0	0	0	0	1	2	1	0	0	0	0	0	0	0	0	0	0	0	4	0	0	0	0	2	0	3
c764	2	6	d	9.2	724	0	3	1	7	0	1	314	10	287	30	333	11327	1	2	1	1	42	1	3	22	1	1	8	302	7	33	1	3	3	0	0	1	235	0	0	1	13	6	5	0	0	78	5	96
c765	2	6	e	8	1204	0	0	0	0	0	0	0	0	0	0	0	0	0	0	0	0	0	0	0	0	0	0	0	0	0	0	0	0	0	0	0	0	0	0	0	0	0	0	0	0	0	0	0	0
c766	2	6	f	9	1300	0	2	1	3	0	0	50	1	18	4	41	1263	0	0	0	0	8	0	0	4	0	0	4	17	1	3	0	0	3	0	0	0	2	0	0	0	3	0	1	0	0	13	3	20
c767	2	6	g	10	494	1	1	0	3	0	1	137	8	161	9	395	6017	0	2	2	0	63	0	0	9	0	6	4	26	1	17	0	0	3	0	0	0	9	0	0	0	8	1	0	0	0	34	14	47
c768	2	6	h	10.5	1157	0	0	0	30	1	0	191	30	24	24	87	21197	0	0	1	1	6	0	0	4	3	0	12	29	3	71	0	0	0	1	0	2	4	0	0	0	10	0	1	1	0	94	3	45
c769	2	7	a	4	800	3	1	0	3	0	2	143	2	377	47	479	1328	1	4	3	0	41	2	2	84	1	9	0	44	0	9	2	2	2	0	0	0	3	1	1	1	8	0	0	1	2	16	22	82
c770	2	7	b	4.5	851	1	0	0	3	0	0	39	3	112	4	49	1147	0	0	1	1	16	0	1	5	0	0	1	13	2	1	0	0	2	0	0	1	2	0	0	0	3	1	1	2	0	12	4	21
c771	2	7	c	5.5	1004	0	0	1	0	0	0	68	4	46	26	53	1847	0	0	0	0	14	0	0	6	0	2	1	8	3	9	0	1	2	0	0	0	4	1	0	0	3	1	0	0	0	11	1	13
c772	2	7	d	5.2	724	2	1	0	4	0	0	43	1	31	6	48	1332	1	0	1	0	11	0	0	4	0	1	2	13	0	6	0	0	4	0	0	0	2	0	0	0	4	1	0	0	1	8	3	15
c773	2	7	e	4	1204	2	4	0	3	1	0	274	4	50	42	444	2226	0	7	11	0	18	1	2	49	1	0	4	62	14	2	0	0	3	0	2	0	6	0	0	0	17	1	1	0	1	36	18	252
c774	2	7	f	5	1300	5	5	7	2	0	2	265	4	378	55	261	3105	0	3	4	1	172	11	0	17	2	26	3	169	2	9	0	1	40	2	0	0	621	0	6	0	5	1	4	1	0	48	32	3046
c775	2	7	g	6	494	2	0	10	20	1	3	204	9	265	30	1919	4824	0	1	9	1	19	2	0	38	0	0	4	175	0	5	8	0	20	0	6	0	3	0	2	0	18	1	1	0	0	1728	56	39
c776	2	7	h	6.5	1157	4	2	1	19	2	20	583	21	488	440	1117	14166	3	18	17	1	73	3	10	325	1	0	1	184	6	12	2	1	19	0	0	5	4	5	3	11	200	0	2	18	3	110	83	170
c777	2	8	a	4	1600	0	0	0	5	0	0	76	3	15	9	46	3634	0	0	1	0	9	0	0	3	2	1	4	11	1	16	0	0	3	0	0	0	5	0	0	0	7	0	1	0	0	16	2	26
c778	2	8	b	4.5	1651	0	0	0	3	0	0	33	2	20	7	31	1396	0	0	1	1	2	0	0	2	0	1	3	10	0	3	0	0	1	0	0	0	2	1	0	0	8	1	0	1	0	11	0	17
c779	2	8	c	5.5	1804	0	0	0	1	0	0	25	5	18	6	37	704	0	0	1	0	1	0	0	4	0	0	2	37	1	0	0	1	5	0	0	0	2	0	0	0	2	0	0	0	0	13	2	12
c780	2	8	d	5.2	1524	2	2	1	3	0	0	54	3	25	8	130	1551	0	0	0	8	2	0	0	3	1	1	1	15	0	2	0	0	2	1	0	1	6	0	0	1	2	4	1	1	0	9	3	17
c781	2	8	e	4	2004	0	0	0	1	0	0	52	1	28	3	43	1292	0	1	3	0	11	0	1	2	0	0	2	11	1	1	0	1	0	0	0	0	5	0	0	0	8	1	0	0	1	14	4	38
c782	2	8	f	5	2100	0	1	0	6	1	0	97	6	46	10	94	5360	0	0	4	4	10	0	0	7	2	0	4	22	1	25	1	0	2	0	0	0	3	0	0	0	7	1	0	0	1	21	1	10
c783	2	8	g	6	1294	0	3	44	2	0	0	105	3	46	11	84	1298	0	0	3	0	11	0	0	6	12	1	1	54	0	6	1	1	4	0	0	0	8	0	0	3	1	1	0	0	0	13	6	25
c784	2	8	h	6.5	1957	0	0	0	0	0	0	52	3	24	7	102	1248	0	0	5	0	10	0	0	10	1	0	2	15	2	2	0	0	2	0	0	0	6	0	0	2	3	0	0	0	0	18	2	23
c785	2	9	a	8	1600	0	0	0	2	0	0	132	3	27	10	54	1114	0	0	1	0	9	0	0	7	0	0	9	12	0	0	0	0	1	0	1	0	23	0	0	0	4	0	1	0	0	16	0	20
c786	2	9	b	8.5	1651	0	0	0	0	0	0	5	0	1	0	2	87	0	0	0	0	0	0	0	0	0	0	0	0	0	0	0	0	1	0	0	0	0	0	0	0	0	0	0	0	0	1	0	0
c787	2	9	c	9.5	1804	0	0	0	2	0	0	18	0	5	5	13	505	0	0	0	0	1	0	0	5	0	0	1	3	0	0	0	0	4	0	0	0	0	0	0	0	11	0	0	0	0	3	1	2
c788	2	9	d	9.2	1524	0	0	0	25	0	1	503	26	62	49	224	19185	1	1	4	0	19	0	0	22	1	1	9	57	2	39	0	0	140	0	0	2	11	0	0	0	185	1	2	1	0	86	7	50
c789	2	9	e	8	2004	7	1	0	2	0	0	156	1	43	43	188	306	0	0	0	2	16	0	1	3	22	0	18	92	0	0	1	20	14	0	0	26	0	0	2	1	14	0	0	0	0	5	35	103
c790	2	9	f	9	2100	0	4	1	138	0	0	234	8	12	20	631	14722	0	0	0	0	3	0	0	2	0	0	7	40	1	0	1	0	8	0	0	0	0	0	0	0	16	0	0	0	0	92	3	51
c791	2	9	g	10	1294	0	0	0	2	0	0	1	0	1	0	5	83	0	0	0	0	1	0	0	0	0	0	0	2	0	0	0	0	0	0	0	0	0	0	0	0	0	0	0	0	0	1	0	1
c792	2	9	h	10.5	1957	0	0	0	0	0	0	0	0	0	0	0	0	0	0	0	0	0	0	0	0	0	0	0	0	0	0	0	0	0	0	0	0	0	0	0	0	0	0	0	0	0	0	0	0
c793	2	10	a	12	1600	1	0	0	1	0	0	0	0	1	1	3	49	0	0	0	0	0	0	0	1	0	0	0	1	0	0	0	0	0	0	0	0	0	0	0	0	0	0	0	0	0	0	0	1
c794	2	10	b	12.5	1651	0	0	0	0	0	0	78	0	0	0	9	53	0	0	0	0	5	1	0	0	0	0	2	2	0	0	0	0	0	0	0	0	0	0	0	0	1	0	0	0	0	1	1	58
c795	2	10	c	13.5	1804	0	0	0	1	0	0	4	0	0	0	7	32	0	0	0	0	0	0	0	0	0	0	0	1	0	0	0	0	0	0	0	0	0	0	0	0	0	0	0	0	0	1	0	2
c796	2	10	d	13.2	1524	0	0	0	0	0	0	0	0	0	0	0	0	0	0	0	0	0	0	0	0	0	0	0	0	0	0	0	0	0	0	0	0	0	0	0	0	0	0	0	0	0	0	0	0
c797	2	10	e	12	2004	0	0	0	0	0	0	2	0	1	0	5	54	0	0	0	0	0	0	0	0	0	0	0	1	0	0	0	0	0	0	0	0	0	0	0	0	0	0	0	0	0	0	1	0
c798	2	10	f	13	2100	0	0	0	1	0	0	6	0	6	1	7	63	0	0	0	0	1	0	0	0	0	0	0	1	0	0	0	0	0	0	0	1	0	0	0	0	0	0	0	0	0	1	0	2
c799	2	10	g	14	1294	0	1	0	0	0	0	5	0	2	1	11	114	0	0	0	0	0	0	0	0	0	0	0	0	0	0	0	0	0	0	0	0	0	0	0	0	0	0	0	0	0	1	0	0
c800	2	10	h	14.5	1957	0	0	1	1	0	0	18	0	3	3	9	172	0	0	0	0	3	0	1	1	0	0	0	5	0	0	0	0	0	0	0	0	0	0	0	0	2	4	0	0	0	10	1	1
c801	10	1	a	0	0	0	10	0	7	0	0	15	0	134	5	581	384	0	0	0	9	0	0	0	0	0	0	0	2	0	0	0	0	0	0	0	3	1	0	3	0	10	3	0	0	0	5	11	5
c802	10	1	b	0.5	51	0	0	0	2	0	0	6	0	0	0	21	197	0	0	0	0	2	0	0	2	0	0	0	1	0	0	0	0	0	0	0	0	0	0	4	0	0	1	0	0	0	1	0	2
c803	10	1	c	1.5	204	0	0	0	1	0	0	30	0	6	2	32	191	0	1	1	0	0	0	0	0	0	0	3	5	0	0	0	0	0	0	0	0	0	0	0	0	2	1	0	0	0	9	0	3
c804	10	1	d	1.2	-76	0	0	0	0	0	0	17	0	33	8	35	142	0	0	0	1	7	0	1	2	0	0	4	23	0	0	0	2	9	0	0	3	0	0	1	0	1	0	0	2	0	23	12	10
c805	10	1	e	0	404	0	0	0	1	0	0	18	0	19	3	27	206	0	0	1	0	1	0	0	7	0	0	0	32	2	0	0	0	1	0	0	0	1	0	0	0	1	0	0	0	0	1	2	3
c806	10	1	f	1	500	0	0	0	2	0	0	1	0	16	6	73	58	0	0	0	0	42	0	1	6	1	0	0	23	0	0	0	0	1	0	0	0	0	0	1	0	0	0	0	0	0	2	3	2
c807	10	1	g	2	-306	0	0	1	0	0	0	18	1	5	1	17	148	0	0	0	0	4	0	0	0	6	0	0	8	0	0	0	0	0	0	0	0	0	2	0	0	0	0	0	0	0	0	2	3
c808	10	1	h	2.5	357	1	0	0	2	0	1	20	0	128	3	34	261	0	0	0	0	12	0	0	0	1	0	0	15	1	0	0	0	0	0	0	0	2	0	0	0	2	0	0	1	0	8	1	35
c809	10	2	a	4	0	5	1	0	14	1	0	346	6	63	66	301	2394	0	1	6	0	37	14	0	16	1	0	10	112	0	0	0	2	13	0	3	5	2	0	11	1	63	0	0	0	0	17	19	77
c810	10	2	b	4.5	51	0	11	0	62	0	1	176	9	102	34	552	11469	0	1	0	2	32	1	0	19	0	0	3	107	2	2	2	0	3	0	0	1	5	0	0	2	9	1	0	4	0	63	12	41
c811	10	2	c	5.5	204	0	6	0	80	0	1	348	23	51	153	719	11645	3	0	0	3	99	1	2	7	4	0	12	154	1	4	5	4	16	0	4	6	10	0	4	0	30	8	6	0	0	104	40	170
c812	10	2	d	5.2	-76	0	0	0	0	0	0	1	0	0	0	0	3	0	0	0	0	0	0	0	0	0	0	0	0	0	0	0	0	0	0	0	0	0	0	0	0	0	0	0	0	0	0	0	0
c813	10	2	e	4	404	0	0	0	0	0	0	1	1	1	0	2	24	0	0	0	0	0	0	0	0	1	0	0	1	0	0	0	0	0	0	0	0	0	0	0	0	1	0	0	0	0	0	0	0
c814	10	2	f	5	500	0	0	0	1	0	0	4	0	5	0	8	53	0	0	0	0	0	0	0	0	0	0	0	1	0	0	0	0	0	0	0	0	0	0	0	0	0	0	0	0	0	0	1	1
c815	10	2	g	6	-306	0	0	0	3	0	0	15	0	1	10	24	396	0	0	0	1	2	0	1	0	0	0	0	8	0	0	0	0	0	0	0	0	2	0	0	0	1	0	0	0	0	3	1	4
c816	10	2	h	6.5	357	0	0	0	0	0	0	5	0	6	1	10	49	0	0	0	0	0	0	0	1	0	0	0	1	0	0	0	0	0	0	0	0	0	0	0	0	0	0	0	0	0	0	0	0
c817	10	3	a	8	0	0	0	0	1	0	0	7	0	17	4	17	111	0	0	0	0	7	1	1	0	0	0	1	4	0	0	1	0	0	0	0	0	0	0	2	0	0	2	0	0	0	0	1	3
c818	10	3	b	8.5	51	0	1	0	3	0	0	11	0	12	1	15	177	0	0	0	0	1	0	0	0	0	0	0	4	0	0	0	0	0	0	0	0	0	0	0	0	2	0	0	0	0	0	1	2
c819	10	3	c	9.5	204	0	0	0	1	0	0	0	0	4	2	14	42	0	0	0	0	0	0	0	0	0	0	0	1	0	0	0	0	1	0	0	0	0	0	0	0	1	0	0	0	0	0	0	2
c820	10	3	d	9.2	-76	0	0	0	10	0	0	35	2	3	7	46	1396	0	0	0	0	0	0	0	1	0	2	0	6	0	0	0	0	0	0	0	0	3	0	0	0	0	0	0	0	0	10	1	6
c821	10	3	e	8	404	0	0	0	0	0	0	3	0	0	3	1	34	0	0	0	0	1	0	0	0	0	0	0	2	0	0	0	0	0	0	0	0	0	0	0	0	1	0	0	0	0	1	0	5
c822	10	3	f	9	500	0	0	0	1	0	0	2	1	7	0	6	45	0	0	0	0	0	0	0	0	0	0	0	1	0	0	0	0	0	0	0	1	0	0	0	0	0	0	0	0	0	0	0	2
c823	10	3	g	10	-306	0	0	0	0	0	0	0	0	0	0	0	0	0	0	0	0	0	0	0	0	0	0	0	0	0	0	0	0	0	0	0	0	0	0	0	0	0	0	0	0	0	0	0	0
c824	10	3	h	10.5	357	0	0	0	1	0	0	0	0	0	0	5	41	0	0	0	0	1	0	0	1	0	0	0	1	0	0	0	0	0	0	0	1	0	0	0	0	0	1	0	0	0	1	0	3
c825	10	4	a	12	0	0	0	2	9	0	0	179	0	2	10	167	1551	0	0	0	0	2	0	0	0	0	0	0	40	0	0	0	0	0	0	1	0	0	0	3	0	0	0	0	0	0	19	3	20
c826	10	4	b	12.5	51	0	2	0	0	0	0	3	0	0	2	10	55	0	0	0	0	1	0	0	0	0	0	0	1	0	0	0	0	0	0	0	1	0	0	0	0	0	0	0	0	0	0	1	3
c827	10	4	c	13.5	204	0	0	0	0	0	0	3	0	1	0	4	33	0	0	0	0	0	0	0	0	0	0	0	0	0	0	0	0	0	0	0	0	0	0	0	0	0	0	0	0	0	0	1	1
c828	10	4	d	13.2	-76	1	0	0	0	0	0	34	0	164	33	226	75	0	0	0	3	25	0	3	18	13	0	4	78	0	0	19	0	0	0	0	0	0	0	55	0	2	0	0	0	0	3	2	55
c829	10	4	e	12	404	0	1	0	1	0	0	7	1	2	2	11	308	0	0	0	0	1	0	1	2	0	0	0	5	0	0	0	0	0	0	0	0	0	0	0	0	0	0	0	0	0	2	0	2
c830	10	4	f	13	500	0	0	0	1	0	0	6	1	5	2	14	189	0	0	0	0	2	0	0	1	0	0	0	4	0	0	0	0	1	0	0	0	0	0	0	0	1	0	0	0	0	0	0	0
c831	10	4	g	14	-306	0	0	0	0	0	0	8	1	5	3	25	118	0	0	1	0	0	2	0	0	0	0	1	0	0	0	0	0	1	0	0	0	0	0	1	0	0	0	0	0	0	0	0	4
c832	10	4	h	14.5	357	0	0	0	0	0	0	75	0	4	0	9	36	0	0	0	0	8	0	0	5	0	0	1	3	0	0	0	1	1	0	0	0	0	1	0	0	1	0	0	0	0	1	1	93
c833	10	5	a	9	800	0	1	0	1	0	0	10	0	8	2	154	176	0	0	0	0	1	0	0	1	1	0	0	27	0	0	0	0	1	0	0	0	0	0	0	0	1	0	0	0	0	2	18	16
c834	10	5	b	12.5	851	0	4	1	21	0	0	59	4	48	16	164	3274	0	0	0	2	12	1	2	2	1	0	2	26	1	0	0	1	1	0	0	0	3	0	0	0	2	0	0	0	0	19	4	11
c835	10	5	c	13.5	1004	0	0	0	0	0	0	0	0	0	0	0	3	0	0	0	0	0	0	0	0	0	0	0	1	0	0	0	0	0	0	0	0	0	0	0	0	0	0	0	0	0	0	0	0
c836	10	5	d	13.2	724	0	0	0	0	0	0	7	0	5	0	12	187	0	0	0	0	0	0	0	0	0	0	0	4	1	0	0	0	0	0	0	0	3	0	0	0	1	0	0	0	0	0	0	0
c837	10	5	e	12	1204	0	0	0	0	0	0	0	0	0	0	0	1	0	0	0	0	0	0	0	0	0	0	0	0	0	0	0	0	0	0	0	0	0	0	0	0	0	0	0	0	0	0	0	0
c838	10	5	f	13	1300	0	0	0	0	0	0	0	0	0	0	0	1	0	0	0	0	0	0	0	0	0	0	0	0	0	0	0	0	0	0	0	0	0	0	0	0	0	0	0	0	0	0	0	0
c839	10	5	g	14	494	0	0	0	0	0	0	1	0	0	0	0	0	0	0	0	0	0	0	0	0	0	0	0	0	0	0	0	0	0	0	0	0	0	0	0	0	0	0	0	0	0	0	0	0
c840	10	5	h	14.5	1157	0	0	0	0	0	0	0	0	1	0	0	1	0	0	0	0	0	0	0	0	0	0	0	0	0	0	0	0	0	0	0	0	0	0	0	0	0	0	0	0	0	0	0	0
c841	10	6	a	8	800	0	0	0	0	0	0	0	0	0	0	0	10	0	0	0	0	0	0	0	0	0	0	0	0	0	0	0	0	0	0	0	0	0	0	0	0	0	0	0	0	0	0	0	0
c842	10	6	b	8.5	851	0	0	0	0	0	0	0	0	2	0	0	2	0	0	0	0	0	0	0	0	0	0	0	1	0	0	0	0	0	0	0	0	0	0	0	0	0	0	0	0	0	0	0	0
c843	10	6	c	9.5	1004	0	0	0	0	0	0	0	0	0	0	0	4	0	0	0	0	0	0	0	0	0	0	0	0	0	0	0	0	0	0	0	0	0	0	0	0	0	0	0	0	0	0	0	0
c844	10	6	d	9.2	724	0	0	0	0	0	0	0	0	0	0	0	0	0	0	0	0	0	0	0	0	0	0	0	0	0	0	0	0	0	0	0	0	0	0	0	0	0	0	0	0	0	0	0	0
c845	10	6	e	8	1204	0	0	0	0	0	0	0	0	0	0	0	0	0	0	0	0	0	0	0	0	0	0	0	0	0	0	0	0	0	0	0	0	0	0	0	0	0	0	0	0	0	0	0	0
c846	10	6	f	9	1300	0	0	0	0	0	0	0	0	0	0	0	0	0	0	0	0	0	0	0	0	0	0	0	0	0	0	0	0	0	0	0	0	0	0	0	0	0	0	0	0	0	0	0	0
c847	10	6	g	10	494	0	0	0	0	0	0	0	0	0	0	1	0	0	0	0	0	0	0	0	0	0	0	0	0	0	0	0	0	0	0	0	0	0	0	0	0	0	0	0	0	0	0	0	0
c848	10	6	h	10.5	1157	0	0	0	0	0	0	0	0	1	0	0	1	0	0	0	0	0	0	0	0	0	0	0	0	0	0	0	0	0	0	0	0	0	0	0	0	0	0	0	0	0	0	0	0
c849	10	7	a	4	800	0	0	0	0	0	0	0	0	0	0	0	0	0	0	0	0	0	0	0	0	0	0	0	0	0	0	0	0	0	0	0	0	0	0	0	0	0	0	0	0	0	0	0	0
c850	10	7	b	4.5	851	0	0	0	1	0	0	0	0	0	0	0	1	0	0	0	0	0	0	0	0	0	0	0	0	0	0	0	0	0	0	0	0	0	0	0	0	0	0	0	0	0	0	0	0
c851	10	7	c	5.5	1004	0	0	0	0	0	0	0	0	1	0	0	2	0	0	0	0	0	0	0	0	0	0	0	0	0	0	0	0	0	0	0	0	0	0	0	0	0	0	0	0	0	0	0	0
c852	10	7	d	5.2	724	0	0	0	0	0	0	0	0	1	0	1	1	0	0	0	0	0	0	0	0	0	0	0	0	0	0	0	0	0	0	0	0	0	0	0	0	0	0	0	0	0	0	0	0
c853	10	7	e	4	1204	0	0	0	0	0	0	0	0	0	0	0	0	0	0	0	0	0	0	0	0	0	0	0	0	0	0	0	0	0	0	0	0	0	0	0	0	0	0	0	0	0	0	0	0
c854	10	7	f	5	1300	0	0	0	0	0	0	0	0	0	0	0	0	0	0	0	0	0	0	0	0	0	0	0	0	0	0	0	0	0	0	0	0	0	0	0	0	0	0	0	0	0	0	0	0
c855	10	7	g	6	494	0	0	0	0	0	0	0	0	0	0	0	5	0	0	0	0	0	0	0	0	0	0	0	1	0	0	0	0	0	0	0	0	0	0	0	0	0	0	0	0	0	0	0	0
c856	10	7	h	6.5	1157	0	0	0	0	0	0	0	0	0	0	0	0	0	0	0	0	0	0	0	0	0	0	0	0	0	0	0	0	0	0	0	0	0	0	0	0	0	0	0	0	0	0	0	0
c857	10	8	a	4	1600	0	0	0	0	0	0	0	0	0	0	0	2	0	0	0	0	0	0	0	0	0	0	0	0	0	0	0	0	0	0	0	0	0	0	0	0	0	0	0	0	0	0	0	0
c858	10	8	b	4.5	1651	0	0	0	0	0	0	0	0	0	0	0	0	0	0	0	0	0	0	0	0	0	0	0	0	0	0	0	0	0	0	0	0	0	0	0	0	0	0	0	0	0	0	0	0
c859	10	8	c	5.5	1804	0	0	0	0	0	0	0	0	0	0	1	4	0	0	0	0	0	0	0	0	0	0	0	0	0	0	0	0	0	0	0	0	0	0	0	0	0	0	0	0	0	0	0	0
c860	10	8	d	5.2	1524	0	0	0	0	0	0	0	0	0	0	0	0	0	0	0	0	0	0	0	0	0	0	0	0	0	0	0	0	0	0	0	0	0	0	0	0	0	0	0	0	0	0	0	0
c861	10	8	e	4	2004	0	0	0	0	0	0	0	0	0	0	0	0	0	0	0	0	0	0	0	0	0	0	0	0	0	0	0	0	0	0	0	0	0	0	0	0	0	0	0	0	0	0	0	0
c862	10	8	f	5	2100	0	0	0	0	0	0	0	0	0	0	0	1	0	0	0	0	0	0	0	0	0	0	0	0	0	0	0	0	0	0	0	0	0	0	0	0	0	0	0	0	0	0	0	0
c863	10	8	g	6	1294	0	0	0	0	0	0	0	0	0	0	0	0	0	0	0	0	0	0	0	0	0	0	0	0	0	0	0	0	0	0	0	0	0	0	0	0	0	0	0	0	0	0	0	0
c864	10	8	h	6.5	1957	0	0	0	0	0	0	0	0	0	0	1	0	0	0	0	0	0	0	0	0	0	0	0	0	0	0	0	0	0	0	0	0	0	0	0	0	0	0	0	0	0	0	0	0
c865	10	9	a	8	1600	0	0	0	0	0	0	0	0	0	0	0	0	0	0	0	0	0	0	0	0	0	0	0	0	0	0	0	0	0	0	0	0	0	0	0	0	0	0	0	0	0	0	0	0
c866	10	9	b	8.5	1651	0	0	0	0	0	0	0	0	0	0	0	0	0	0	0	0	0	0	0	0	0	0	0	0	0	0	0	0	0	0	0	0	0	0	0	0	0	0	0	0	0	0	0	0
c867	10	9	c	9.5	1804	0	0	0	0	0	0	0	0	0	0	0	1	0	0	0	0	0	0	0	0	0	0	0	0	0	0	0	0	0	0	0	0	0	0	0	0	0	0	0	0	0	0	0	0
c868	10	9	d	9.2	1524	0	0	0	1	0	0	0	0	0	0	0	2	0	0	0	0	0	0	0	0	0	0	0	0	0	0	0	0	0	0	0	0	0	0	0	0	0	0	0	0	0	0	0	0
c869	10	9	e	8	2004	0	0	0	0	0	0	0	0	0	0	0	0	0	0	0	0	0	0	0	0	0	0	0	0	0	0	0	0	0	0	0	0	0	0	0	0	0	0	0	0	0	0	0	0
c870	10	9	f	9	2100	0	0	0	0	0	0	0	0	0	0	0	6	0	0	0	0	0	0	0	0	0	0	0	0	0	0	0	0	0	0	0	0	0	0	0	0	0	0	0	0	0	0	0	0
c871	10	9	g	10	1294	0	0	0	0	0	0	0	0	0	0	0	5	0	0	0	0	0	0	0	0	0	0	0	0	0	0	0	0	0	0	0	0	0	0	0	0	0	0	0	0	0	0	0	0
c872	10	9	h	10.5	1957	0	0	0	0	0	0	0	0	0	0	0	3	0	0	0	0	0	0	0	0	0	0	0	0	0	0	0	0	0	0	0	0	0	0	0	0	0	0	0	0	0	0	0	0
c873	10	10	a	12	1600	0	0	0	0	0	0	0	0	0	0	0	1	0	0	0	0	0	0	0	0	0	0	0	0	0	0	0	0	0	0	0	0	0	0	0	0	0	0	0	0	0	0	0	0
c874	10	10	b	12.5	1651	0	0	0	0	0	0	0	0	0	0	0	0	0	0	0	0	0	0	0	0	0	0	0	0	0	0	0	0	0	0	0	0	0	0	0	0	0	0	0	0	0	0	0	0
c875	10	10	c	13.5	1804	0	0	0	0	0	0	0	0	2	0	2	7	0	0	0	0	0	0	0	0	0	0	0	0	0	0	0	0	0	0	0	0	0	0	0	0	0	0	0	0	0	0	0	0
c876	10	10	d	13.2	1524	0	0	0	0	0	0	0	0	0	0	0	1	0	0	0	0	0	0	0	0	0	0	0	0	0	0	0	0	0	0	0	0	0	0	0	0	0	0	0	0	0	0	0	0
c877	10	10	e	12	2004	0	0	0	0	0	0	0	0	0	0	0	0	0	0	0	0	0	0	0	0	0	0	0	0	0	0	0	0	0	0	0	0	0	0	0	0	0	0	0	0	0	0	0	0
c878	10	10	f	13	2100	0	0	0	0	0	0	0	0	0	0	0	0	0	0	0	0	0	0	0	0	0	0	0	0	0	0	0	0	0	0	0	0	0	0	0	0	0	0	0	0	0	0	0	0
c879	10	10	g	14	1294	8	1	0	5	52	5	2269	9	449	89	4719	7161	5	10	124	1	21	3	0	31	1	7	2	188	2	7	0	1	177	3	0	4	8	3	0	16	349	3	0	5	2	136	46	446
c880	10	10	h	14.5	1957	7	1	1	20	109	0	3061	20	713	87	7499	8773	5	10	248	0	23	4	0	16	1	8	4	217	5	11	0	0	175	3	0	4	7	3	5	4	482	1	0	10	8	196	62	560
[truncated: 77 more columns]

## Sheet: site-level properties
site	tree_mortality	root_biomass	understory_biomass	understory_diversity	ecto_spatial	ecto_range_m	ecto_r2	lat	lon
1	0	0.475238	21.32	2.012	0.129326	3.32721	0.3306	54.5596	-118.663
2	0	0.361143	65.98	2.446	0.24	9.20741	0.3903	54.6458	-118.985
3	13	0.824286	48.8	1.955	0.16129	6.00655	0.1968	54.6455	-118.977
4	28	0.471143	53.64	1.92	0.160075	3.90586	0.1398	54.6687	-118.987
5	47	0.265	128.62	2.364	0.317544	11.1323	0.2352	54.6375	-118.991
6	20	0.35975	253.7	2.346	0.254237	12.4	0.3769	54.74	-118.97
7	45	0.2905	188.52	2.26	0.329099	11.7311	0.3878	54.6696	-118.988
8	59	0.5915	114.94	2.033	0.2	5.99765	0.149	54.6701	-118.992
9	63	0.239857	66.25	2.369	0.197952	6.06817	0.2313	54.6576	-118.997
10	64	0.485375	96.66	2.239	0.229672	6.22817	0.4218	54.7401	-118.969
11	82	0.615143	82.86	2.175	0.141892	3.74311	0.2376	54.7369	-118.954
