# Supplementary material for: Large-scale insect outbreak homogenizes the spatial structure of ectomycorrhizal fungal communities
Source: PeerJ. 2019 May 10;7:e6895. doi: 10.7717/peerj.6895 (PMC6512761; doi:10.7717/peerj.6895)
Supplement: Table S2 — A CLAM analysis was performed to classify EM fungal OTUs into the following categories: EM fungi primarily found in undisturbed forest stands (Undisturbed), EM fungi primarily found in beetle-killed forest stands (Beetle-killed), and fungi common in both undisturbed and beetle-killed forest stands (Shared). [file peerj-07-6895-s003.docx]

Table S2. A list of ectomycorrhizal (EM) fungal OTUs present in soil cores from undisturbed and severely beetled-killed (>60% Pinus contorta killed basal area) stands of west-central Alberta, Canada. A CLAM analysis was performed to classify EM fungal OTUs into the following categories: EM fungi primarily found in undisturbed forest stands (Undisturbed), EM fungi primarily found in beetle-killed forest stands (Beetle-killed), and fungi common in both undisturbed and beetle-killed forest stands (Shared).

| **Taxonomic**  **affiliation** | **Phylum** | **Order** | **Classification**  **category** |
| --- | --- | --- | --- |
| | *Amphinema* | | --- | | *Russula* | | *Cortinarius* | | *Russula__1* | | *Piloderma* | | *Cortinarius__1* | | *Cortinarius__2* | | *Russulaceae* | | *Cortinarius__3* | | *Cortinarius__4* | | *Cortinarius__5* | | *Suillus* | | *Russula__2* | | *Russula__3* | | *Cortinarius__6* | | *Hymenogaster* | | *Cortinarius__7* | | *Cortinarius__8* | | *Pseudotomentella* | | *Tomentella* | | *Cortinarius__9* | | *Russula__4* | | *Cortinarius__10* | | *Russula__5* | | *Cortinarius__11* | | *Tomentella__1* | | *Hygrophorus* | | *Russulaceae__1* | | *Russulaceae__2* | | *Russula__6* | | *Russula__7* | | *Russula__8* | | *Russula__9* | | *Cortinarius__12* | | *Russula__10* | | *Amphinema__1* | | *Tylospora* | | *Inocybaceae* | | *Russula__11* | | *Russula__12* | | *Gymnomyces* | | *Rhizopogon* | | *Pseudotomentella__1* | | *Piloderma__1* | | *Cortinarius__13* | | *Cortinarius__14* | | *Cortinarius__15* | | *Russula__13* | | *Piloderma__2* | | *Cortinarius__16* | | *Cortinarius__17* | | *Cortinarius__18* | | *Russula__14* | | *Tomentella__2* | | *Wilcoxina* | | *Inocybaceae__1* | | *Russula__15* | | *Hygrophorus__1* | | *Wilcoxina__1* | | *Tylospora__1* | | *Russula__16* | | *Cortinarius__19* | | *Cortinarius__20* | | *Tomentella__3* | | *Amphinema__2* | | *Cortinarius__21* | | *Tylospora__2* | | *Piloderma__3* | | *Sebacinaceae* | | *Inocybaceae__2* | | *Cortinarius__22* | | *Piloderma__4* | | *Tomentella__4* | | *Tomentella__5* | | *Suillus__1* | | *Russula__17* | | *Cortinarius__23* | | *Piloderma__5* | | *Piloderma__6* | | *Russula__18* | | *Cortinarius__24* | | *Piloderma__7* | | *Suillus__2* | | *Piloderma__8* | | *Tuber* | | *Piloderma__9* | | *Tomentella__6* | | *Russula__19* | | *Russulaceae__3* | | *Russula__20* | | *Tomentella__7* | | *Tylospora__3* | | *Russula__21* | | *Russula__22* | | *Cortinarius__25* | | *Cortinarius__26* | | *Tomentella__8* | | *Lactarius* | | *Russula__23* | | *Elaphomyces* | | *Piloderma__10* | | *Piloderma__11* | | *Piloderma__12* | | *Russula__24* | | *Piloderma__13* | | *Piloderma__14* | | *Russula__25* | | *Russula__26* | | *Russulaceae__4* | | *Cortinarius__27* | | *Cortinarius__28* | | *Lactarius__1* | | *Tylospora__4* | | *Sphaerosporella* | | *Piloderma__15* | | *Wilcoxina__2* | | *Tomentella__9* | | *Tomentella__10* | | *Tomentella__11* | | *Hygrophorus__2* | | *Tylospora__5* | | | Basidiomycota | | --- | | Basidiomycota | | Basidiomycota | | Basidiomycota | | Basidiomycota | | Basidiomycota | | Basidiomycota | | Basidiomycota | | Basidiomycota | | Basidiomycota | | Basidiomycota | | Basidiomycota | | Basidiomycota | | Basidiomycota | | Basidiomycota | | Basidiomycota | | Basidiomycota | | Basidiomycota | | Basidiomycota | | Basidiomycota | | Basidiomycota | | Basidiomycota | | Basidiomycota | | Basidiomycota | | Basidiomycota | | Basidiomycota | | Basidiomycota | | Basidiomycota | | Basidiomycota | | Basidiomycota | | Basidiomycota | | Basidiomycota | | Basidiomycota | | Basidiomycota | | Basidiomycota | | Basidiomycota | | Basidiomycota | | Basidiomycota | | Basidiomycota | | Basidiomycota | | Basidiomycota | | Basidiomycota | | Basidiomycota | | Basidiomycota | | Basidiomycota | | Basidiomycota | | Basidiomycota | | Basidiomycota | | Basidiomycota | | Basidiomycota | | Basidiomycota | | Basidiomycota | | Basidiomycota | | Basidiomycota | | Ascomycota | | Basidiomycota | | Basidiomycota | | Basidiomycota | | Ascomycota | | Basidiomycota | | Basidiomycota | | Basidiomycota | | Basidiomycota | | Basidiomycota | | Basidiomycota | | Basidiomycota | | Basidiomycota | | Basidiomycota | | Basidiomycota | | Basidiomycota | | Basidiomycota | | Basidiomycota | | Basidiomycota | | Basidiomycota | | Basidiomycota | | Basidiomycota | | Basidiomycota | | Basidiomycota | | Basidiomycota | | Basidiomycota | | Basidiomycota | | Basidiomycota | | Basidiomycota | | Basidiomycota | | Ascomycota | | Basidiomycota | | Basidiomycota | | Basidiomycota | | Basidiomycota | | Basidiomycota | | Basidiomycota | | Basidiomycota | | Basidiomycota | | Basidiomycota | | Basidiomycota | | Basidiomycota | | Basidiomycota | | Basidiomycota | | Basidiomycota | | Ascomycota | | Basidiomycota | | Basidiomycota | | Basidiomycota | | Basidiomycota | | Basidiomycota | | Basidiomycota | | Basidiomycota | | Basidiomycota | | Basidiomycota | | Basidiomycota | | Basidiomycota | | Basidiomycota | | Basidiomycota | | Ascomycota | | Basidiomycota | | Ascomycota | | Basidiomycota | | Basidiomycota | | Basidiomycota | | Basidiomycota | | Basidiomycota | | | Atheliales | | --- | | Russulales | | Agaricales | | Russulales | | Atheliales | | Agaricales | | Agaricales | | Russulales | | Agaricales | | Agaricales | | Agaricales | | Boletales | | Russulales | | Russulales | | Agaricales | | Agaricales | | Agaricales | | Agaricales | | Thelephorales | | Thelephorales | | Agaricales | | Russulales | | Agaricales | | Russulales | | Agaricales | | Thelephorales | | Agaricales | | Russulales | | Russulales | | Russulales | | Russulales | | Russulales | | Russulales | | Agaricales | | Russulales | | Atheliales | | Atheliales | | Agaricales | | Russulales | | Russulales | | Russulales | | Boletales | | Thelephorales | | Atheliales | | Agaricales | | Agaricales | | Agaricales | | Russulales | | Atheliales | | Agaricales | | Agaricales | | Agaricales | | Russulales | | Thelephorales | | Pezizales | | Agaricales | | Russulales | | Agaricales | | Pezizales | | Atheliales | | Russulales | | Agaricales | | Agaricales | | Thelephorales | | Atheliales | | Agaricales | | Atheliales | | Atheliales | | Sebacinales | | Agaricales | | Agaricales | | Atheliales | | Thelephorales | | Thelephorales | | Boletales | | Russulales | | Agaricales | | Atheliales | | Atheliales | | Russulales | | Agaricales | | Atheliales | | Boletales | | Atheliales | | Pezizales | | Atheliales | | Thelephorales | | Russulales | | Russulales | | Russulales | | Thelephorales | | Atheliales | | Russulales | | Russulales | | Agaricales | | Agaricales | | Thelephorales | | Russulales | | Russulales | | Eurotiales | | Atheliales | | Atheliales | | Atheliales | | Russulales | | Atheliales | | Atheliales | | Russulales | | Russulales | | Russulales | | Agaricales | | Agaricales | | Russulales | | Atheliales | | Pezizales | | Atheliales | | Pezizales | | Thelephorales | | Thelephorales | | Thelephorales | | Agaricales | | Atheliales | | | Shared | | --- | | Shared | | Shared | | Shared | | Shared | | Undisturbed | | Shared | | Shared | | Undisturbed | | Shared | | Shared | | Undisturbed | | Shared | | Shared | | Shared | | Shared | | Shared | | Shared | | Shared | | Undisturbed | | Shared | | Undisturbed | | Shared | | Shared | | Shared | | Undisturbed | | Beetle-killed | | Shared | | Undisturbed | | Shared | | Shared | | Undisturbed | | Undisturbed | | Shared | | Shared | | Shared | | Shared | | Shared | | Shared | | Shared | | Undisturbed | | Undisturbed | | Shared | | Shared | | Shared | | Shared | | Shared | | Shared | | Shared | | Shared | | Undisturbed | | Shared | | Shared | | Shared | | Shared | | Shared | | Undisturbed | | Shared | | Shared | | Beetle-killed | | Shared | | Shared | | Shared | | Shared | | Undisturbed | | Undisturbed | | Shared | | Shared | | Shared | | Undisturbed | | Shared | | Shared | | Shared | | Beetle-killed | | Shared | | Shared | | Shared | | Beetle-killed | | Shared | | Shared | | Shared | | Shared | | Shared | | Shared | | Shared | | Shared | | Beetle-killed | | Shared | | Beetle-killed | | Undisturbed | | Undisturbed | | Beetle-killed | | Shared | | Shared | | Undisturbed | | Shared | | Shared | | Shared | | Undisturbed | | Shared | | Shared | | Beetle-killed | | Shared | | Beetle-killed | | Shared | | Shared | | Beetle-killed | | Shared | | Beetle-killed | | Shared | | Beetle-killed | | Shared | | Shared | | Shared | | Shared | | Shared | | Shared | | Shared | | Shared | | Beetle-killed | | Shared | |
|  |  |  |  |
|  |  |  |  |
